# Supplementary material for: Hydrogen bonding-promoted efficient Ru-catalyzed ring-closing metathesis of demanding homoallyl 2-(hydroxymethyl)acrylates
Source: Royal Society of Chemistry journal article supplement (doi:10.1039/c6ob02129h), 2016-01-01

**Hydrogen bonding-promoted efficient Ru-catalyzed ring-closing metathesis of steric demanding homoallyl 2-(hydroxymethyl)acrylates**

Liang Feng <sup>a,†</sup>, Yuehui Liu <sup>a,†</sup>, Bo Hou <sup>b,†</sup>, Zaifeng Yuan <sup>a</sup>, Fu-Chao Yu <sup>a</sup>, Tingbin Yan <sup>a</sup>, Qi Qin <sup>a</sup>,  
Ruigeng Ji <sup>a</sup>, Ya-Min Li <sup>a</sup>, Yuehai Shen <sup>a,\*</sup>, Zhi-Li Zuo <sup>b,\*</sup>

(L. Feng, Y. H. Liu, B. Hou, Z. F. Yuan, F. C. Yu, T. B. Yan, R. G. Ji, Y. M. Li, Y. H. Shen, Z. L. Zuo)

a. Faculty of Life Science and Technology, Kunming University of Science and Technology, Kunming 650500, Yunnan, China

b. State Key Laboratory of Phytochemistry and Plant Resources in West China, Kunming Institute of Botany, Chinese Academy of Sciences, Kunming 650201, Yunnan, China

<sup>†</sup>: These authors contributed equally to this work and share first authorship.

\*Corresponding authors: Y. H. Shen, Tel.: +86 871 65920747, e-mail: yuehaishen@gmail.com; Z. L. Zuo, e-mail: zuozhili@mail.kib.ac.cn.

**Supporting Information**

| <b>Table of Contents</b>                   | <b>Page</b> |
|--------------------------------------------|-------------|
| Synthesis of RCM substrates                | S2          |
| References                                 | S9          |
| NMR spectra of RCM substrates and products | S10         |

## ■ Synthesis of RCM substrates

### 1. General procedures for substrate synthesis

The substrates for the ring-closing metathesis reactions were prepared by using the following two routes. No attempts were made to optimize yields for substrate synthesis.

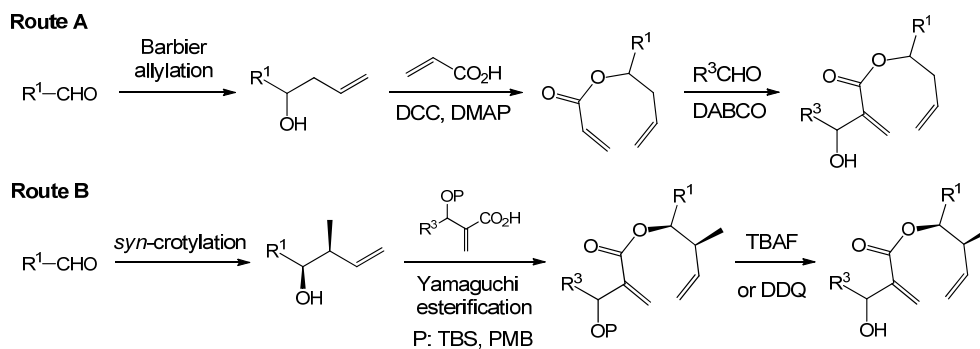

#### 1.1. General procedures of Route A

##### 1) Barbier reaction step

To a round-bottom flask containing a magnetic stir bar were added THF (50 mL), aldehyde (20 mmol) and zinc dust (10 mmol). The reaction vessel was cooled to 0 °C in an ice bath. Allyl bromide (24 mmol) was added into the round-bottom flask, followed by saturated aqueous  $NH_4Cl$  solution (1.0 mL). The reaction was allowed to warm to room temperature and stirred for 6 h. The reaction was quenched with  $NH_4Cl$  solution (30 mL), filtered, and extracted with EtOAc. The organic phases were combined, washed with water and brine, dried over anhydrous  $Na_2SO_4$ , filtered, and concentrated under reduced pressure. The crude product obtained was purified by silica gel column chromatography (petroleum ether/ethyl acetate) to give the homoallylic alcohol in 75-90% yield.

##### 2) Esterification step

To a round-bottom flask containing a magnetic stir bar were added anhydrous DCM (100 mL), acrylic acid (20 mmol), DCC (30 mmol) and DMAP (4 mmol). The reaction was allowed to stir at 0 °C for 30 min. The homoallylic alcohol obtained above (10 mmol) was dissolved in DCM (3 mL) and added into the round-bottom flask. The reaction was allowed to stir at room temperature for 24 h, then the second portion of DCC (20 mmol) was added and the mixture stirred for another 24 h. The mixture was filtered through a pad of celite. The filtrate was washed with water and brine, dried over  $Na_2SO_4$ ,

filtered, and concentrated under reduced pressure. The crude product was purified by silica gel column chromatography (petroleum ether/ethyl acetate) to give the homoallyl acrylate in 22-46% yield.

### 3) Baylis-Hillman reaction step

To a round-bottom flask containing a magnetic stir bar were added 1,4-dioxane (20 mL), homoallyl acrylate obtained above (2 mmol), aldehyde (5 mmol) and DABCO (2 mmol). The reaction was allowed to stir at room temperature for 2 days. The mixture was partitioned between EtOAc and water. The organic phases were separated, washed with water and brine, dried over Na<sub>2</sub>SO<sub>4</sub>, filtered, and concentrated under vacuum. The crude product was purified by silica gel column chromatography (petroleum ether/ethyl acetate) to give the homoallyl 2-(hydroxymethyl)acrylate in 68-86% yield.

## 1.2. General procedures of Route B

### 1) *syn*-Crotylation step

Roush's protocol for *syn*-crotylation was used.<sup>1-3</sup> To a suspension of powdered 4 Å molecular sieves (5.8 g) in anhydrous toluene (40 mL) under nitrogen was added the matched Roush's (*Z*)-crotylboronate (1.0 M in toluene, 16.5 mL, 16.5 mmol) freshly prepared from (*S,S*)- or (*R,R*)-diisopropyl tartrate. The mixture was stirred at r.t. for 30 min, and then cooled to -80 °C. A solution of aldehyde (9.7 mmol) in toluene (20 mL) was added dropwise over 20 min, and then the reaction was stirred at -80 °C for 18 h. An aqueous solution of NaOH (1 N, 100 mL) was added. The resulted mixture was stirred at r.t. for 1 h, filtered through celite, and separated. The aqueous phase was extracted with Et<sub>2</sub>O (20 mL x 3). The combined organic phases were washed with brine, dried over MgSO<sub>4</sub>, filtered, and concentrated. The crude product was purified by silica gel column chromatography (petroleum ether/ethyl acetate) to afford the corresponding homoallylic alcohol. The yield and stereoselectivity for each substrate are: benzaldehyde, 86% yield, d.r. > 20:1, e.r. 1.7:1; (*S*)-glyceraldehyde acetonide, 74% yield, d.r. > 20:1; (*2S*)-5-(TBSO)-2-methoxypentanal, 93% yield, d.r. 5.5:1.<sup>3</sup>

### 2) Yamaguchi esterification step

The TBS-protected carboxylic acid (1.5 equiv. to the homoallylic alcohol) was dissolved in anhydrous DCM (0.1 M) under nitrogen. Triethylamine (6 equiv.) and 2,4,6-trichlorobenzoyl chloride (2.25 equiv.) were added at r.t. with stirring. After 1.5 hours, solutions of the homoallylic alcohol in

DCM and DMAP (0.5 equiv.) in DCM were added. The reaction was stirred at r.t. for 5 hours, and then was quenched by adding saturated aqueous solution of Na<sub>2</sub>CO<sub>3</sub>. The organic layer was separated, and the aqueous layer was extracted with DCM. The combined organic layers were washed with water and brine, dried over anhydrous MgSO<sub>4</sub>, filtered, and concentrated under reduced pressure. The crude product was purified by silica gel column chromatography (petroleum ether/ethyl acetate) to afford the ester as a mixture of stereoisomers in 76-85% yield.

### 3) Deprotection step

**Removal of TBS group:** The above-obtained TBS-protected ester was dissolved in THF and treated with tetrabutylammonium fluoride (1.00 M in THF, 1.5 equiv.) overnight. The reaction mixture was concentrated under reduced pressure. The crude product was purified by silica gel column chromatography (petroleum ether/ethyl acetate) to afford the desired alcohol in 81-87% yield.

**Removal of PMB group:** The above-obtained PMB-protected ester was dissolved in a DCM-water mixture (DCM/water 1:0.05) and treated with DDQ (1.2 equiv.) for 2 h. The mixture was washed with saturated aqueous NaHCO<sub>3</sub> solution. The aqueous phase was extracted with DCM. The combined organic phases were washed with brine, dried over MgSO<sub>4</sub>, filtered, and concentrated under reduced pressure. The crude product was purified by silica gel column chromatography (petroleum ether/ethyl acetate) to afford the desired alcohol in 85-90% yield.

## 2. Characterization of substrates

### 2.1. 1-Phenylbut-3-en-1-yl 2-(hydroxymethyl)acrylate (**1a**)

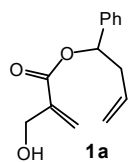

Colorless oil. Yield: 18% (3 steps from benzaldehyde, Route A).

<sup>1</sup>H-NMR (400 MHz, CDCl<sub>3</sub>) δ 7.30-7.20 (m, 5H), 6.25 (bs, 1H), 5.82 (dd, *J* = 8.0, 5.5 Hz, 1H), 5.77 (dd, *J* = 2.5, 1.5 Hz, 1H), 5.71-5.60 (m, 1H), 5.06-4.98 (m, 2H), 4.25 (bs, 2H), 2.68-2.50 (m, 2H), 2.16 (bs, 1H). <sup>13</sup>C-NMR (100 MHz, CDCl<sub>3</sub>) δ 165.9, 141.3, 139.6, 133.3, 128.5, 128.3, 126.0, 125.7, 118.2, 73.5, 62.7, 38.6. HRMS (ESI) [M+Ma]<sup>+</sup> calcd for C<sub>14</sub>H<sub>16</sub>NaO<sub>3</sub> 255.0992, found 255.0993. IR (KBr) (cm<sup>-1</sup>) 3440, 2958, 2927, 1709, 1635, 1450, 1385, 1266, 1169, 1047, 814.

### 2.2. 1-(4-Bromophenyl)but-3-en-1-yl 2-(hydroxymethyl)acrylate (**1c**)

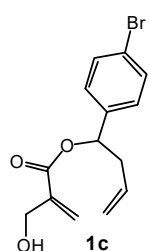

Colorless oil. Yield: 30% (3 steps from *p*-bromobenzaldehyde, Route A).

$^1\text{H-NMR}$  (400 MHz,  $\text{CDCl}_3$ )  $\delta$  7.48 (d,  $J = 8.5$  Hz, 2H), 7.21 (d,  $J = 8.5$  Hz, 2H), 6.31 (s, 1H), 5.87 (bs, 1H), 5.85-5.80 (m, 1H), 5.75-5.63 (m, 1H), 5.13-5.06 (m, 2H), 4.32 (s, 2H), 2.73-2.54 (m, 2H), 2.23 (bs, 1H).  $^{13}\text{C-NMR}$  (100 MHz,  $\text{CDCl}_3$ )  $\delta$  164.3, 138.3, 137.8, 131.6, 130.7, 127.1, 125.2, 121.0, 117.7, 74.1, 61.4, 39.6. HRMS (ESI)  $[\text{M}+\text{Ma}]^+$  calcd for  $\text{C}_{14}\text{H}_{15}\text{BrNaO}_3$  333.0102, found 333.0095. IR (KBr) ( $\text{cm}^{-1}$ ) 3432, 2928, 1714, 1642, 1490, 1265, 1160, 1053, 820.

### 2.3. 1-(4-Methoxyphenyl)but-3-en-1-yl 2-(hydroxymethyl)acrylate (1d)

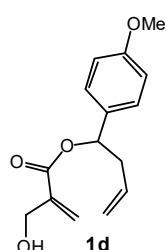

Colorless oil. Yield: 29% (3 steps from *p*-methoxybenzaldehyde, Route A).

$^1\text{H-NMR}$  (400 MHz,  $\text{CDCl}_3$ )  $\delta$  7.20 (d,  $J = 8.5$  Hz, 2H), 6.80 (d,  $J = 8.5$  Hz, 2H), 6.21 (s, 1H), 5.79-5.74 (m, 2H), 5.69-5.57 (m, 1H), 5.05-4.96 (m, 2H), 4.23 (s, 2H), 3.71 (s, 3H), 2.68-2.47 (m, 2H), 2.40 (bs, 1H).  $^{13}\text{C-NMR}$  (100 MHz,  $\text{CDCl}_3$ )  $\delta$  165.5, 159.4, 139.6, 133.3, 131.9, 127.9, 125.8, 118.2, 113.9, 75.5, 62.4, 55.3, 40.7. HRMS (ESI)  $[\text{M}+\text{Ma}]^+$  calcd for  $\text{C}_{15}\text{H}_{18}\text{NaO}_4$  285.1097, found 285.1089. IR (KBr) ( $\text{cm}^{-1}$ ) 3466, 2937, 1715, 1614, 1515, 1252, 1170, 1051, 830.

### 2.4. 1-Phenylhex-5-en-3-yl 2-(hydroxymethyl)acrylate (1e)

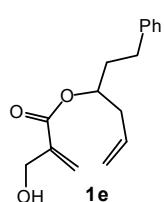

Colorless oil. Yield: 25% (3 steps from hydrocinnamic aldehyde, Route A).

$^1\text{H-NMR}$  (400 MHz,  $\text{CDCl}_3$ )  $\delta$  7.31-7.25 (m, 2H), 7.11-7.14 (m, 3H), 6.25 (bs, 1H), 5.83-5.81 (m, 1H), 5.81-5.71 (m, 1H), 5.13-5.04 (m, 3H), 4.32 (bs, 2H), 2.73-2.58 (m, 2H), 2.47-2.35 (m, 2H), 2.32 (bs, 1H), 2.02-1.89 (m, 2H).  $^{13}\text{C-NMR}$  (100 MHz,  $\text{CDCl}_3$ )  $\delta$  165.9, 141.3, 139.6, 133.3, 128.5, 128.3, 126.0, 125.7, 118.2, 73.6, 62.7, 38.6, 35.2, 31.7. HRMS (ESI)  $[\text{M}+\text{Ma}]^+$  calcd for  $\text{C}_{16}\text{H}_{20}\text{NaO}_3$  283.1305, found 283.1306. IR (KBr) ( $\text{cm}^{-1}$ ) 3427, 2961, 2926, 1713, 1640, 1384, 1262, 1093, 1026, 805.

### 2.5. 1-Phenylhex-5-en-3-yl 2-((4-bromophenyl)(hydroxyl)methyl)acrylate (1f)

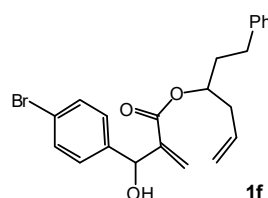

Colorless oil. Yield: 20% (3 steps from hydrocinnamic aldehyde, Route A).

Mixture of stereoisomers.

<sup>1</sup>H-NMR (400 MHz, CDCl<sub>3</sub>) δ 7.42-7.38 (m, 2H), 7.22-7.15 (m, 4H), 7.13-7.07 (m, 1H), 7.02-6.96 (m, 2H), 6.26 (bs, 1H), 5.75 (bd, *J* = 4.0 Hz, 1H), 5.64-5.48 (m, 1H), 5.40 (bd, *J* = 12.0 Hz, 1H), 5.00-4.88 (m, 3H), 3.04 (bs, 1H), 2.49-2.36 (m, 2H), 2.29-2.18 (m, 2H), 1.82-1.73 (m, 2H). <sup>13</sup>C-NMR (100 MHz, CDCl<sub>3</sub>) δ (164.72, 164.64), (140.77, 140.67), (140.11, 140.08), (139.52, 139.41), (132.03, 131.97), (130.53, 130.49), 127.44, (127.37, 127.23), 127.24, (125.24, 125.14), 124.98, (120.80, 120.71), 117.17, (72.76, 72.70), (71.96, 71.84), (37.51, 37.46), (34.11, 34.08), (30.55, 30.50). HRMS (ESI) [M+Ma]<sup>+</sup> calcd for C<sub>22</sub>H<sub>23</sub>BrKO<sub>3</sub> 453.0462, found 453.0456. IR (KBr) (cm<sup>-1</sup>) 3427, 2956, 2925, 1711, 1631, 1486, 1401, 1263, 1155, 1034, 818.

## 2.6. *syn*-2-Methyl-1-phenylbut-3-en-1-yl 3-hydroxy-2-methylene-5-phenylpentanoate (**1b**)

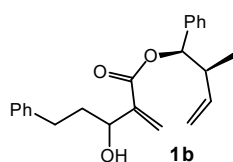

Colorless oil. Yield: 61% (3 steps from benzaldehyde, Route B with TBS protection). Mixture of stereoisomers.

[α]<sub>D</sub><sup>25</sup> = +18.3 (c 0.84, CHCl<sub>3</sub>). <sup>1</sup>H-NMR (400 MHz, CDCl<sub>3</sub>) δ 7.28-7.15 (m, 7H), 7.14-7.08 (m, 3H), 6.27 (s, 1H), 5.78-5.75 (m, 1H), 5.65 (t, *J* = 6.5 Hz, 1H), 5.62-5.53 (m, 1H), 4.9-4.88 (m, 2H), 4.35 (bs, 1H), 2.78-2.49 (m, 4H), 1.93-1.82 (m, 2H), 0.99 (d, *J* = 7.0 Hz, 1.5H), 0.98 (d, *J* = 7.0 Hz, 1.5H). <sup>13</sup>C-NMR (100 MHz, CDCl<sub>3</sub>) δ (165.64, 165.62), 142.68, (141.70, 141.68), 138.96, (138.58, 138.54), (128.54, 128.52), (128.44, 128.43), 128.24, 127.94, 126.95, 125.92, (125.28, 125.17), 115.95, (79.56, 79.52), 70.96, 42.97, 37.80, (32.15, 32.11), (15.31, 15.29). HRMS (ESI) [M+Ma]<sup>+</sup> calcd for C<sub>23</sub>H<sub>26</sub>NaO<sub>3</sub> 373.1780, found 373.1784. IR (KBr) (cm<sup>-1</sup>) 3431, 2928, 2857, 1709, 1636, 1449, 1385, 1169, 1053, 812.

## 2.7. (1*R*,2*S*)-1-((*S*)-2,2-Dimethyl-1,3-dioxolan-4-yl)-2-methylbut-3-en-1-yl 3-hydroxy-2-methylene-5-phenylpentanoate (**1g**)

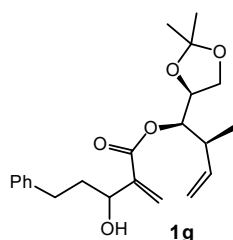

Colorless oil. Yield: 60% (3 steps from (*S*)-glyceraldehyde acetonide, Route B with TBS protection). Mixture of stereoisomers.

[α]<sub>D</sub><sup>25</sup> = -13.6 (c 3.60, CHCl<sub>3</sub>). <sup>1</sup>H-NMR (500 MHz, CDCl<sub>3</sub>) δ 7.32-7.26 (m, 2H), 7.23-7.17 (m, 3H), 6.29 (bs, 0.6H), 6.27 (bs, 0.4H), 5.84 (s, 0.6H), 5.82 (s, 0.4H), 5.79-5.71 (m, 1H), 5.21-5.17 (m, 1H), 5.10-5.05 (m, 2H), 4.47-4.40 (m, 1H), 4.29-4.24 (m, 1H), 4.02-3.96 (m, 1H), 3.90-3.84 (m, 1H), 2.87-2.78 (m, 1H), 2.77-2.67 (m, 2H), 2.53-2.43 (m, 1H), 2.04-1.94 (m, 2H), 1.36 (s, 1.2H), 1.35 (s, 1.8H), 1.34 (s, 1.2H), 1.33 (s, 1.8H), 1.08 (d, *J* = 5.8 Hz,

1.8H), 1.07 (d,  $J = 5.8$  Hz, 1.2H).  $^{13}\text{C}$ -NMR (125 MHz,  $\text{CDCl}_3$ )  $\delta$  (165.76, 165.75), (142.50, 142.33), (141.63, 141.60), (139.12, 139.11), (128.49, 128.46), (128.4, 125.90), (125.45, 125.25), (115.94, 115.93), (109.26, 109.25), 75.70, (75.02, 74.95), 71.19, 70.56, (65.21, 65.09), (39.61, 39.59), (37.74, 37.55), (32.14, 32.09), (26.44, 26.41), (25.12, 25.07), (15.45, 15.34). HR-MS (ESI)  $[\text{M}+\text{Ma}]^+$  calcd for  $\text{C}_{22}\text{H}_{30}\text{NaO}_5$  397.1991, found 397.1997. IR (KBr) ( $\text{cm}^{-1}$ ) 3431, 2929, 1718, 1622, 1427, 1266, 1167, 1079, 821.

**2.8. (1S,2R)-1-((R)-2,2-Dimethyl-1,3-dioxolan-4-yl)-2-methylbut-3-en-1-yl 3-hydroxy-2-methylene-5-phenylpentanoate (ent-1g)**

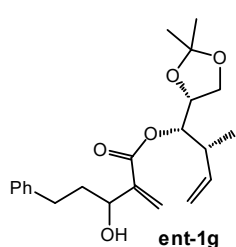

Colorless oil. Yield: 58% (3 steps from (R)-glyceraldehyde acetonide, Route B with TBS protection). Mixture of stereoisomers.

$[\alpha]_{\text{D}}^{25} = +21.5$  ( $c$  1.25,  $\text{CHCl}_3$ ).  $^1\text{H}$ -NMR (400 MHz,  $\text{CDCl}_3$ )  $\delta$  7.27-7.21 (m, 2H), 7.18-7.12 (m, 3H), 6.24-6.20 (m, 1H), 5.80-5.77 (m, 1H), 5.74-5.65 (m, 1H), 5.16-5.12 (m, 1H), 5.05-5.00 (m, 2H), 4.43-4.34 (m, 1H), 4.24-4.18 (m, 1H), 3.97-3.90 (m, 1H), 3.85-3.78 (m, 1H), 2.82-2.61 (m, 3H), 2.48-2.37 (m, 1H), 1.98-1.89 (m, 2H), 1.31 (s, 1.5H), 1.30 (s, 1.5H), 1.29 (s, 1.5H), 1.28 (s, 1.5H), 1.02 (d,  $J = 7.0$  Hz, 1.5H), 1.20 (d,  $J = 7.0$  Hz, 1.5H).  $^{13}\text{C}$ -NMR (100 MHz,  $\text{CDCl}_3$ )  $\delta$  (164.75, 164.73), (141.55, 141.38), (140.63, 140.60), 138.12, (127.48, 127.45), 127.39, 124.88, (124.39, 124.20), 114.91, 108.24, 74.69, (74.01, 73.93), (70.12, 69.51), (64.22, 64.10), (38.58, 38.57), (36.75, 36.56), (31.11, 31.06), (25.43, 25.39). (24.12, 24.06), (14.41, 14.29). HRMS (ESI)  $[\text{M}+\text{H}]^+$  calcd for  $\text{C}_{22}\text{H}_{31}\text{O}_5$  375.2166, found 375.2161. IR (KBr) ( $\text{cm}^{-1}$ ) 3443, 2933, 2872, 1714, 1619, 1513, 1256, 1171, 1037, 828.

**2.9. (3S,4R,5S)-8-((tert-Butyldimethylsilyloxy)-5-methoxy-3-methyloct-1-en-4-yl 2-(hydroxyl (phenyl)methyl)acrylate (1h)**

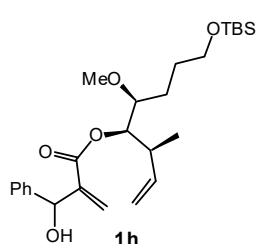

Colorless oil. Yield: 68% (3 steps from (2S)-5-(TBSO)-2-methoxypentanal, Route B with PMB protection). Mixture of stereoisomers.

$[\alpha]_{\text{D}}^{25} = +25.1$  ( $c$  2.87,  $\text{CHCl}_3$ ).  $^1\text{H}$ -NMR (400 MHz,  $\text{CDCl}_3$ )  $\delta$  7.39-7.31 (m, 4H), 7.30-7.7.25 (m, 1H), 6.37-6.30 (m, 1H), 5.82-5.70 (m, 1H), 5.55 (bs, 1H), 5.52-5.36 (m, 1H), 5.28-5.15 (m, 1H), 5.10-4.94 (m, 1H), 3.64-3.50 (m, 2H), 3.36-3.29 (m, 3H), 3.26-3.16 (m, 1.7H), 3.10-3.05 (m, 0.3H), 2.45-2.14 (m, 2H), 1.69-1.60 (m, 1H), 1.60-1.55 (m, 3H),

1.55-1.43 (m, 2H), 1.42-1.32 (m, 1H), 8.88 (bs, 9H), 0.04 (bs, 6H).  $^{13}\text{C}$ -NMR (100 MHz,  $\text{CDCl}_3$ )  $\delta$  (166.32, 166.23), 142.65, 141.67, 128.78, 128.16, 127.30, 126.99, 126.49, 125.42, 125.27, (82.03, 81.96), 81.17, (75.35, 75.20), 74.95, 73.82, 63.35, (58.55, 58.44), (33.60, 33.20), (29.22, 29.04), 27.78, (27.55, 27.47), (26.95, 26.87), 26.48, 26.35, (18.72, 18.29), 13.25, -4.90. HRMS (ESI)  $[\text{M}+\text{Ma}]^+$  calcd for  $\text{C}_{26}\text{H}_{42}\text{NaO}_5\text{Si}$  485.2699, found 485.2708. IR (KBr) ( $\text{cm}^{-1}$ ) 3425, 2960, 1712, 1621, 1510, 1385, 1250, 1163, 1036, 817.

**2.10. (3*S*,4*R*,5*S*)-8-((*tert*-Butyldimethylsilyloxy)-5-methoxy-3-methyloct-1-en-4-yl) 2-((4-bromophenyl)(hydroxy)methyl)acrylate (1i)**

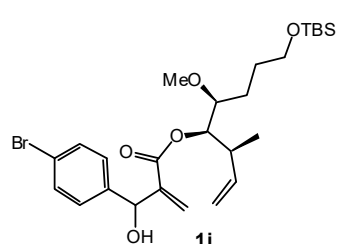

Colorless oil. Yield: 62% (3 steps from (2*S*)-5-(TBSO)-2-methoxypentanal, Route B with PMB protection). Mixture of stereoisomers.

$[\alpha]_{\text{D}}^{25} = -32.7$  (*c* 1.95,  $\text{CHCl}_3$ ).  $^1\text{H}$ -NMR (500 MHz,  $\text{CDCl}_3$ )  $\delta$  7.47 (d,  $J = 8.5$  Hz, 2H), 7.25 (d,  $J = 8.5$  Hz, 2H), 6.31 (bs, 1H), 5.68-5.59 (m, 1H), 5.65 (bs, 1H), 5.52 (d,  $J = 4.0$  Hz, 1H), 5.11 (dd,  $J = 8.5, 3.5$  Hz, 1H), 5.08-5.00 (m, 2H), 3.65-3.59 (m, 1H), 3.58-3.52 (m, 1H), 3.39 (d,  $J = 4.5$  Hz, 1H), 3.30 (s, 3H), 3.30-3.24 (m, 1H), 2.48-2.39 (m, 1H), 1.71-1.62 (m, 2H), 1.52-1.36 (m, 2H), 0.89 (bs, 9H), 0.89-0.87 (m, 3H), 0.05 (bs, 6H).  $^{13}\text{C}$ -NMR (125 MHz,  $\text{CDCl}_3$ )  $\delta$  166.4, 142.7, 140.6, 139.6, 131.9, 128.9, 126.6, 122.1, 116.2, 81.0, 76.2, 73.1, 63.3, 57.6, 39.6, 29.2, 26.4, 26.7, 18.7, 16.8, -4.9. HRMS (ESI)  $[\text{M}+\text{Ma}]^+$  calcd for  $\text{C}_{26}\text{H}_{41}\text{BrNaO}_5\text{Si}$  563.1804, found 563.1784. IR (KBr) ( $\text{cm}^{-1}$ ) 3428, 2926, 1716, 1640, 1455, 1384, 1257, 1092, 807.

**2.11. (3*S*,4*R*,5*S*)-8-((*tert*-Butyldimethylsilyloxy)-5-methoxy-3-methyloct-1-en-4-yl) 3-hydroxy-2-methylene-5-phenylpentanoate (1j)**

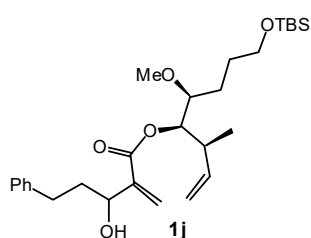

Colorless oil. Yield: 62% (3 steps from (2*S*)-5-(TBSO)-2-methoxypentanal, Route B with PMB protection). Mixture of stereoisomers.

$[\alpha]_{\text{D}}^{25} = -6.0$  (*c* 2.34,  $\text{CHCl}_3$ ).  $^1\text{H}$ -NMR (500 MHz,  $\text{CDCl}_3$ )  $\delta$  7.31-7.26 (m, 2H), 7.23-7.16 (m, 3H), 6.24 (bs, 1H), 5.82 (bs, 0.5H), 5.80 (bs, 0.5H), 5.76-5.65 (m, 1H), 5.20-5.15 (m, 1H), 5.13-5.03 (m, 2H), 4.45 (bs, 1H), 3.68-3.54 (m, 2H), 3.38-3.28 (m, 1H), 3.34 (s, 1.5H), 3.33 (s, 1.5H), 2.88-2.77 (m, 1H), 2.75-2.65 (m, 1H), 2.57-2.47 (m, 1H), 2.05-1.90 (m, 2H),



1.75-1.66 (m, 2H), 1.55-1.40 (m, 2H), 1.04 (d,  $J = 6.5$  Hz, 1.5H), 1.02 (d,  $J = 6.5$  Hz, 1.5H), 0.90 (bs, 9 H), 0.05 (bs, 6 H).  $^{13}\text{C}$ -NMR (125 MHz,  $\text{CDCl}_3$ )  $\delta$  (166.31, 166.13), (142.84, 142.73), 141.83, (139.50, 139.39), (128.55, 128.52), 128.41, (125.88, 125.86), (124.79, 124.72), (115.86, 115.81), 80.61, (75.33, 75.28), (71.07, 70.34), 63.03, (57.27, 57.25), 39.23, (37.97, 37.40), (32.16, 32.11), (28.91, 28.89), 25.99, (25.34, 25.23), 18.36, (16.60, 16.48), -5.24. HRMS (ESI)  $[\text{M}+\text{Na}]^+$  calcd for  $\text{C}_{26}\text{H}_{42}\text{NaO}_5\text{Si}$  513.3012, found 513.3003. IR (KBr) ( $\text{cm}^{-1}$ ) 3480, 2963, 2928, 1714, 1590, 1459, 1382, 1260, 1049, 804.

**2.12. (3*S*,4*R*,5*S*)-8-((*tert*-Butyldimethylsilyloxy)-5-methoxy-3-methyloct-1-en-4-yl 3-hydroxy-4-methyl-2-methylenepentanoate (1k)**

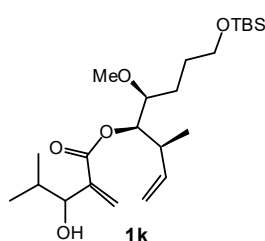

Colorless oil. Yield: 61% (3 steps from (2*S*)-5-(TBSO)-2-methoxypentanal, Route B with PMB protection). Mixture of stereoisomers.

$^1\text{H}$ -NMR (500 MHz,  $\text{CDCl}_3$ )  $\delta$  6.28 (s, 0.3H), 6.2 (s, 0.7H), 5.76-5.66 (m, 2H), 5.13 (dd,  $J = 7.5, 4.0$  Hz, 0.7H), 5.11-5.01 (m, 2H), 4.99-4.92 (m, 0.3H), 4.05 (bs, 0.7H), 3.98 (bs, 0.3H), 3.67-3.53 (m, 2H), 3.39-3.27 (m, 1H), 3.36 (s, 0.9H), 3.32 (s, 2.1H), 2.80 (bs, 0.3H), 2.75-2.68 (m, 0.3H), 2.65 (bs, 0.7H), 2.58-2.50 (m, 0.7H), 1.97-1.87 (m, 1H), 1.72-1.38 (m, 4H), 1.03 (d,  $J = 6.5$  Hz, 2.1H), 1.01-0.92 (m, 3.9H), 0.90-0.83 (m, 12H), 0.04 (s, 4.2H), 0.03 (s, 1.8H).  $^{13}\text{C}$ -NMR (125 MHz,  $\text{CDCl}_3$ )  $\delta$  166.74, 142.09, (140.43, 140.11), (126.68, 125.94), (116.14, 115.93), (80.97, 80.37), (79.11, 78.22), 75.85, (63.45, 63.29), (58.31, 57.59), (39.45, 39.38), (33.29, 33.07), (29.22, 28.83), 26.76, 26.34, 25.95, 20.04, (18.71, 18.48), (17.99, 17.84), 16.44, -4.90. HRMS (ESI)  $[\text{M}+\text{Ma}]^+$  calcd for  $\text{C}_{23}\text{H}_{44}\text{NaO}_5\text{Si}$  451.2856, found 451.2859. IR (KBr) ( $\text{cm}^{-1}$ ) 3447, 2926, 1712, 1623, 1485, 1402, 1257, 1161, 1012, 814.

■ **References**

1. W. R. Roush, K. Ando, D. B. Powers, A. D. Palkowitz, R. L. Halterman, *J. Am. Chem. Soc.*, 1990, **112**, 6339.
2. W. R. Roush, L. K. Hoong, M. A. J. Palmer, J. A. Straub, A. D. Palkowitz, *J. Org. Chem.*, 1990, **55**, 4117.
3. X. G. Liu, Z. L. Yang, Y. M. Li, F. Yang, L. Feng, N. Z. Wang, D. B. Ma, K. J. Chang, Y. H. Shen, *Tetrahedron*, 2014, **70**, 9522.

■ NMR spectra of RCM substrates and products

45-1  
PROTON

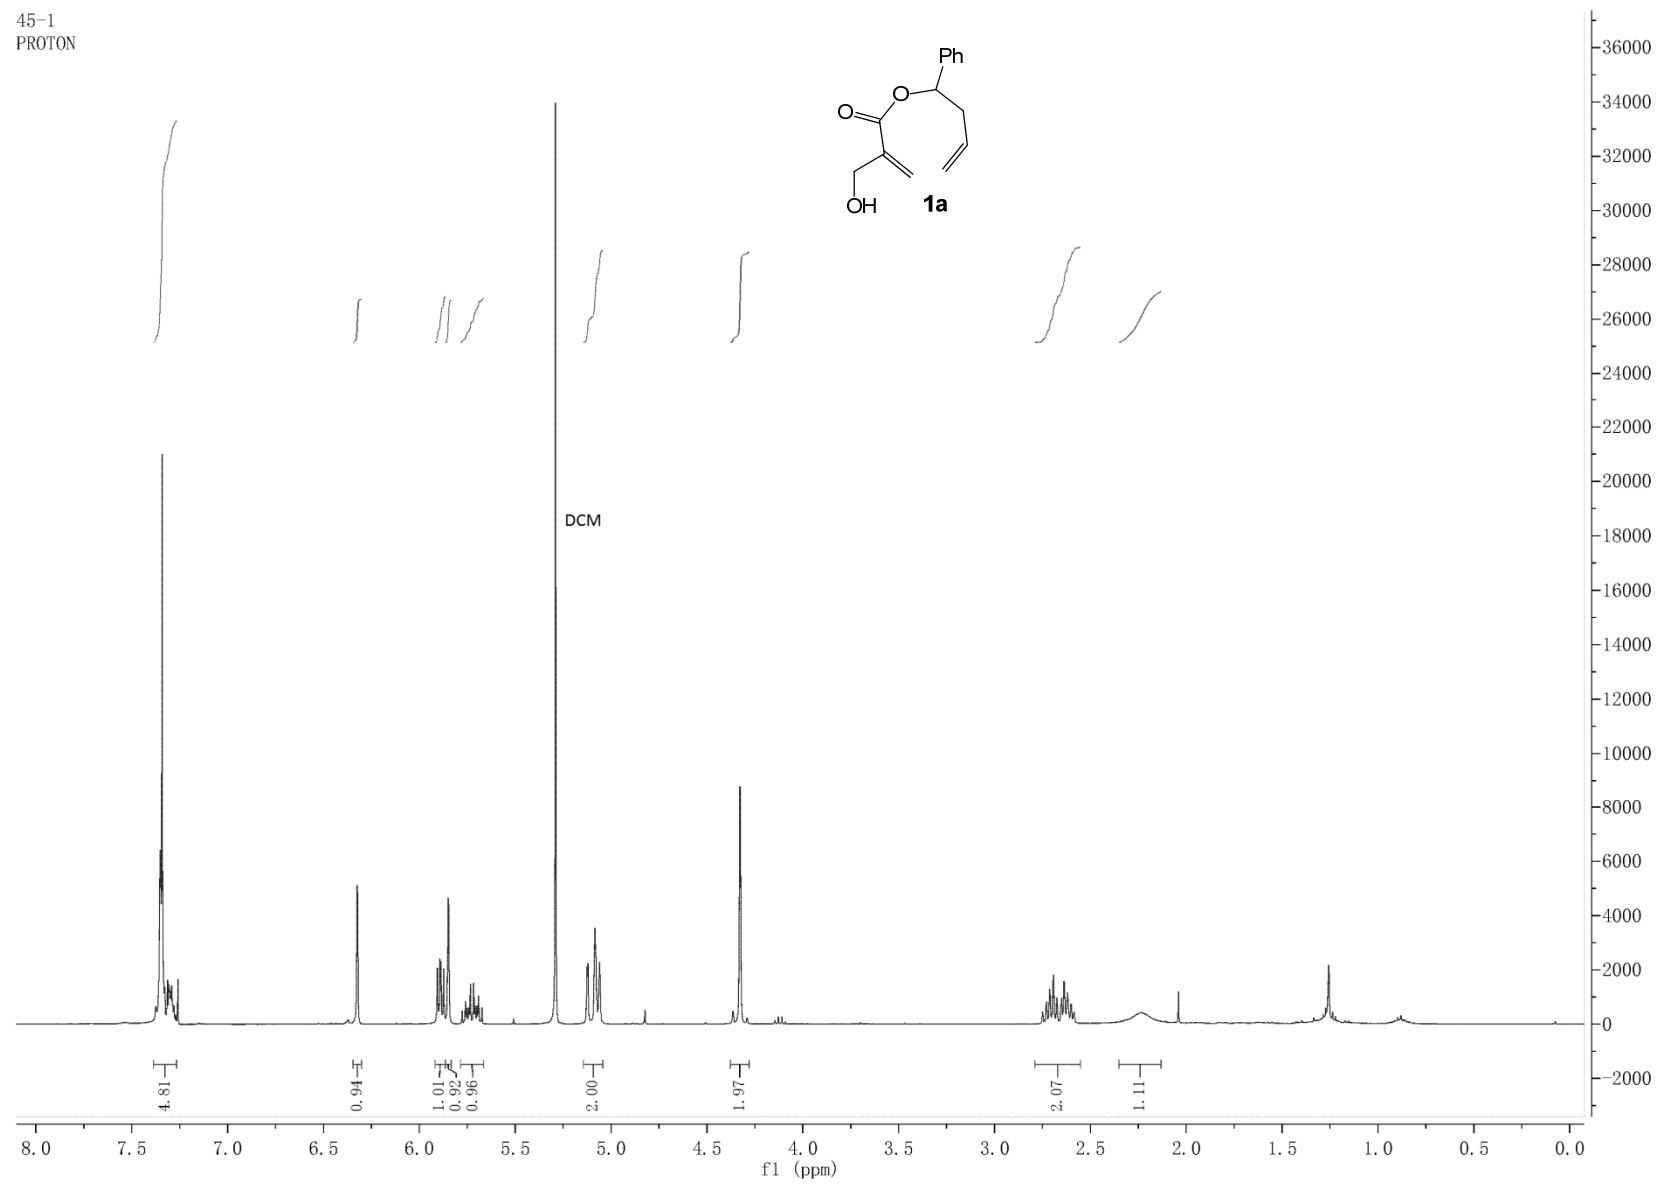

sx-39-a  
sx-39-a  
C13CPD CDC13 165.91  
p:\\ XCF 13

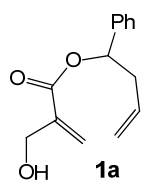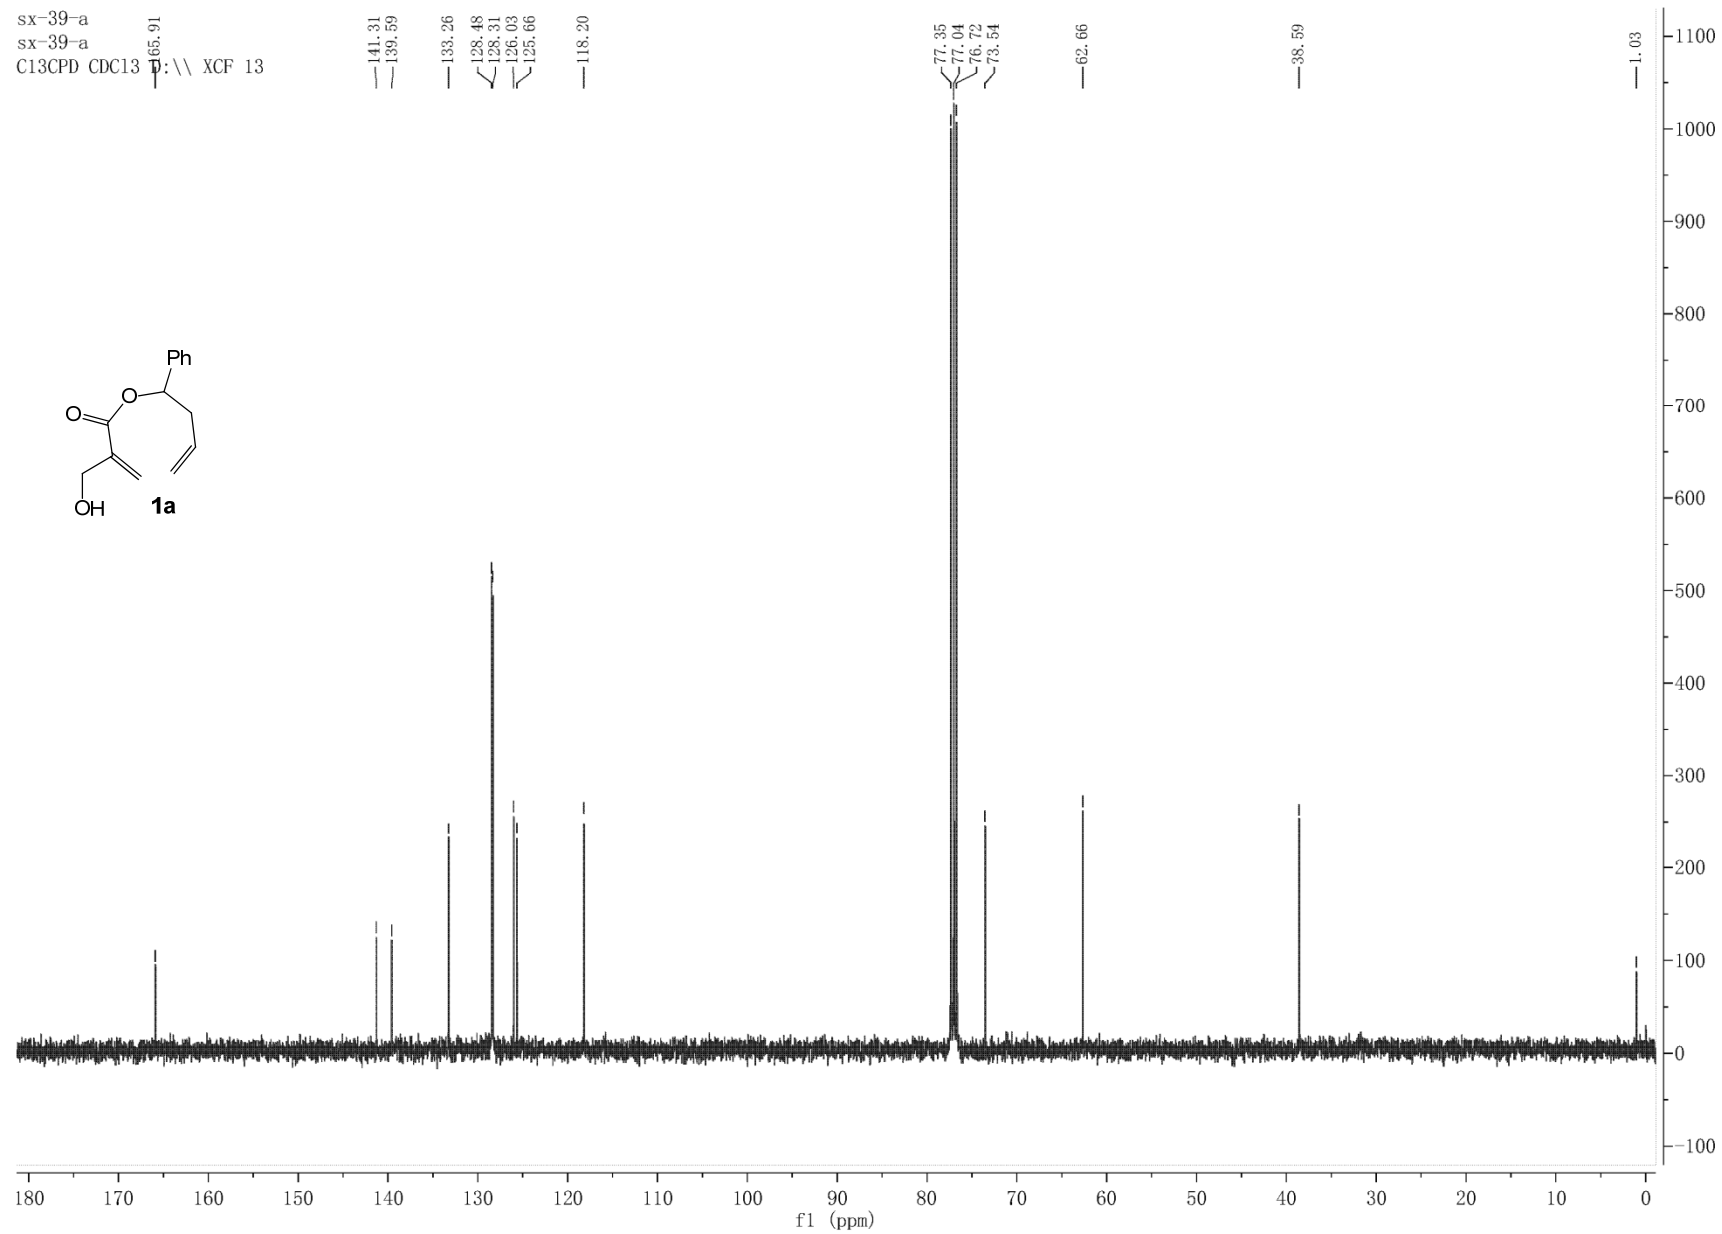

sx-40-a  
sx-40-a  
PROTON CDC13 D:\ XCF 14

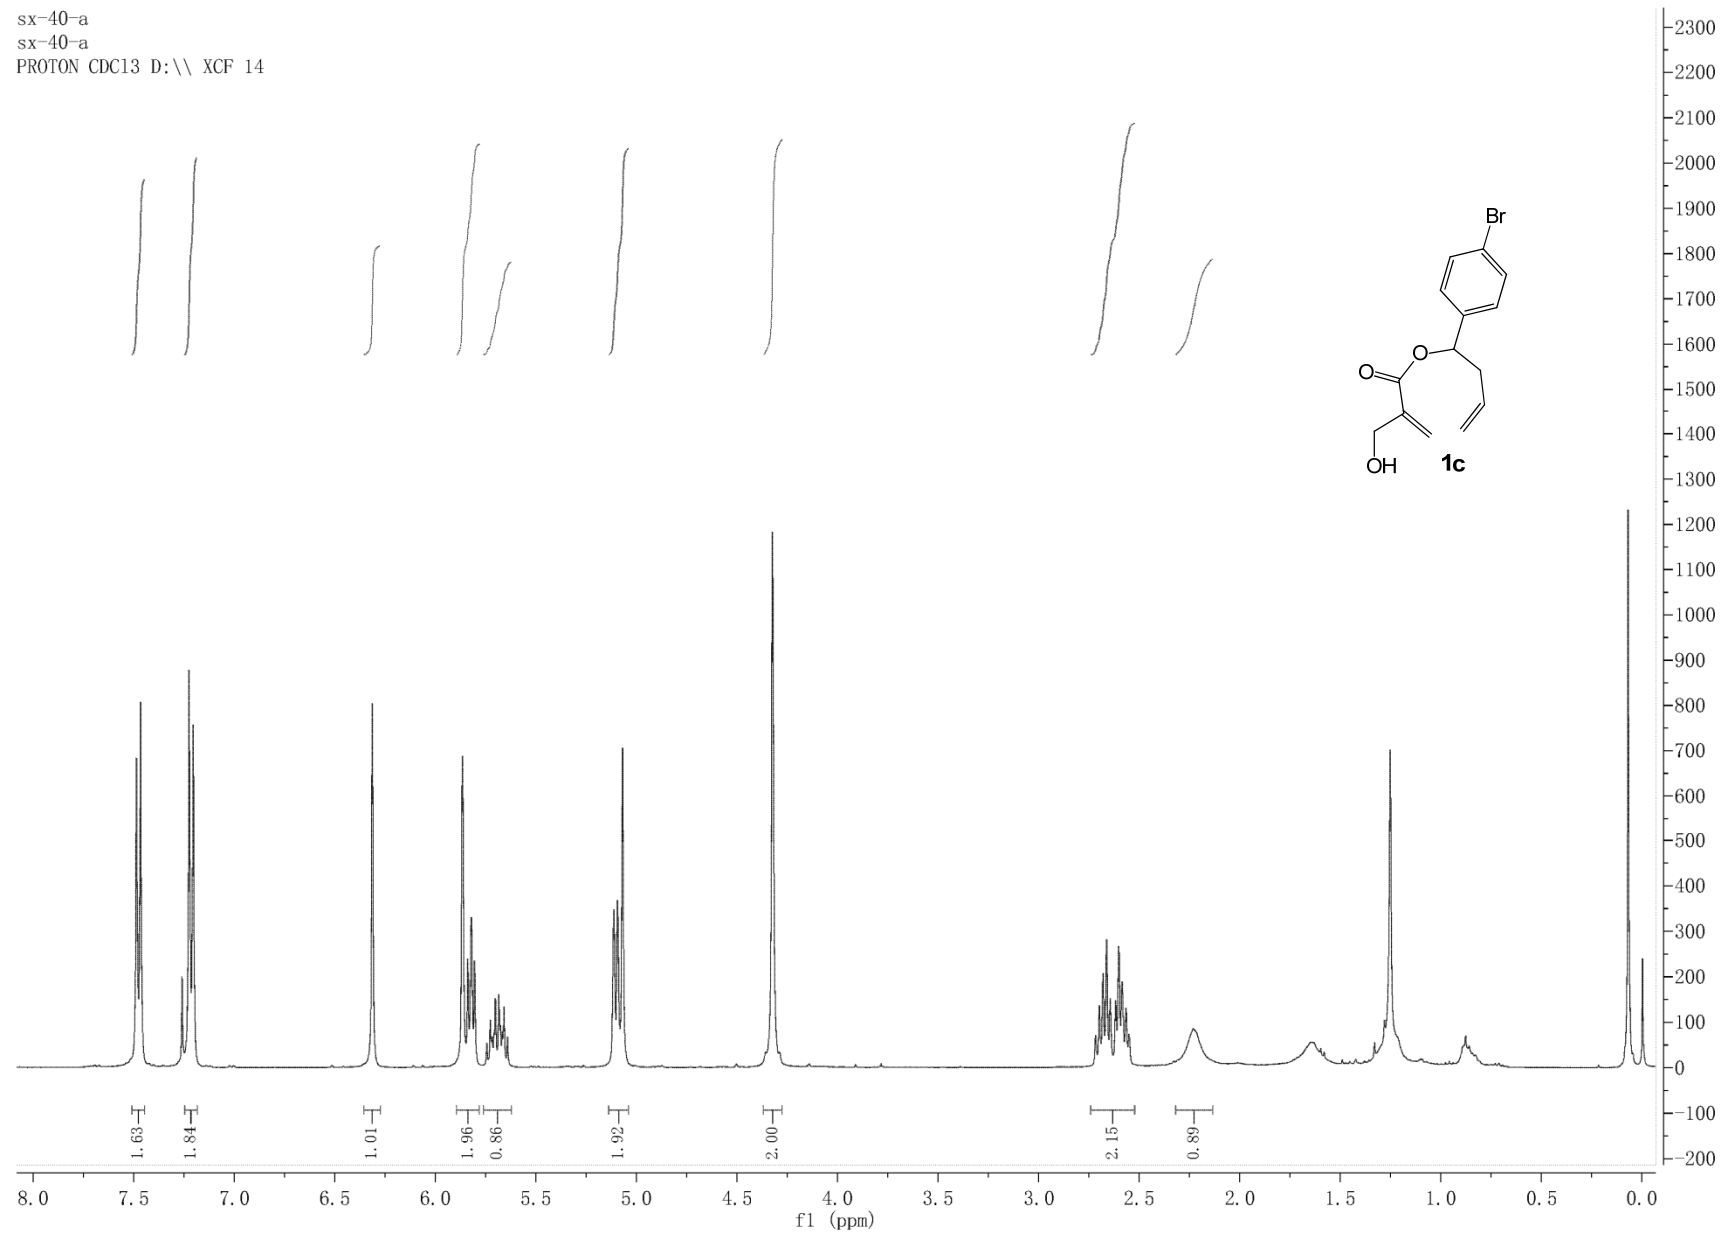

sx-40-a  
sx-40-a  
C13CPD CDC13 D7 XCF 14

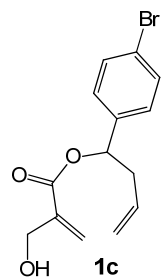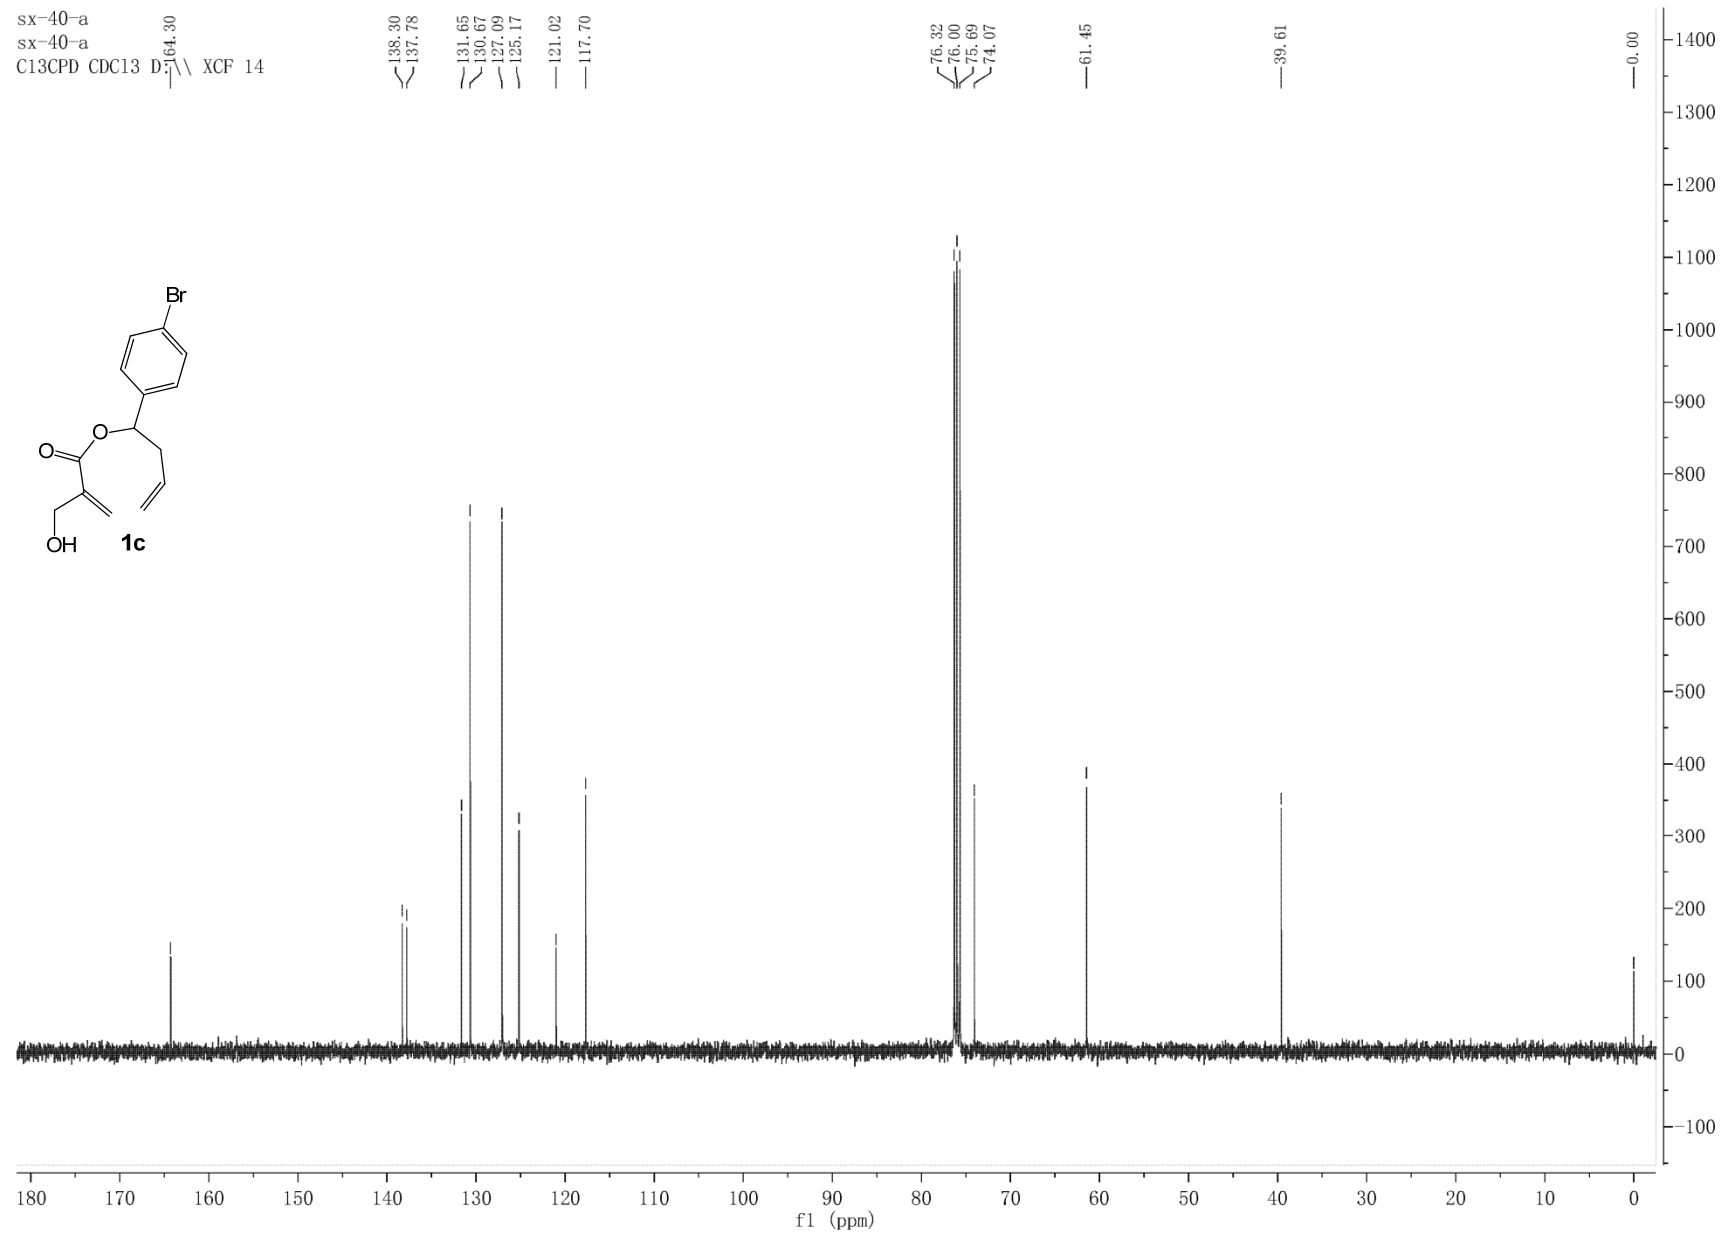

sx-aa  
sx-aa  
PROTON CDC13 D:\ XCF 16

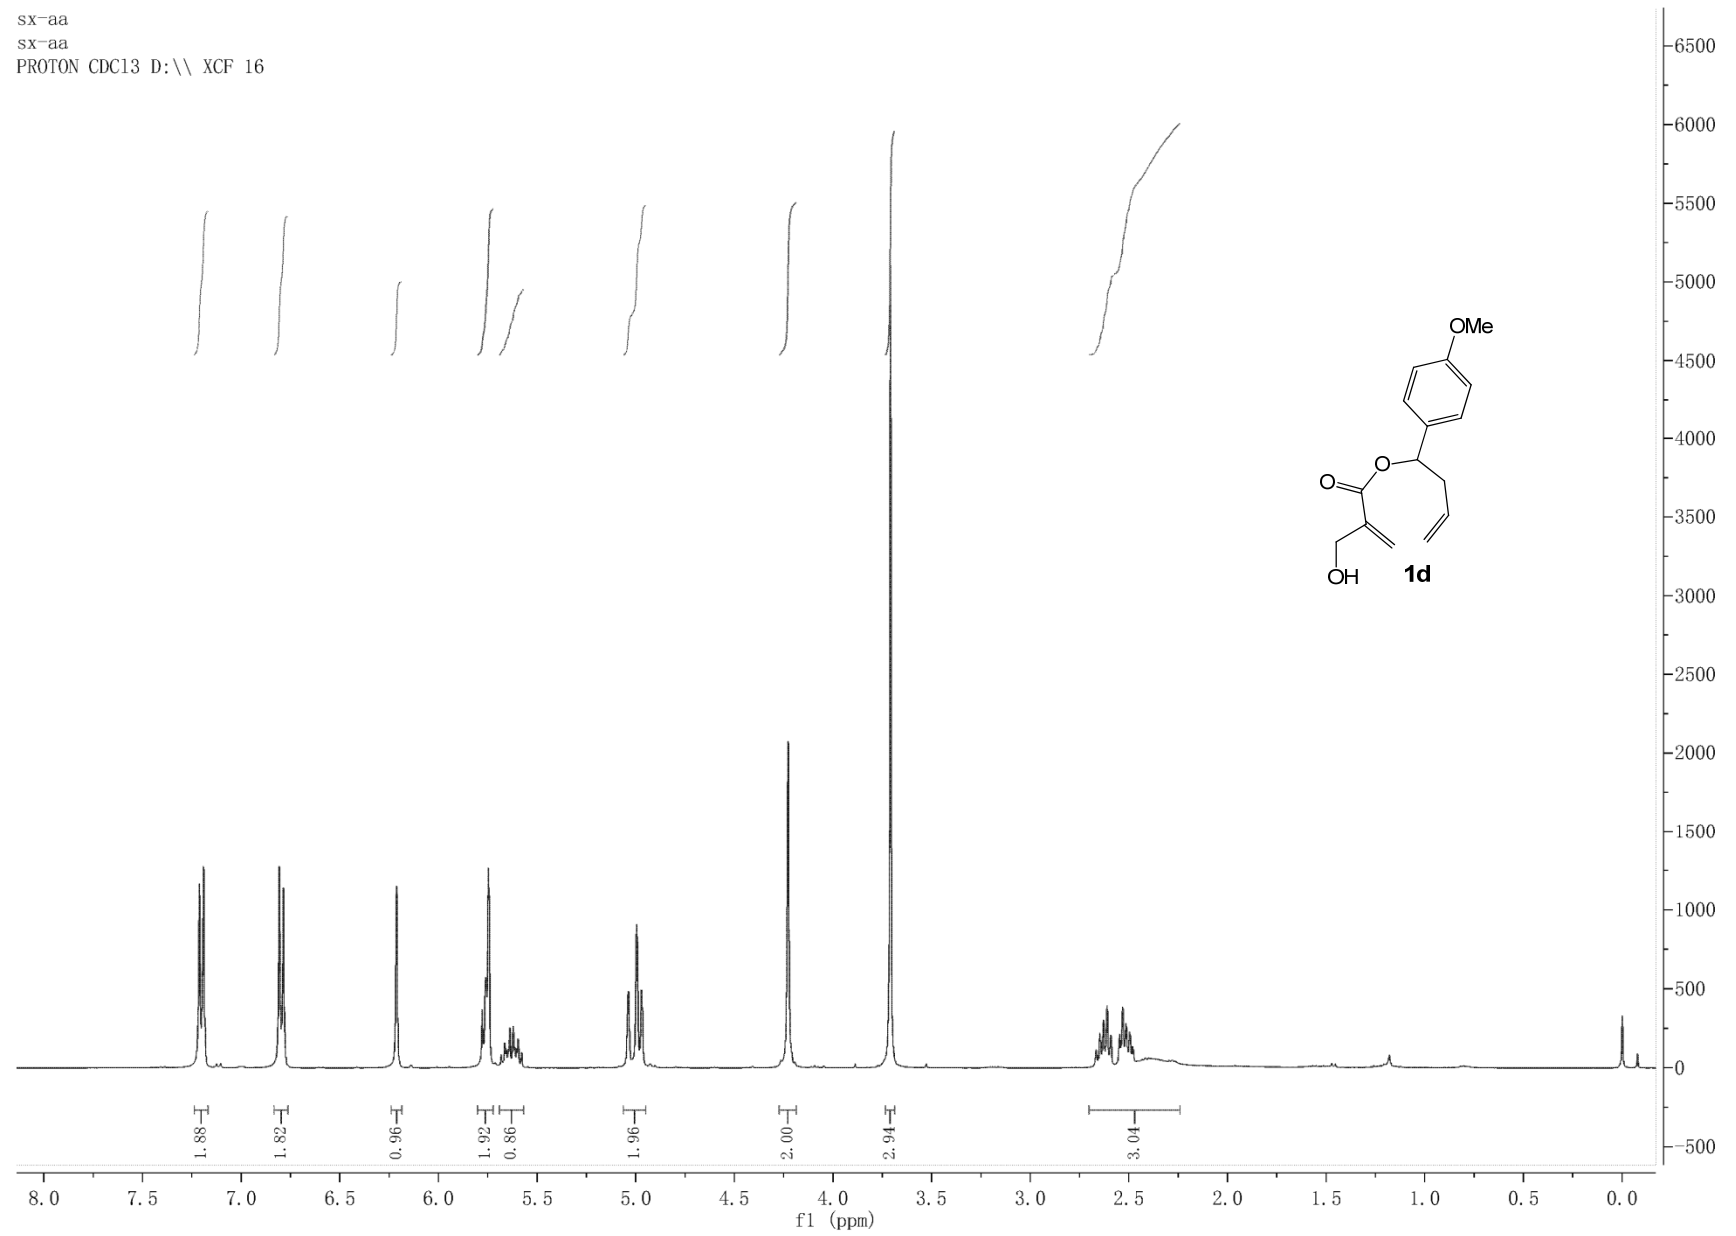

sx-aa  
sx-aa  
C13CPD CDC13  
165.50  
159.39  
XCF 16

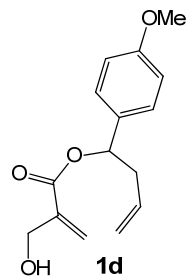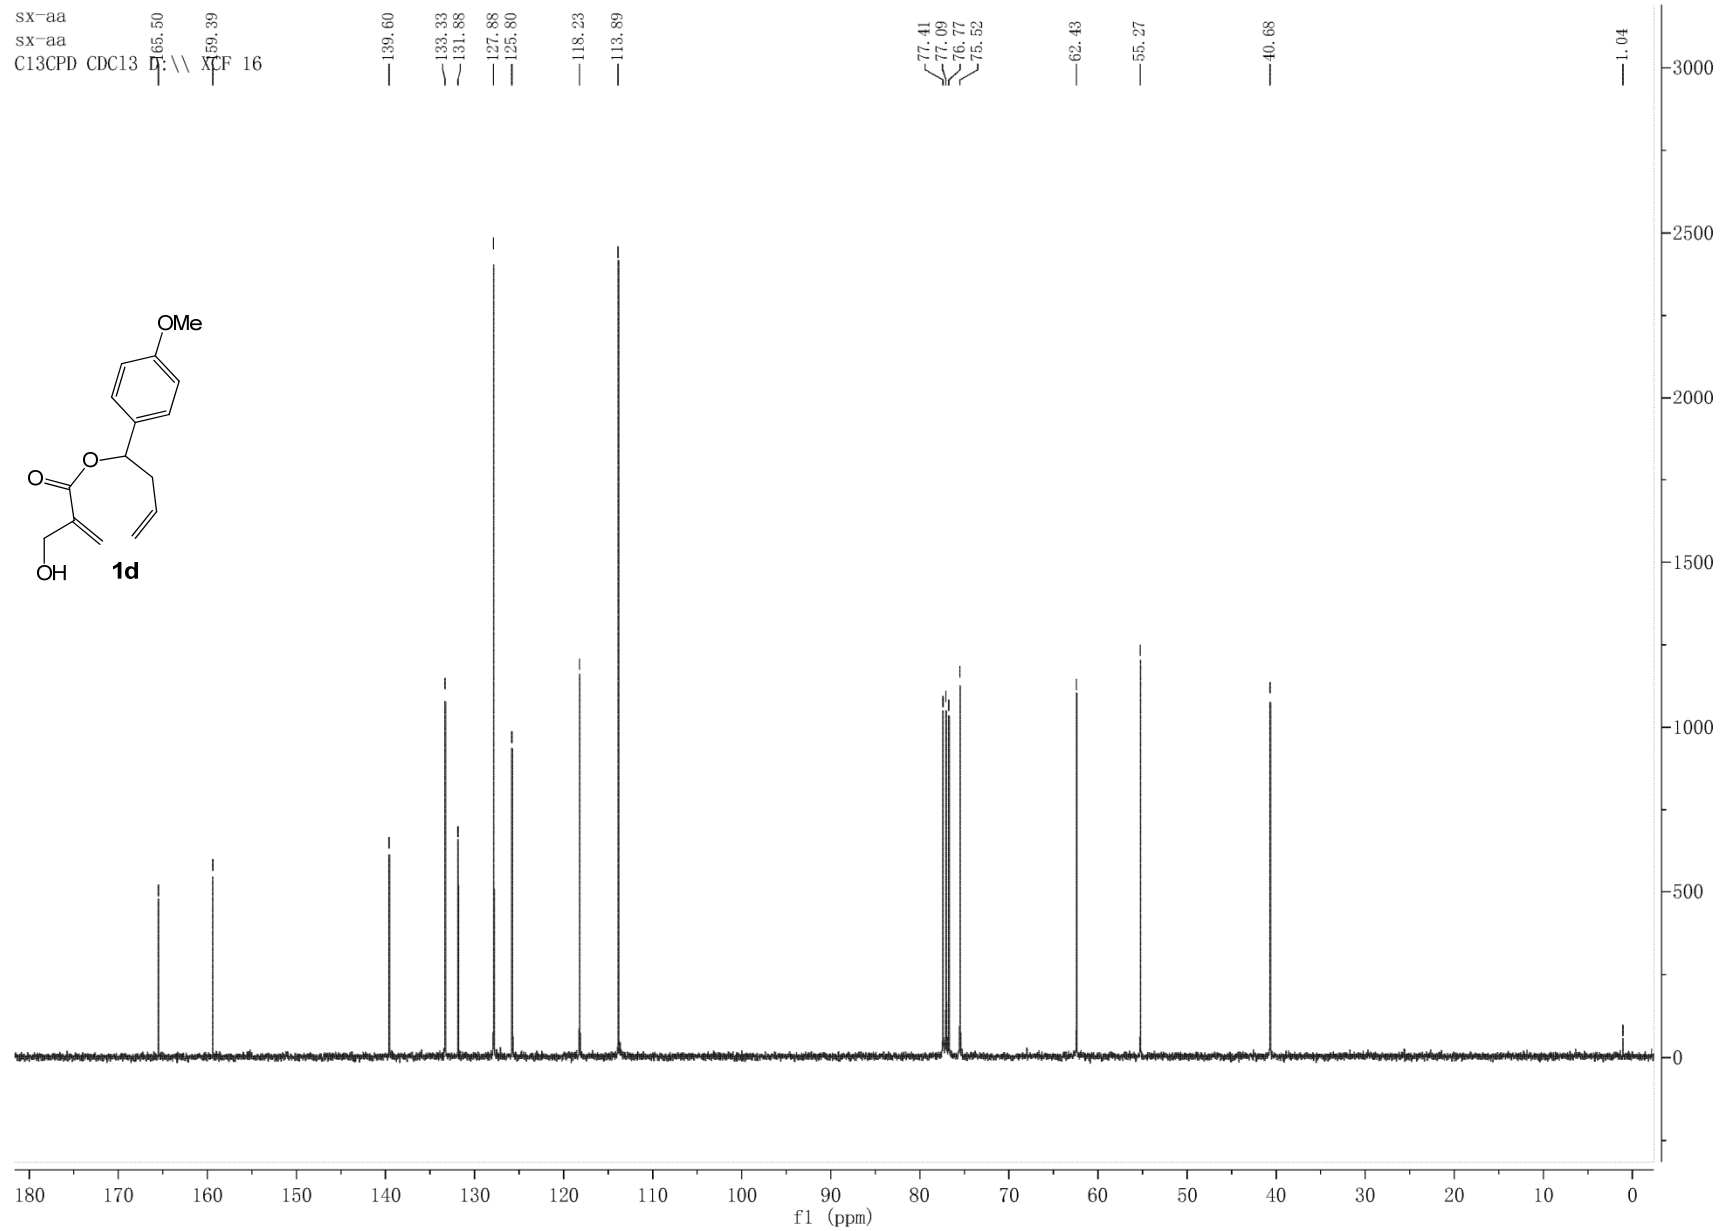

sx-bbmmr  
sx-bbmmr  
PROTON CDC13 D:\ XCF 18

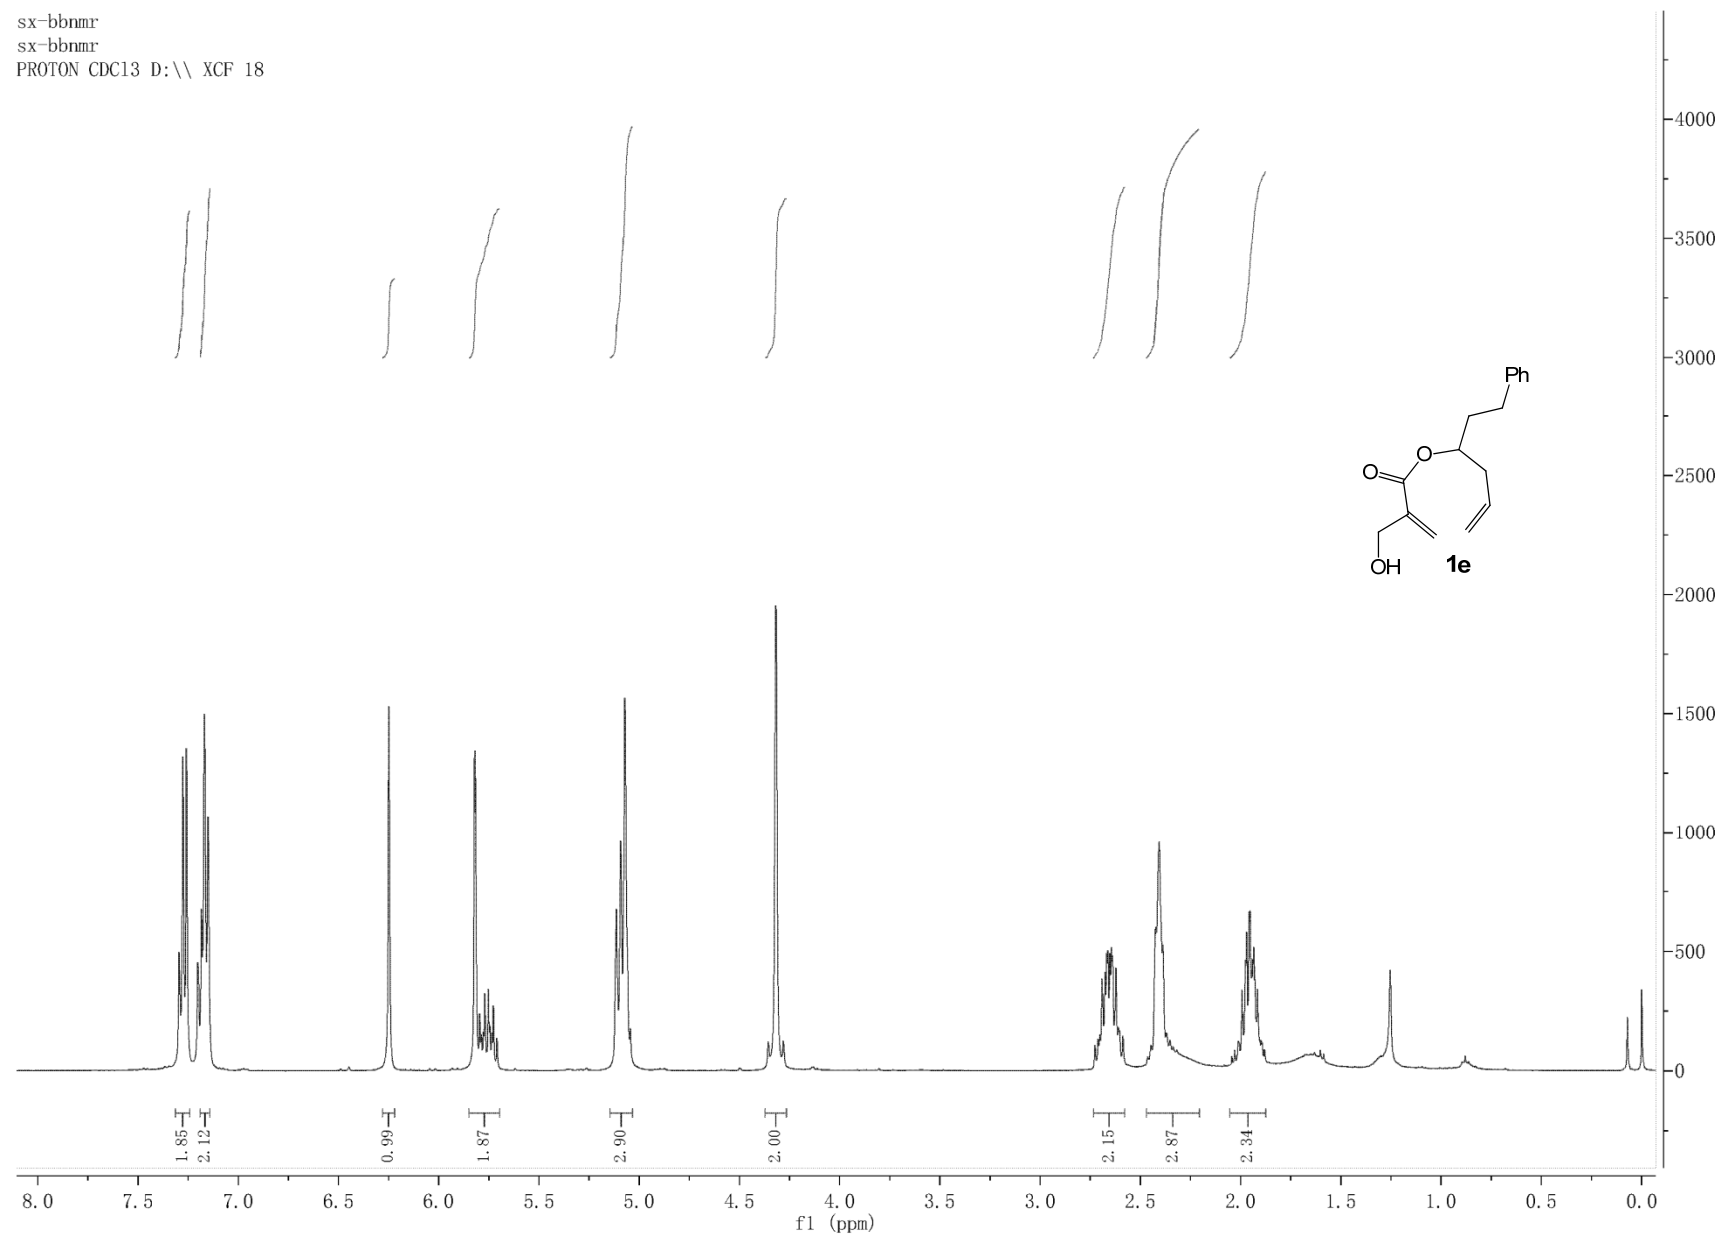



sx-bbnmr  
sx-bbnmr  
C13CPD CDC13 65.93  
D:\\ XCF 18

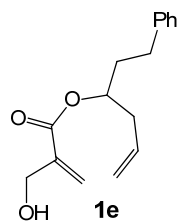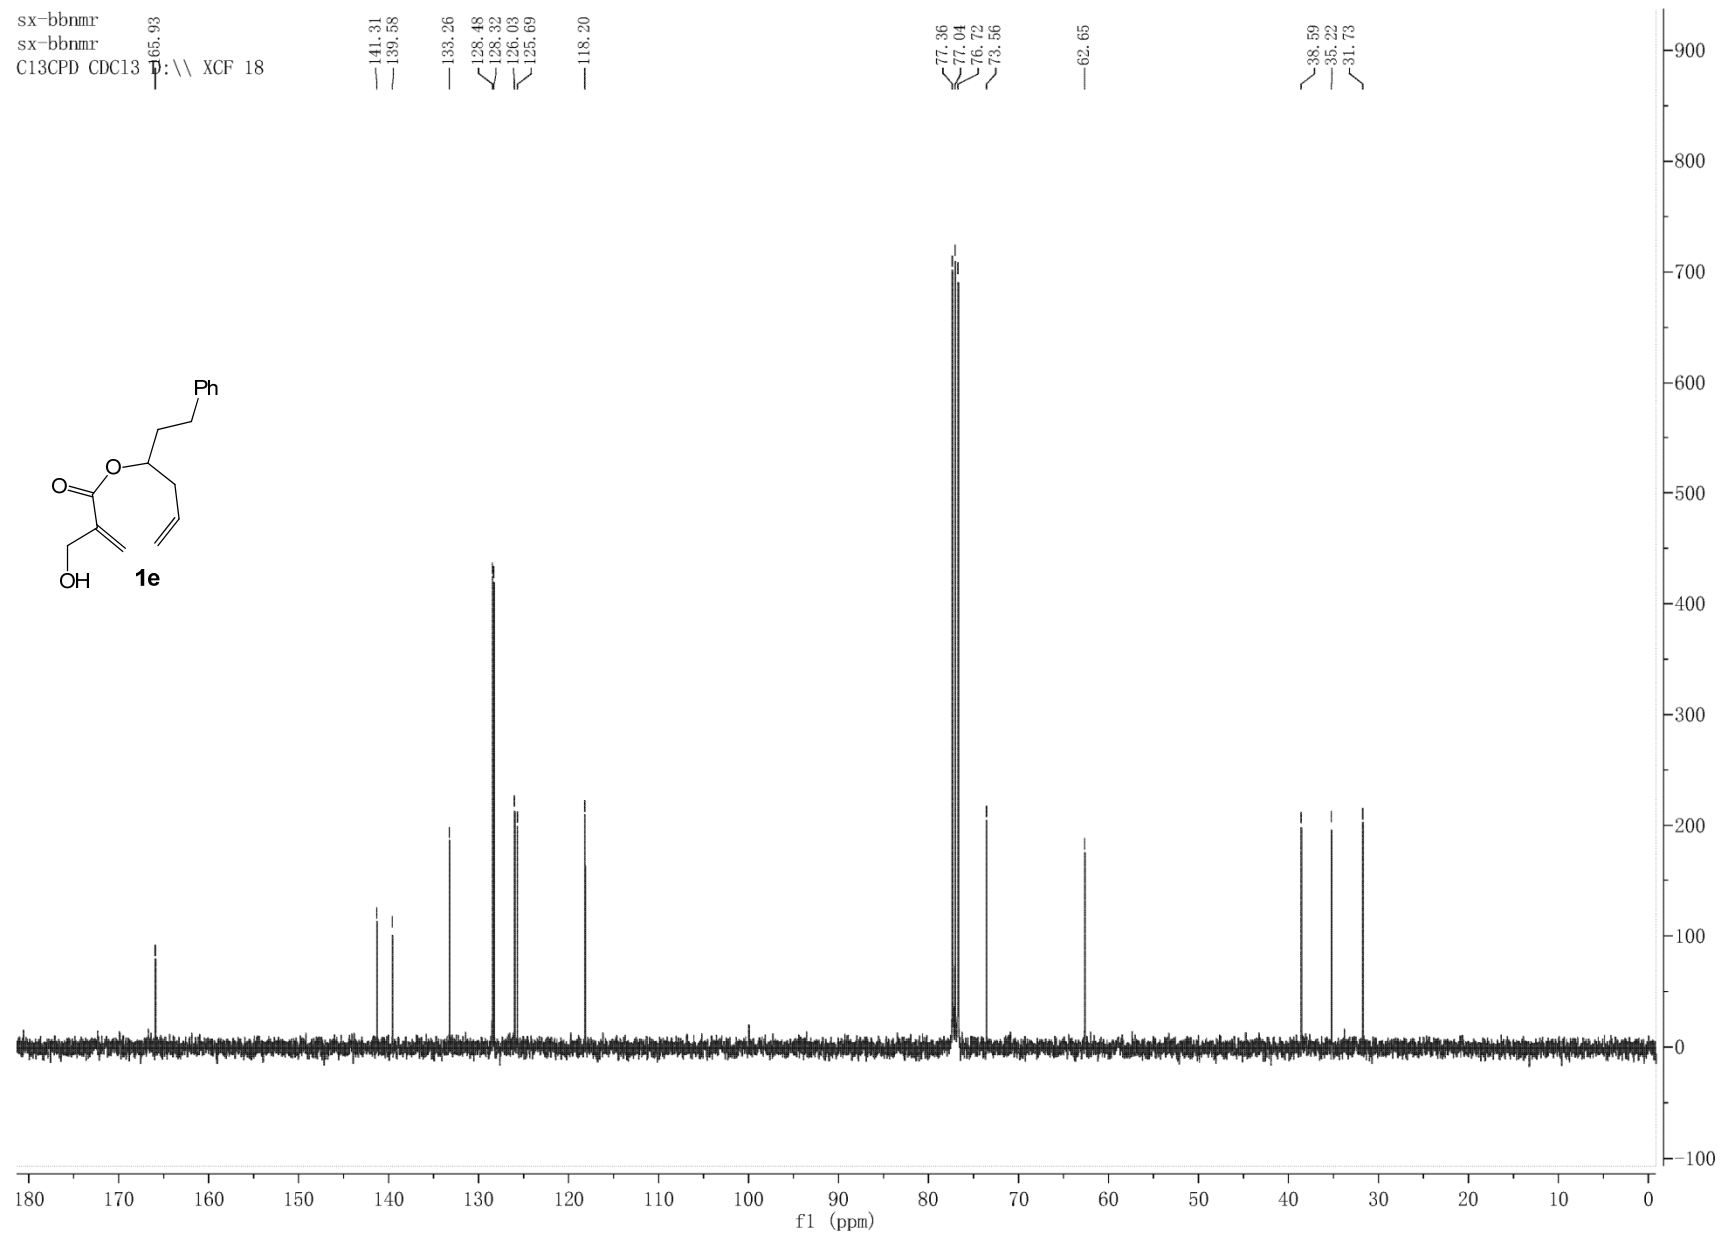

sx-p-a  
sx-p-a  
PROTON CDC13 D:\ XCF 18

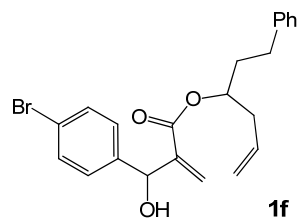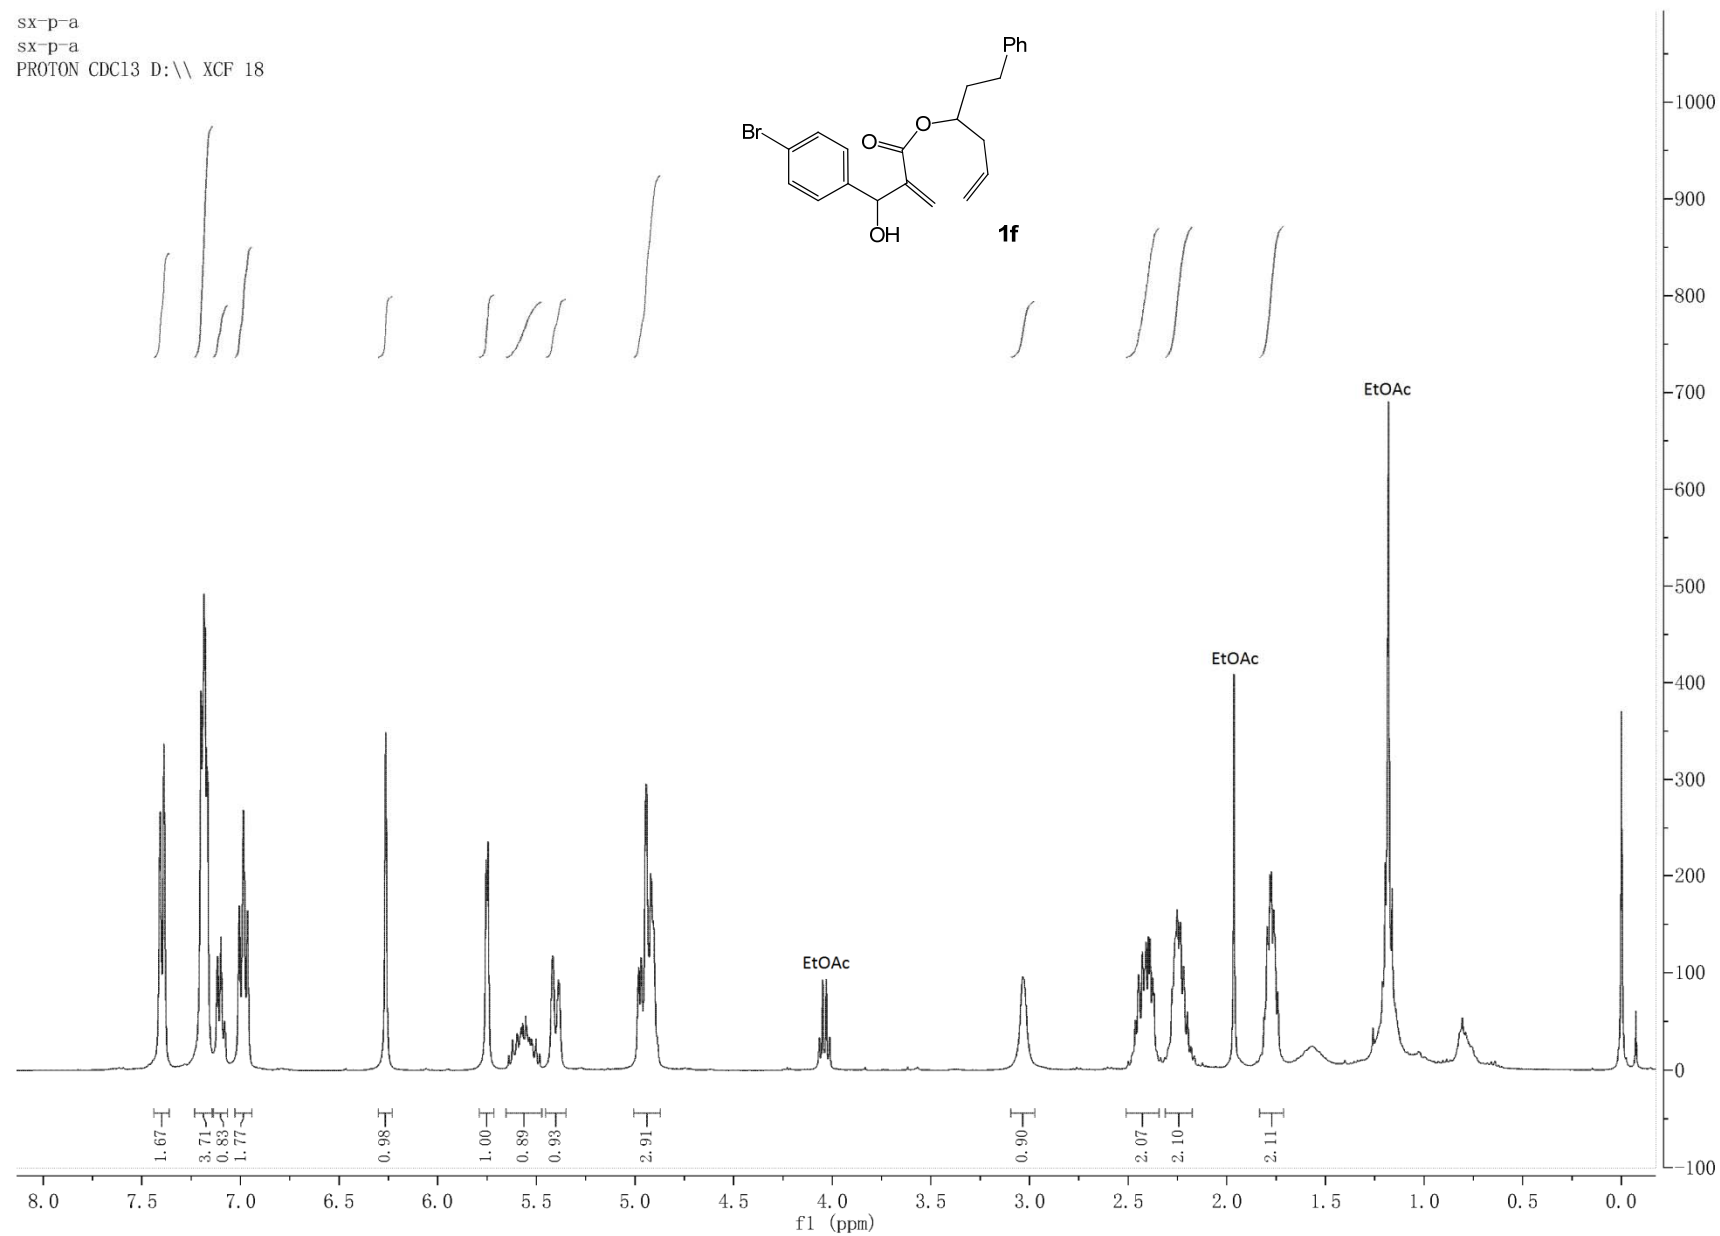

sx-p-a  
sx-p-a  
C13CPD CDC13 XCF 18

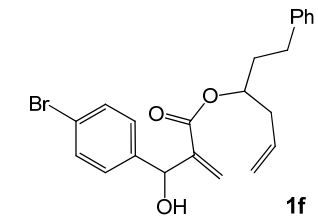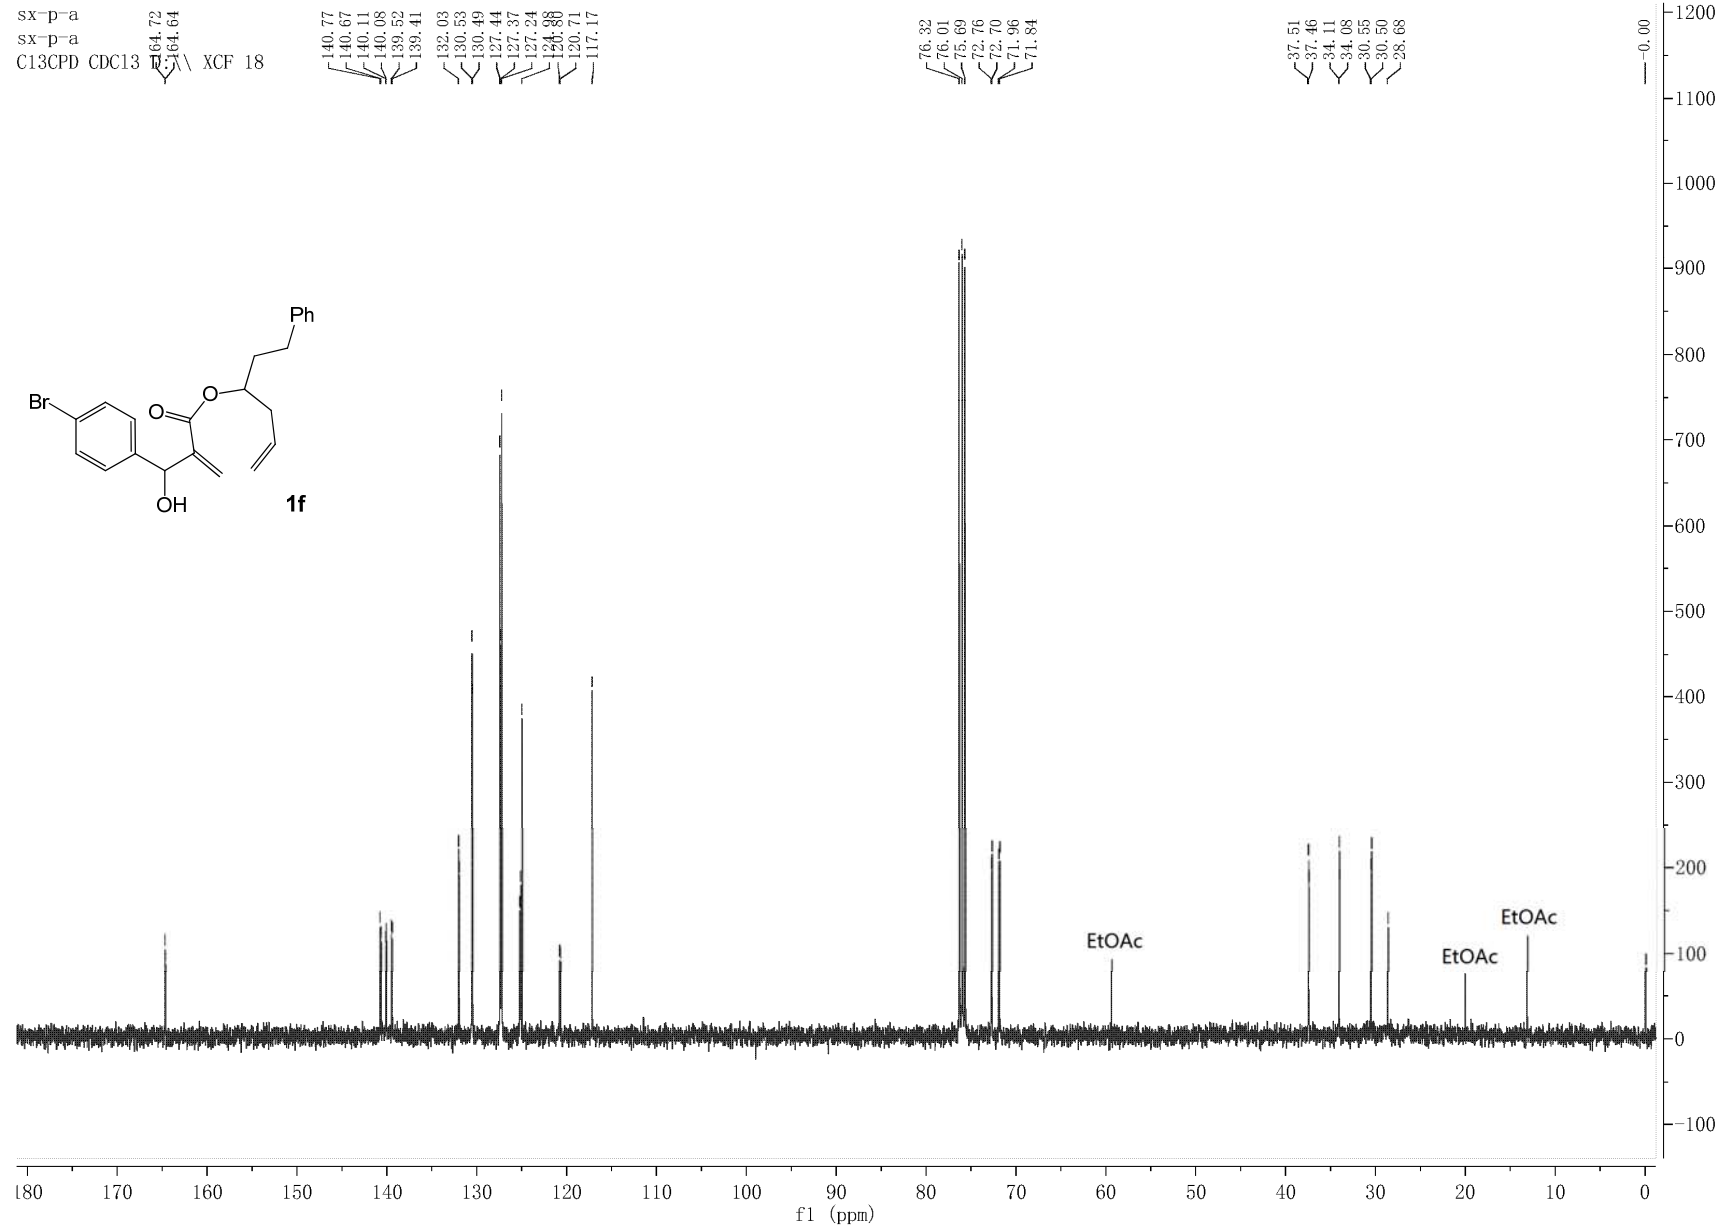

KUST-645  
PROTON

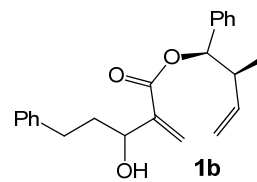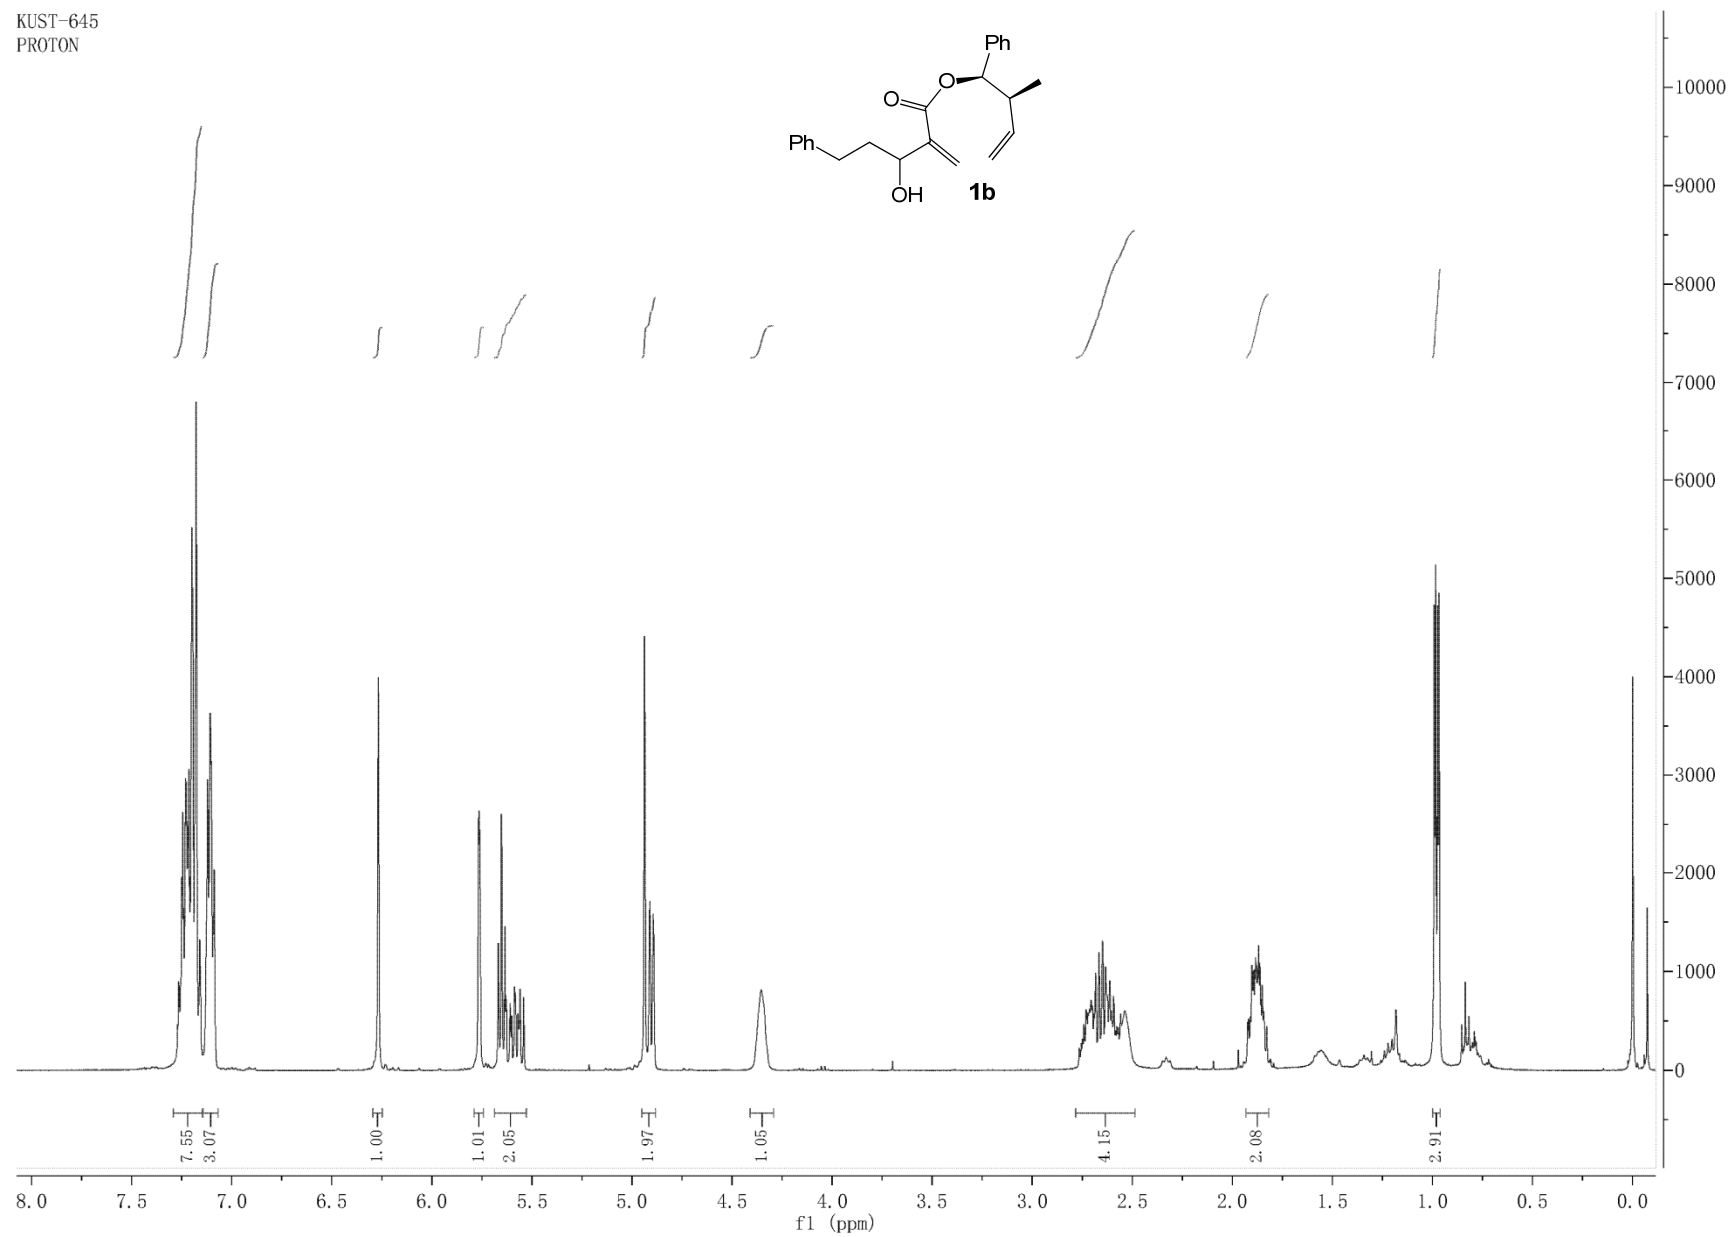

KUST-549  
C13CPD

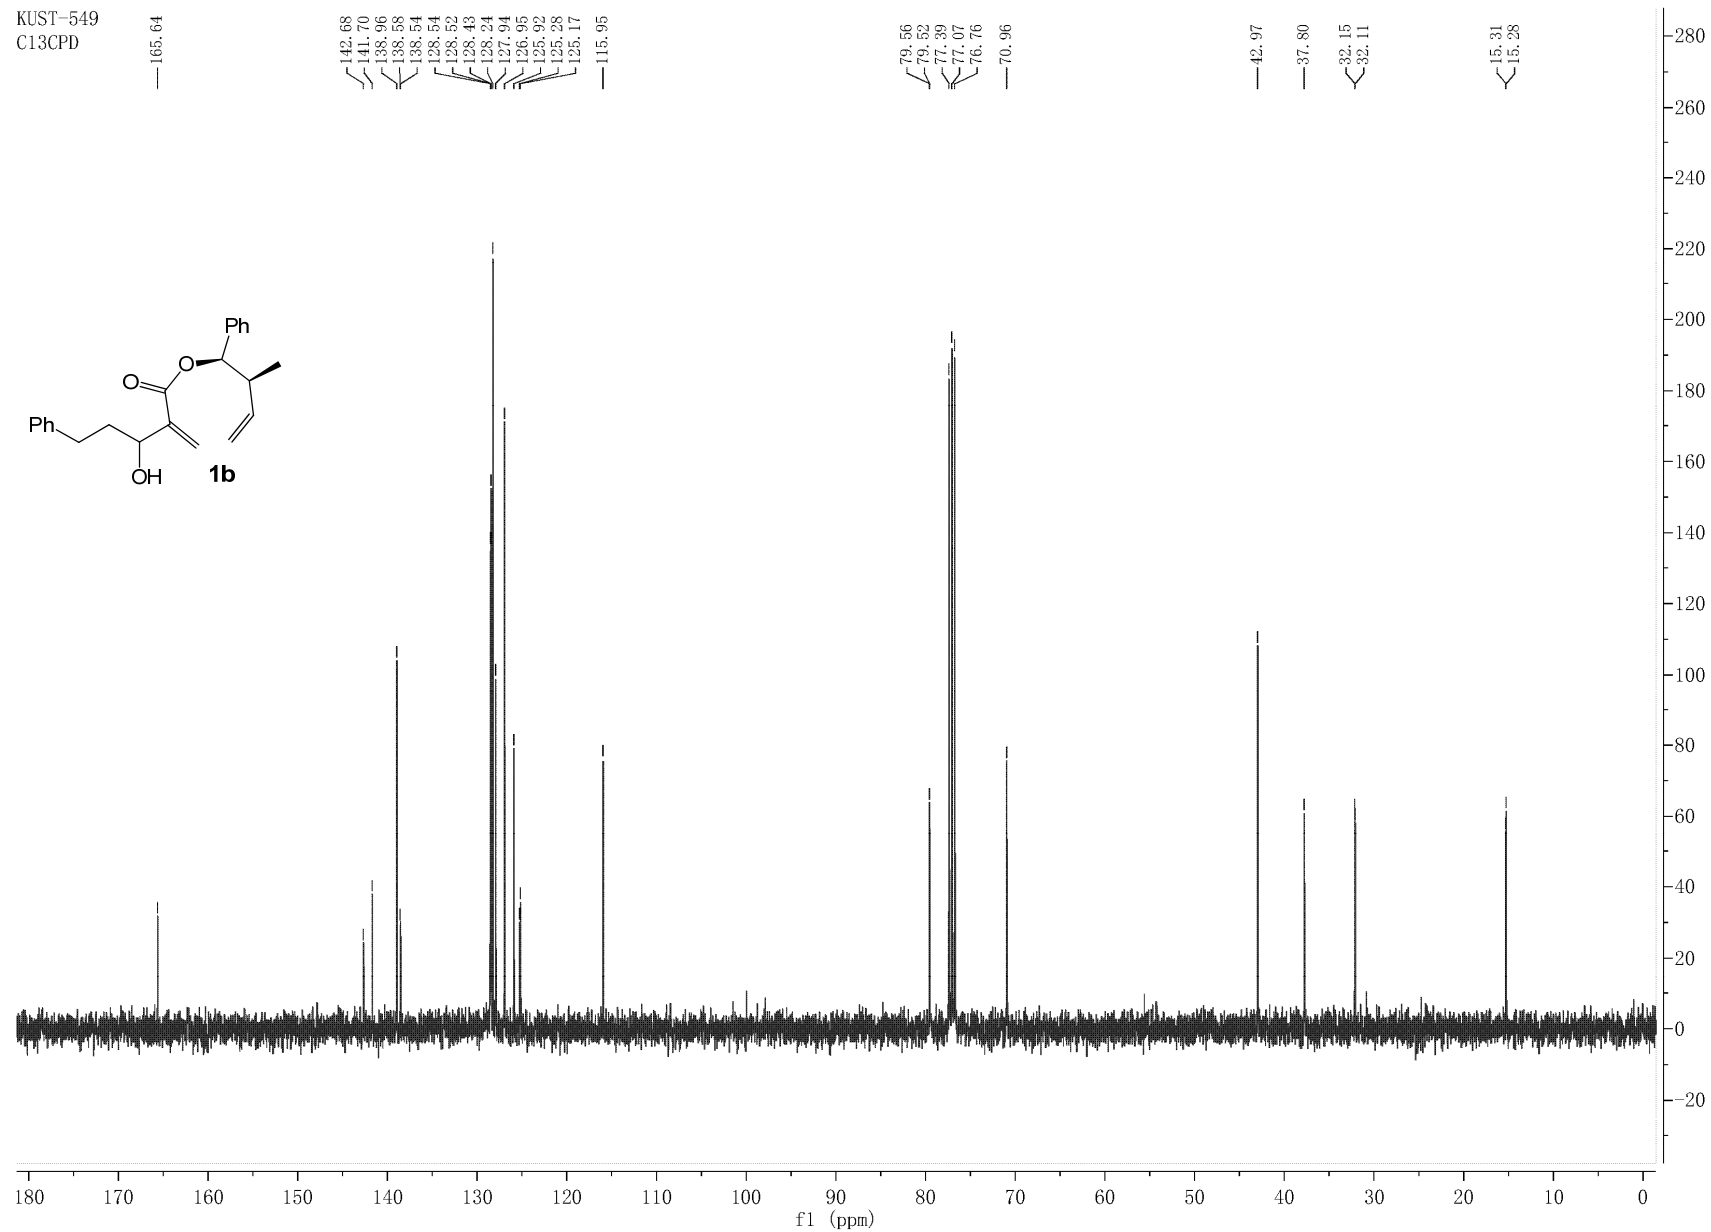

2014753-f1-k02hh\_pslabel\_01  
Gradient Shimming

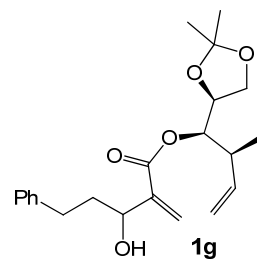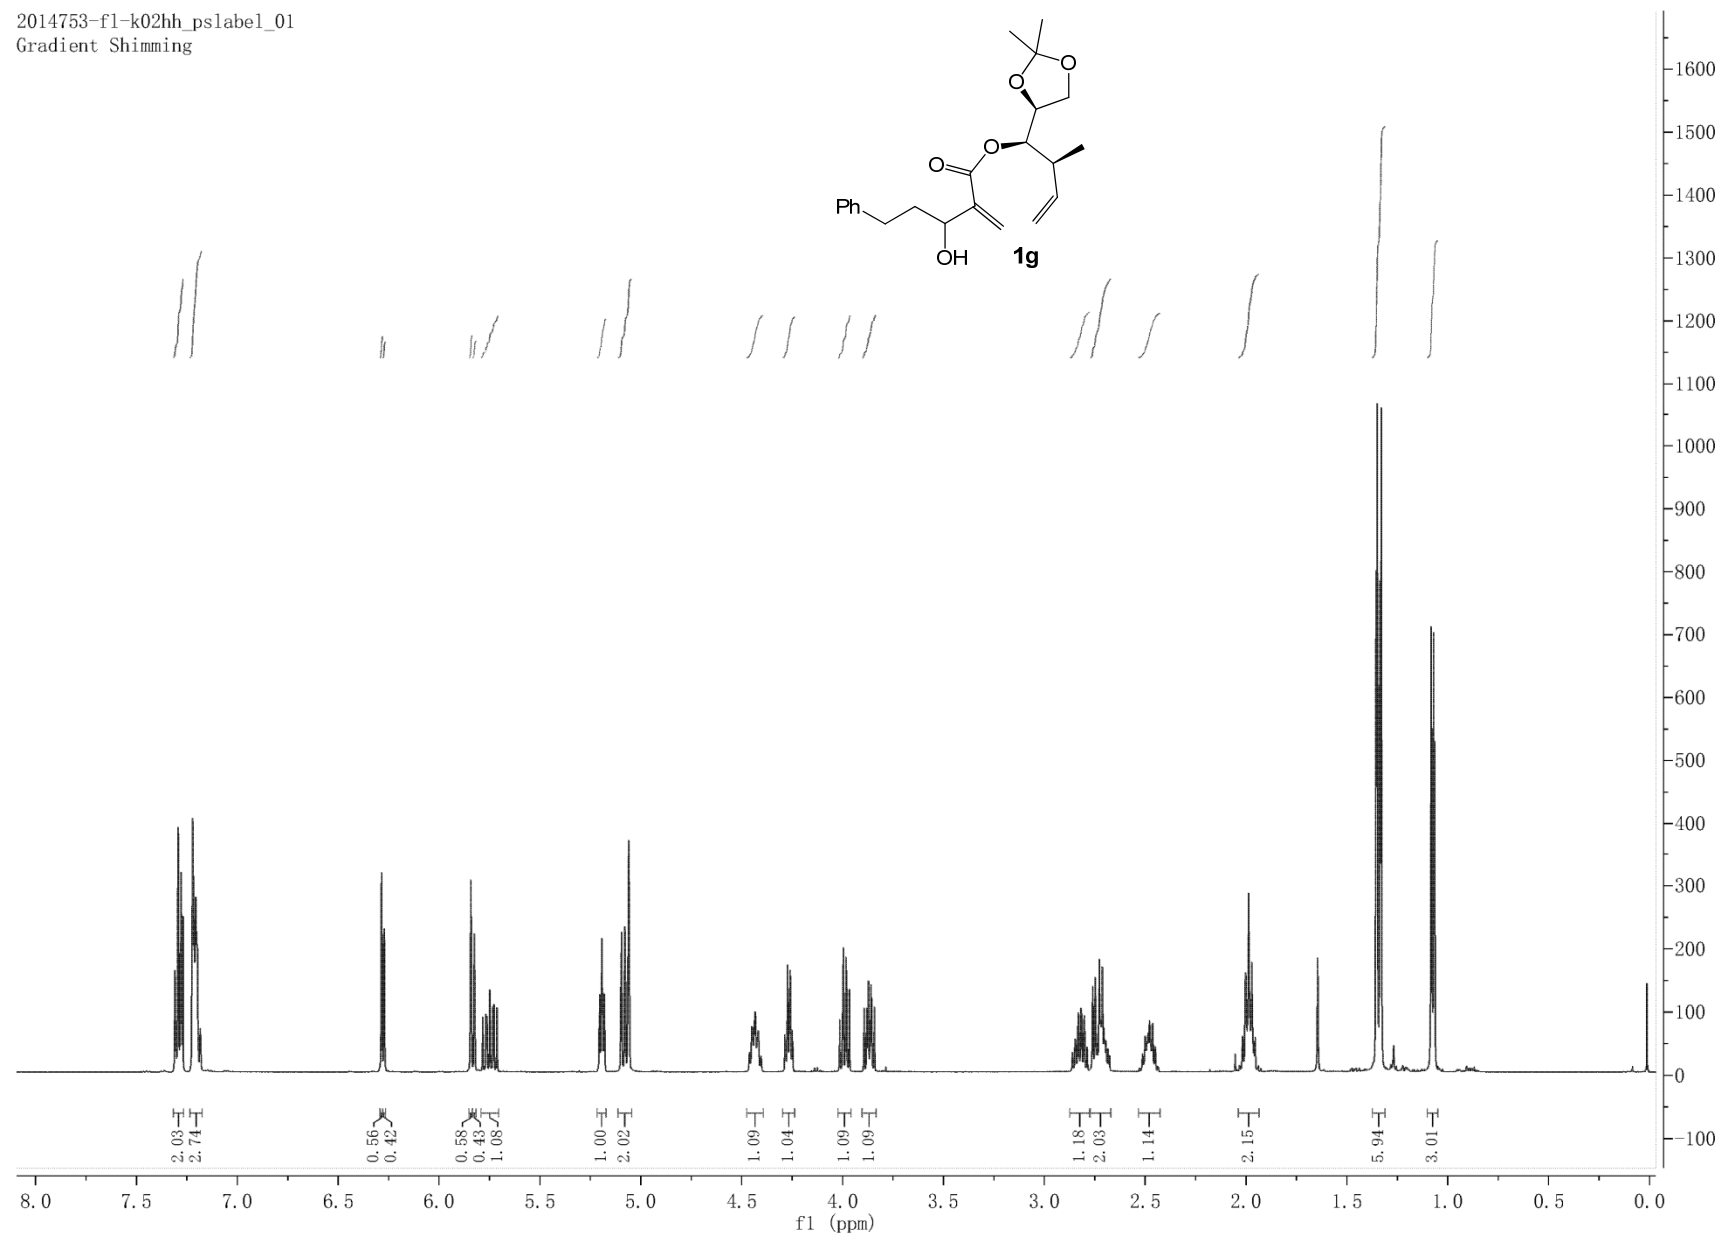

2014753-f1-k026\_pslabel\_01  
Gradient Shimming

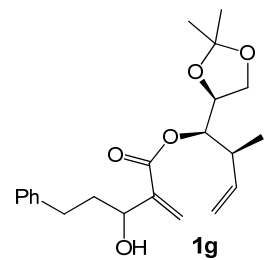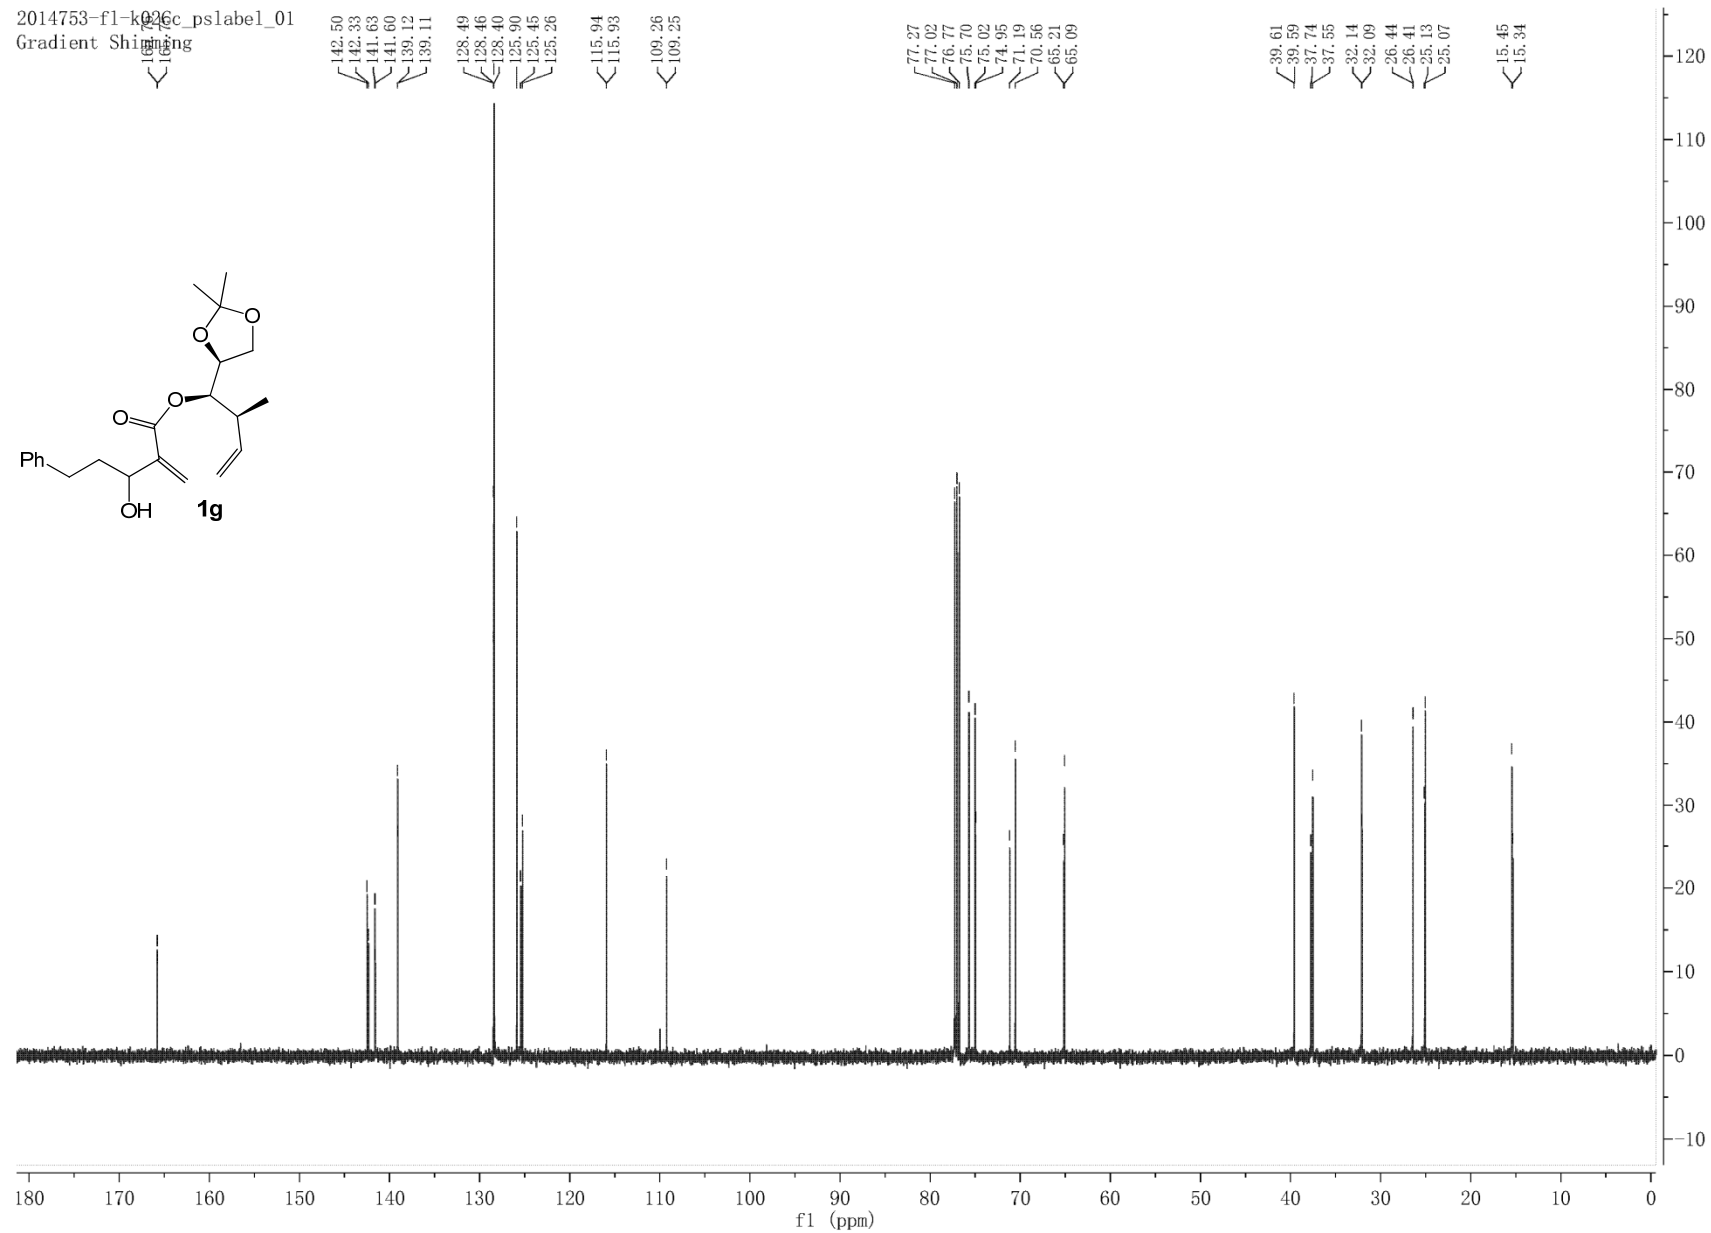

KUST-767  
PROTON

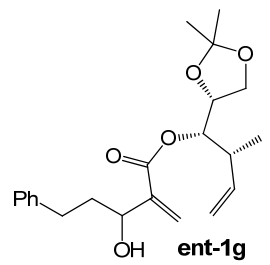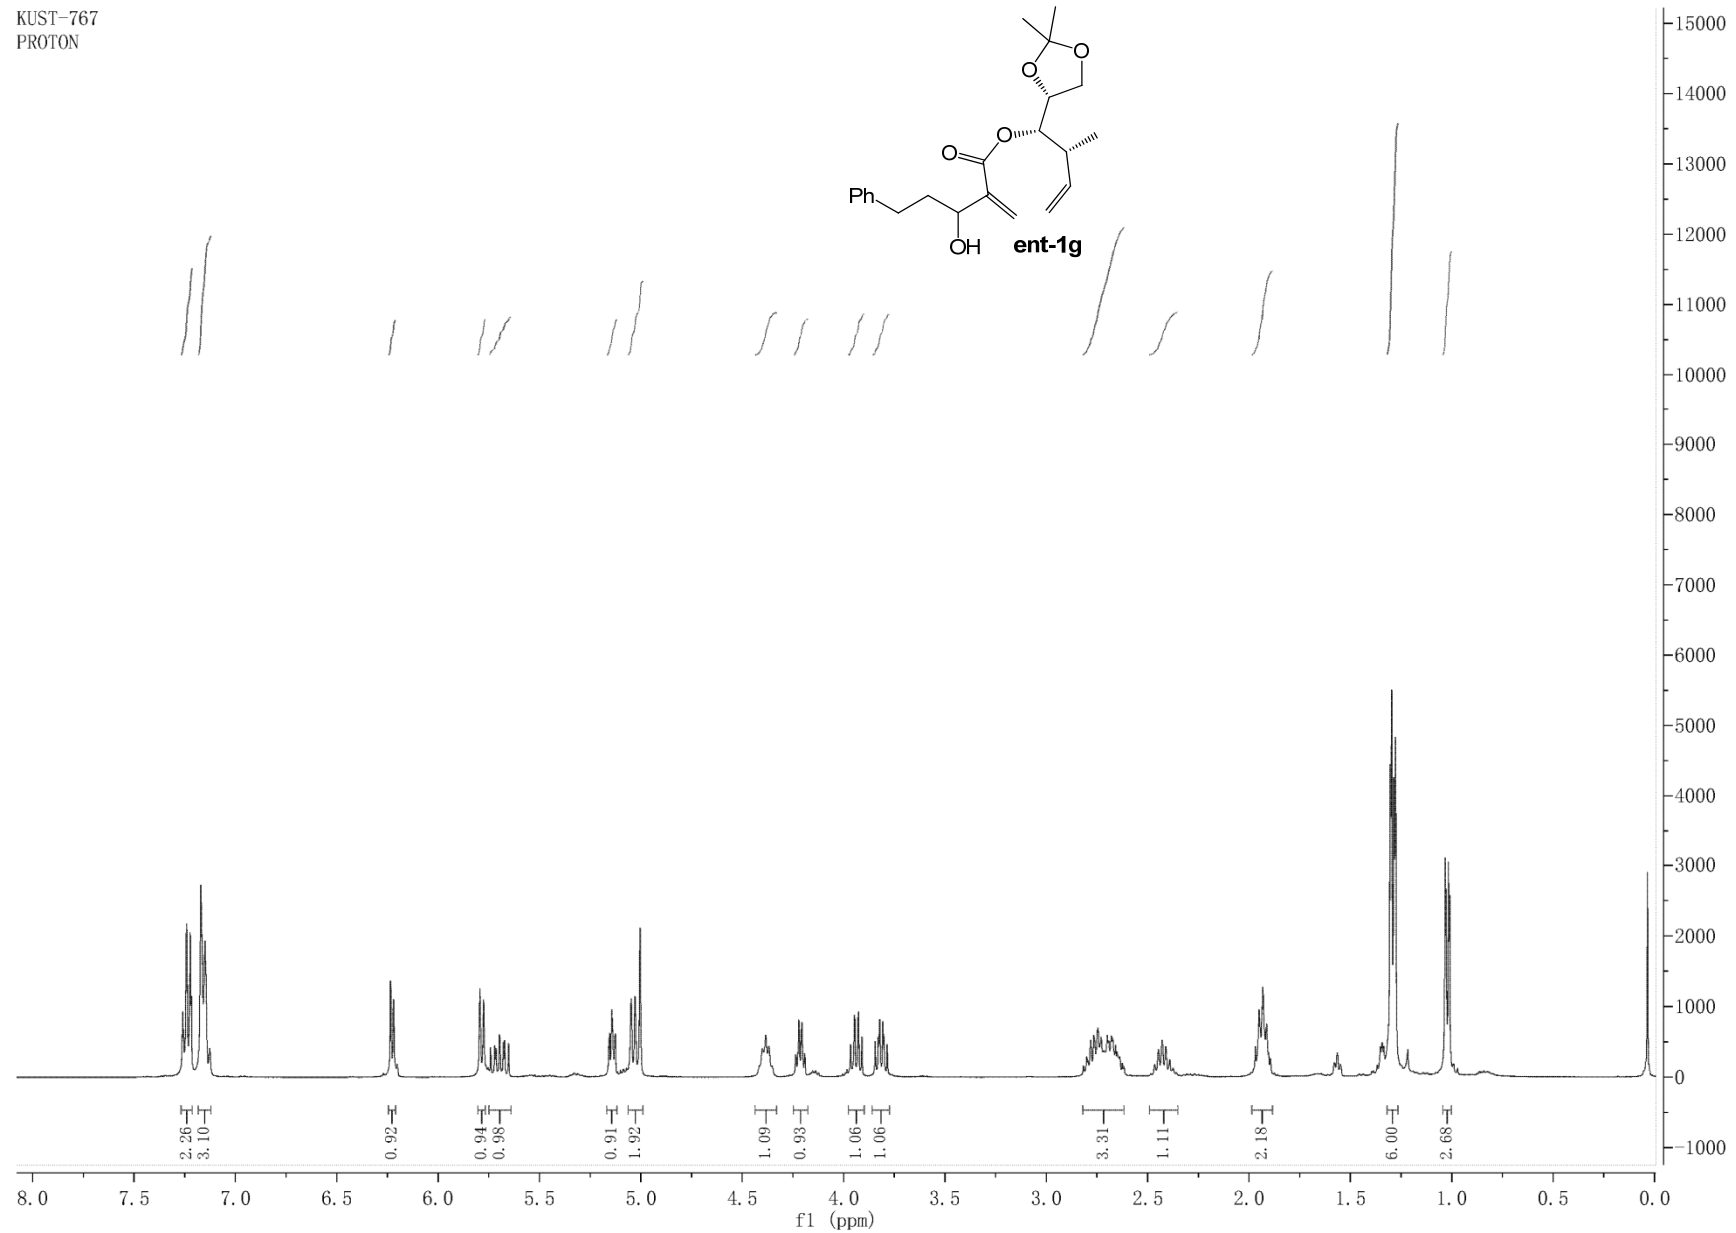



KUST-767  
C13CPD

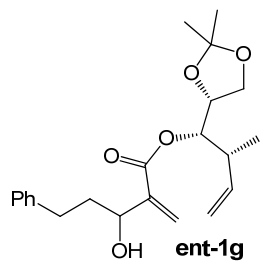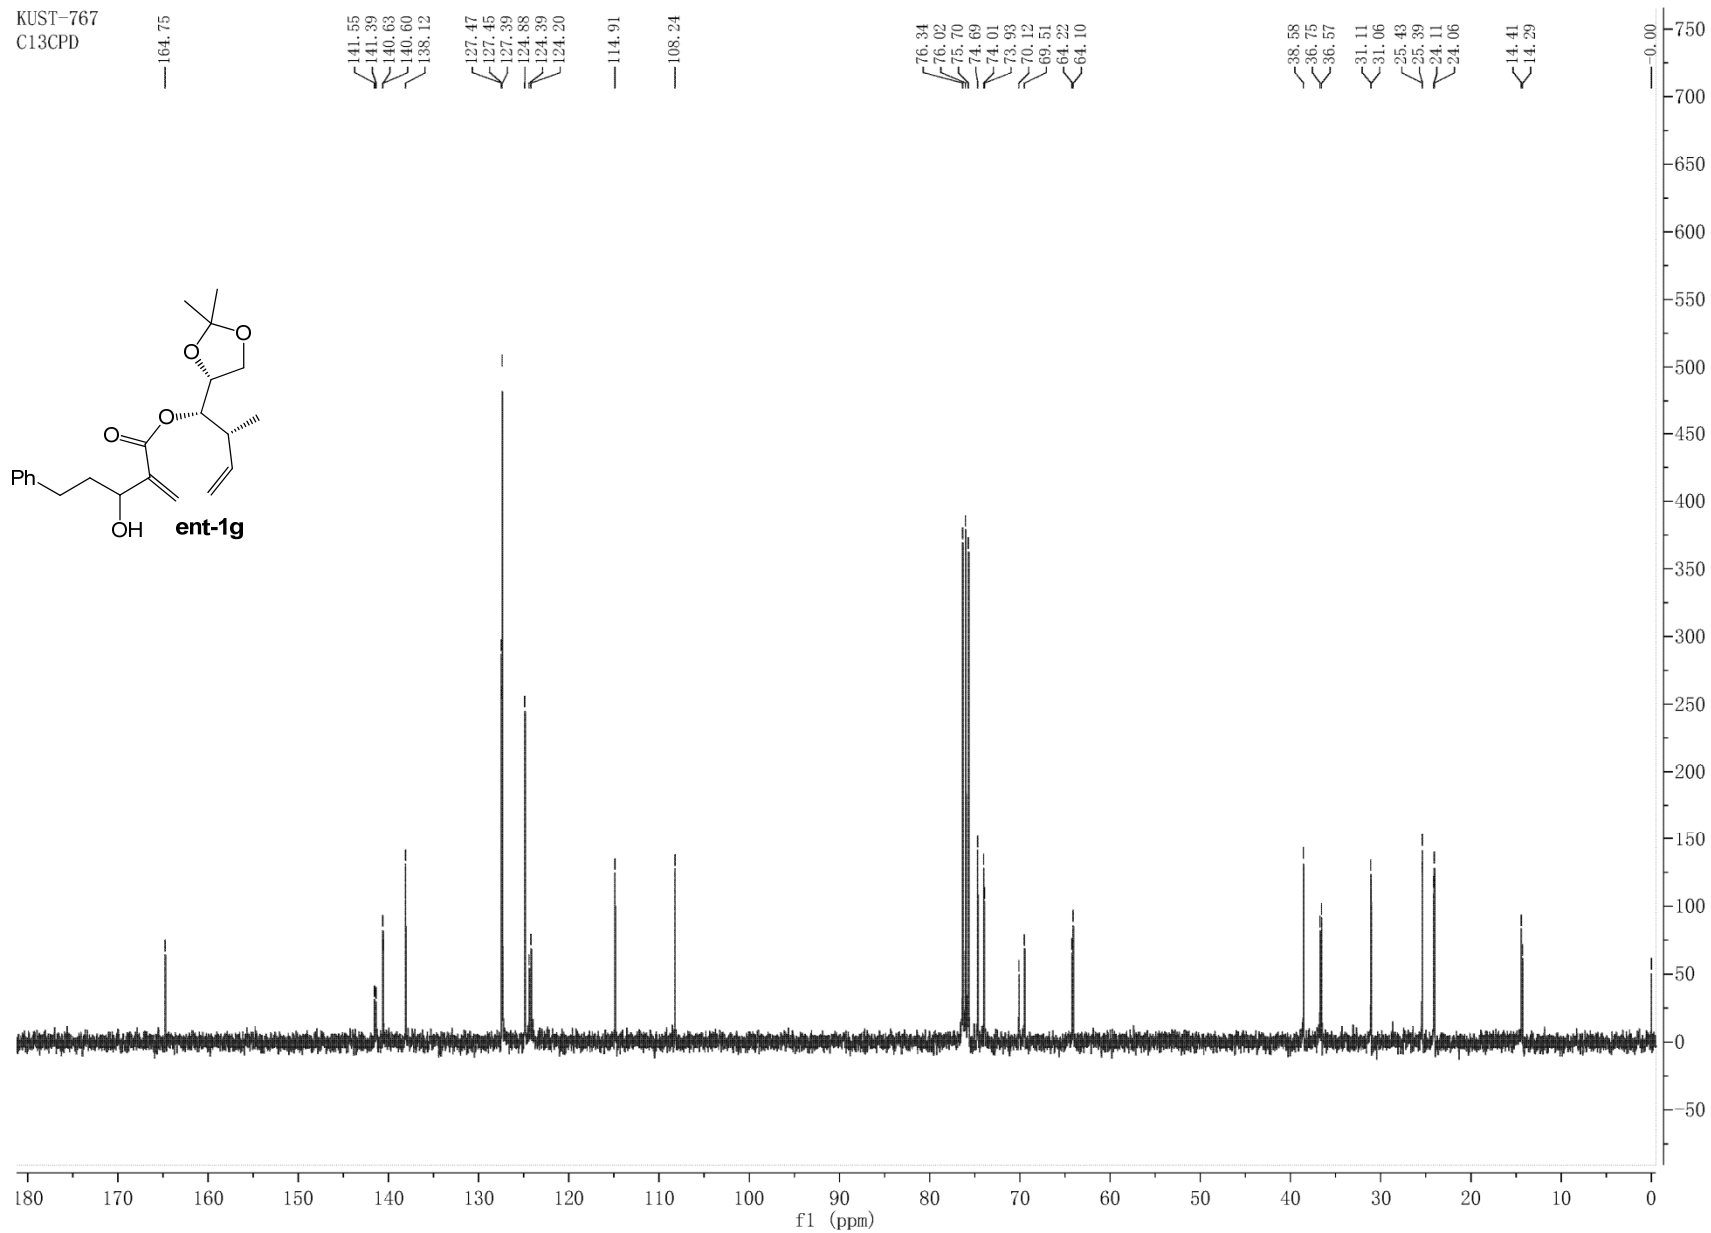

yufuchao140530  
YUNNAN UNIVERSITY AV. DRX 500  
yufuchao KuST794 in CDC13  
14052812

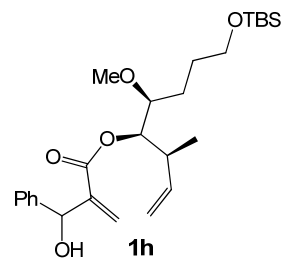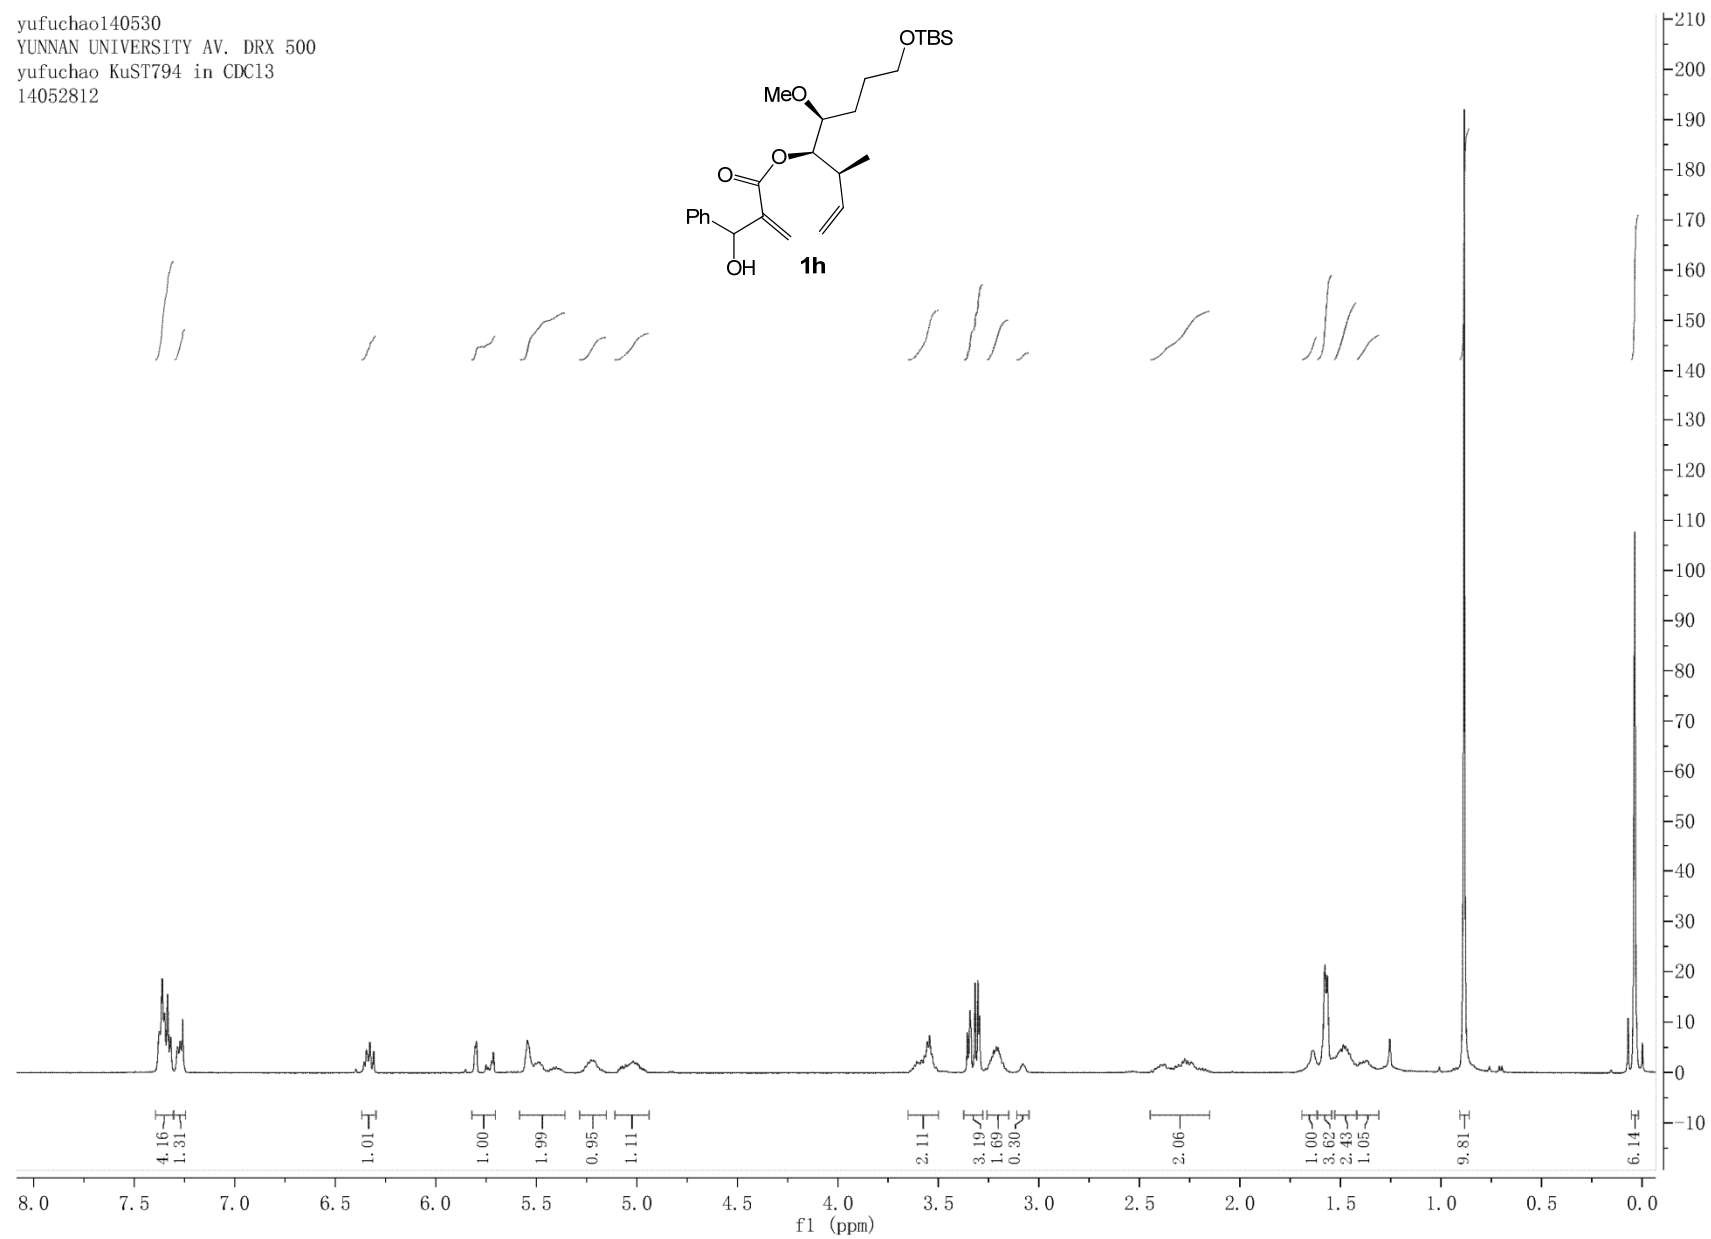

yufuchao140539  
YUNNAN UNIVERSITY AV. DRX 500  
yufuchao KuST794 in CDC13  
14052812

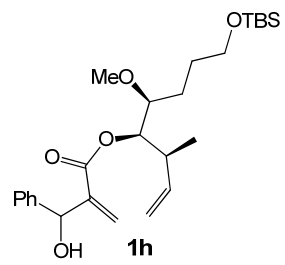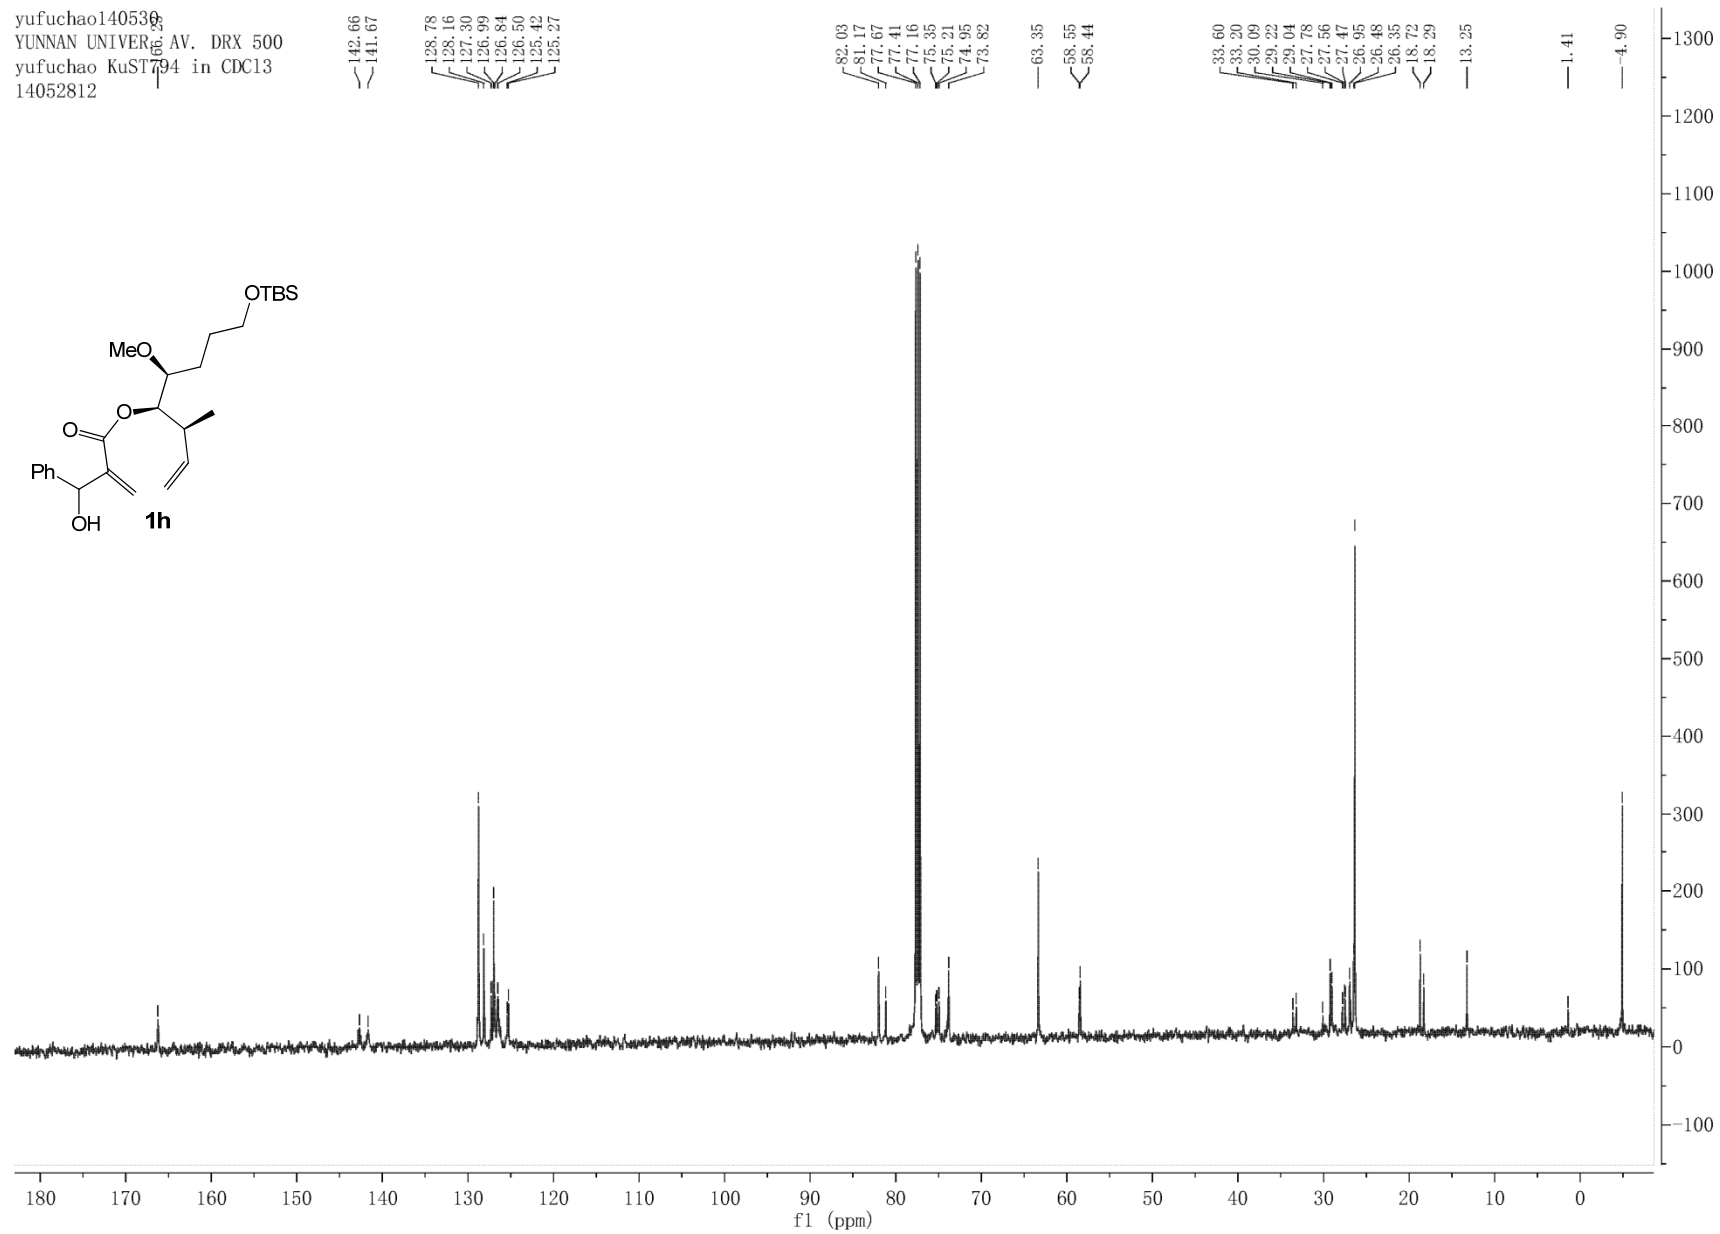

YUFUCHAO140523NMR  
YUNNAN UNIVERSITY AV. DRX 500  
yufuchao KuST778 in CDC13  
14052008

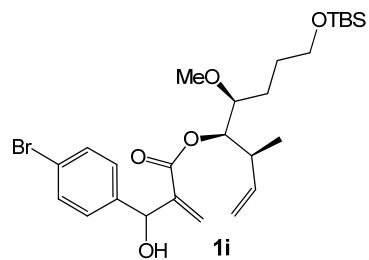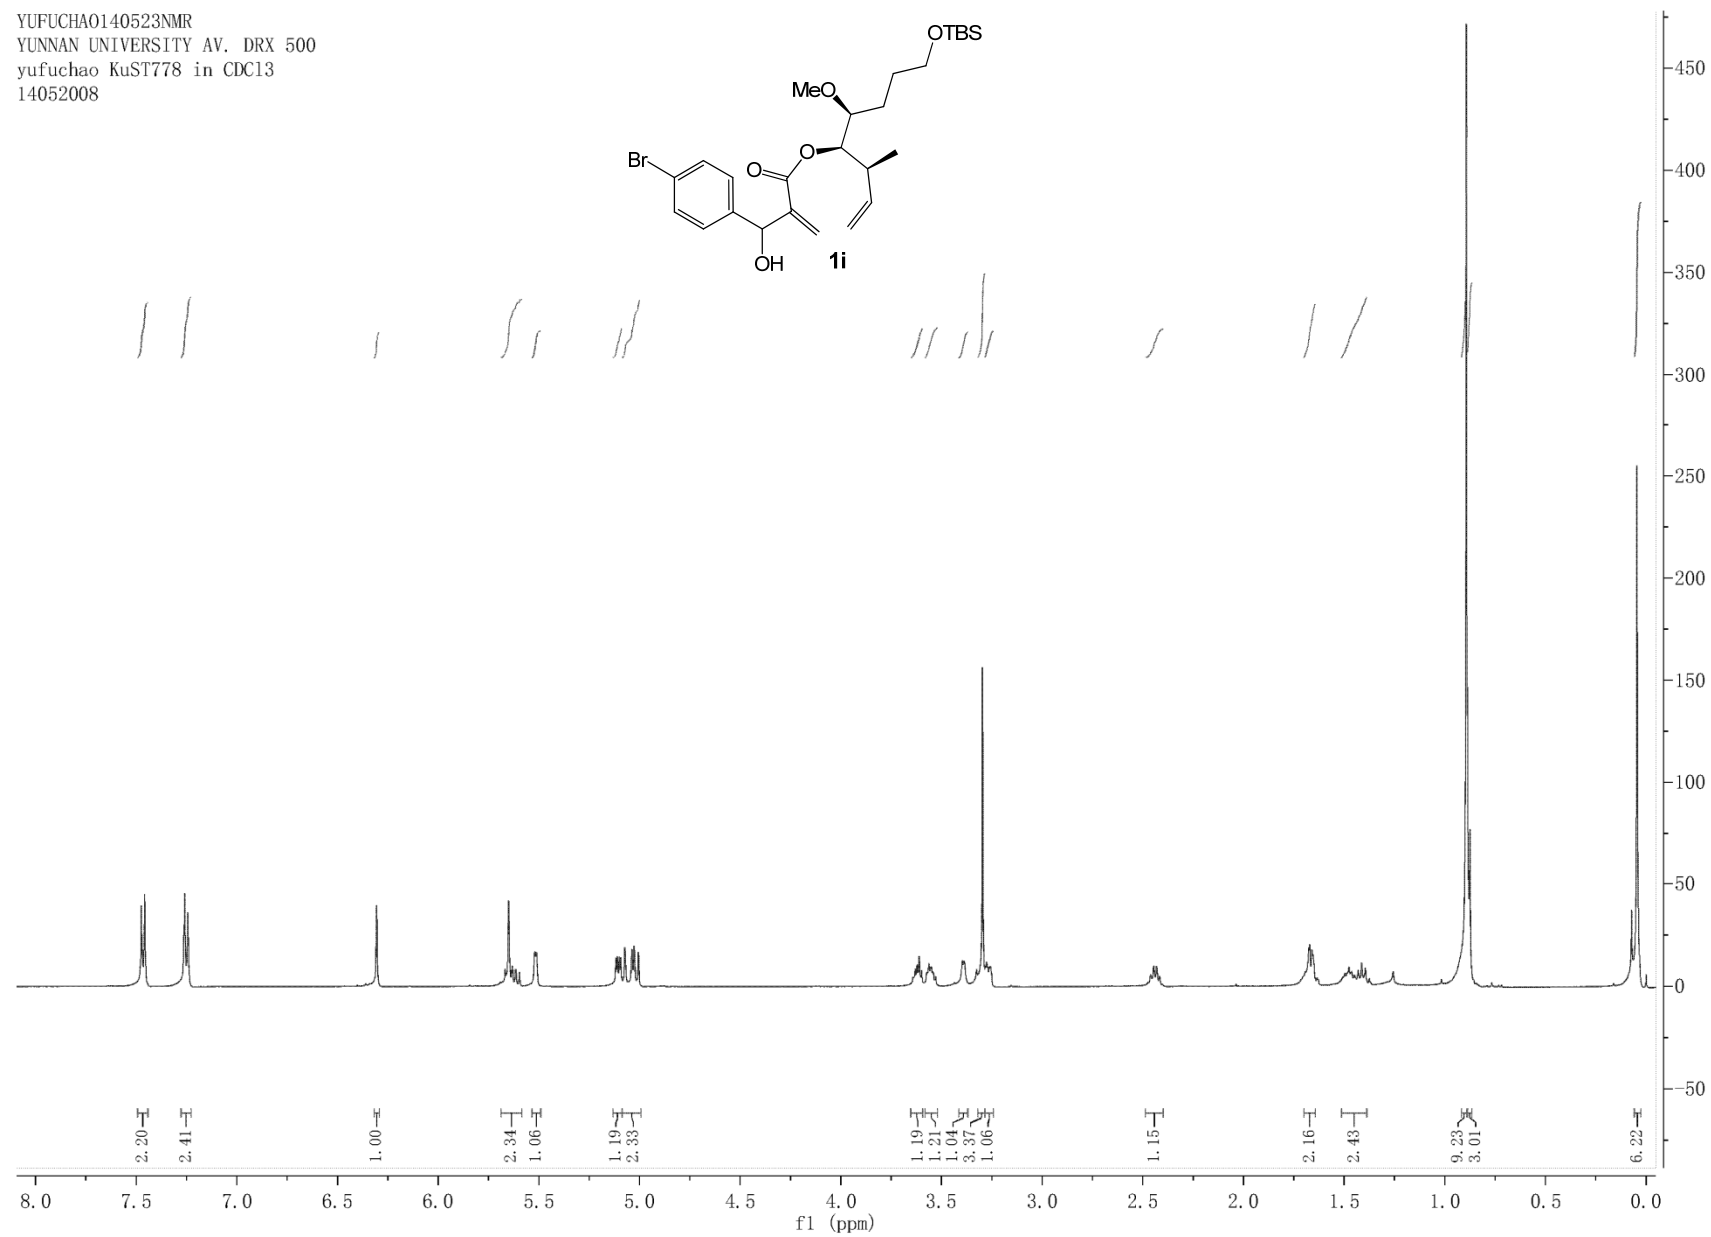

YUFUCHAO140523NMR  
YUNNAN UNIVERSITY AV. DRX 500  
yufuchao KuSI778 in CDC13  
14052008

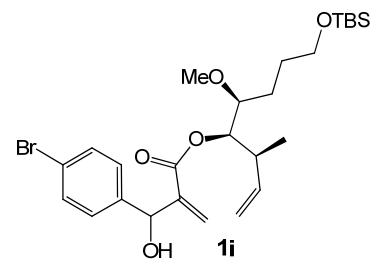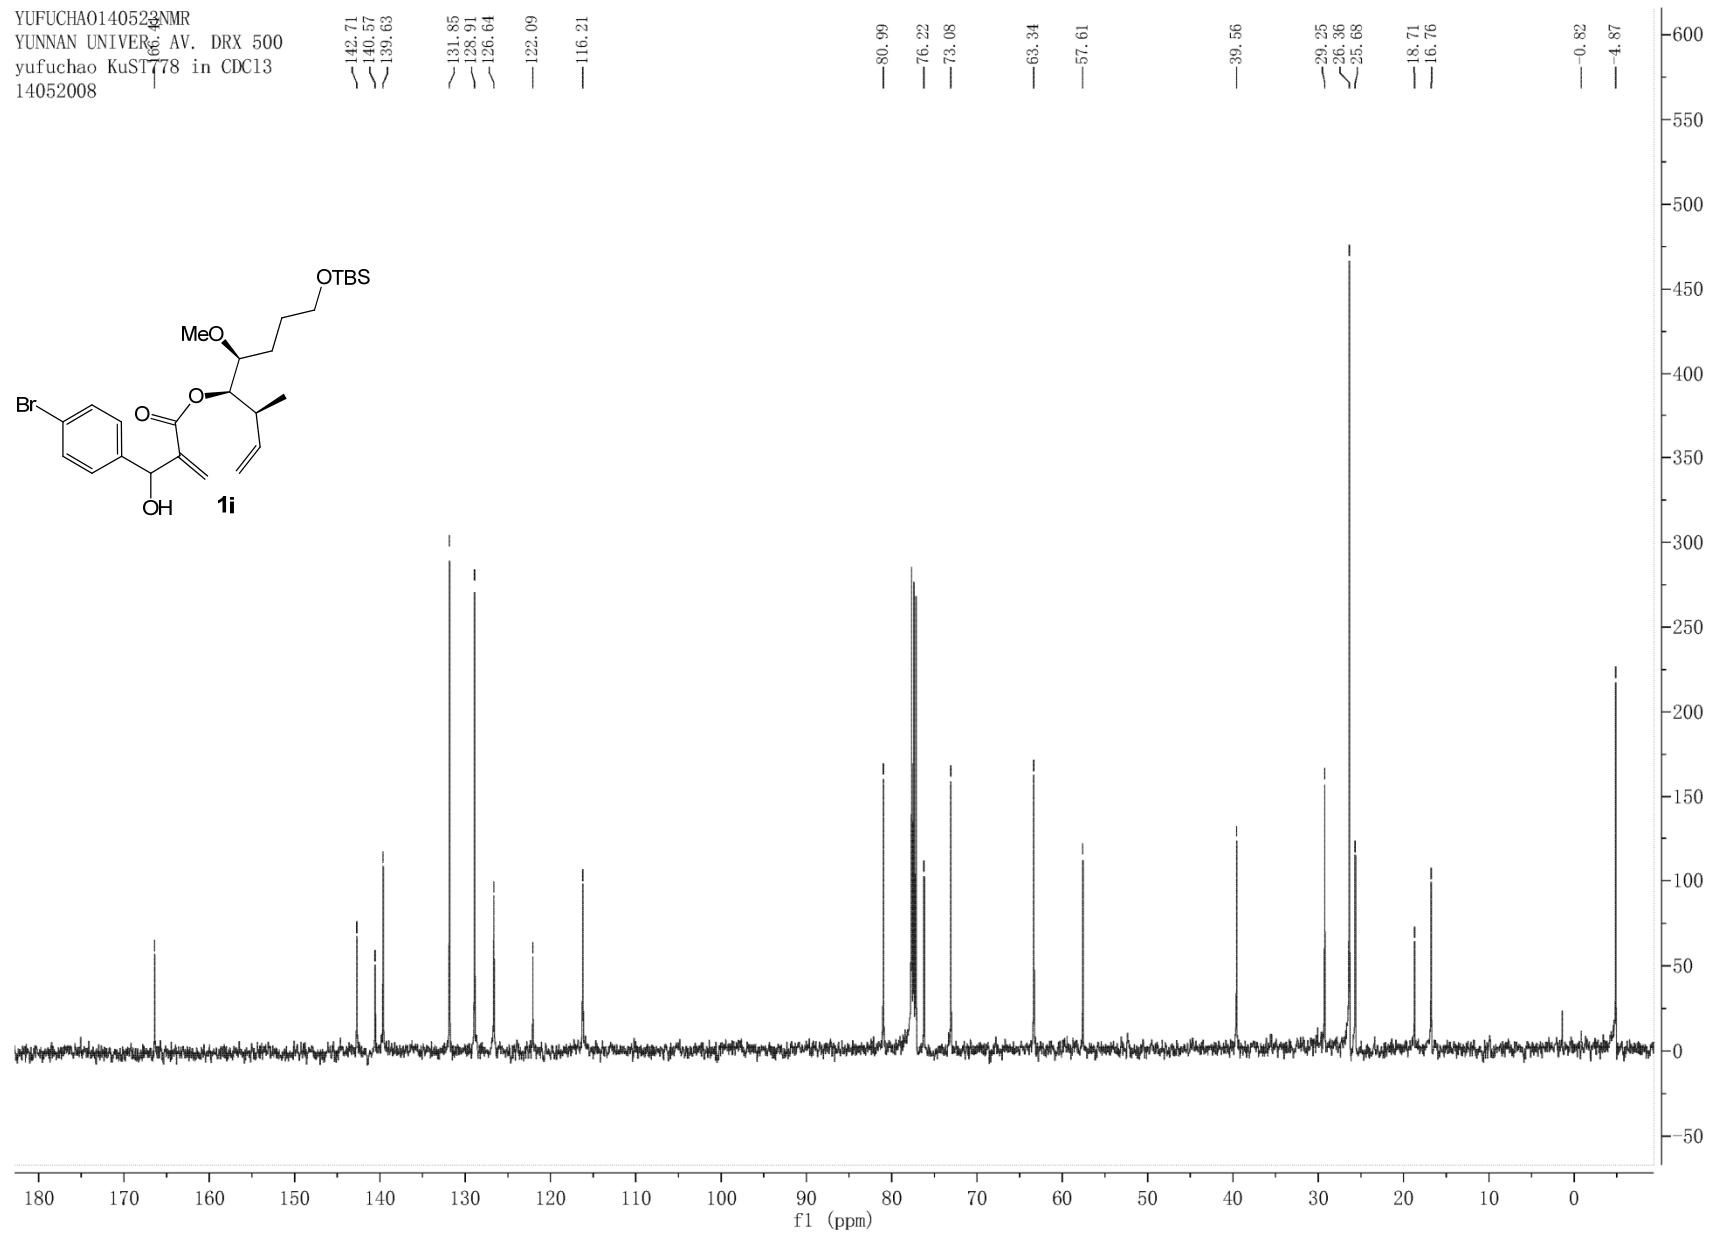

KUST-674  
PROTON

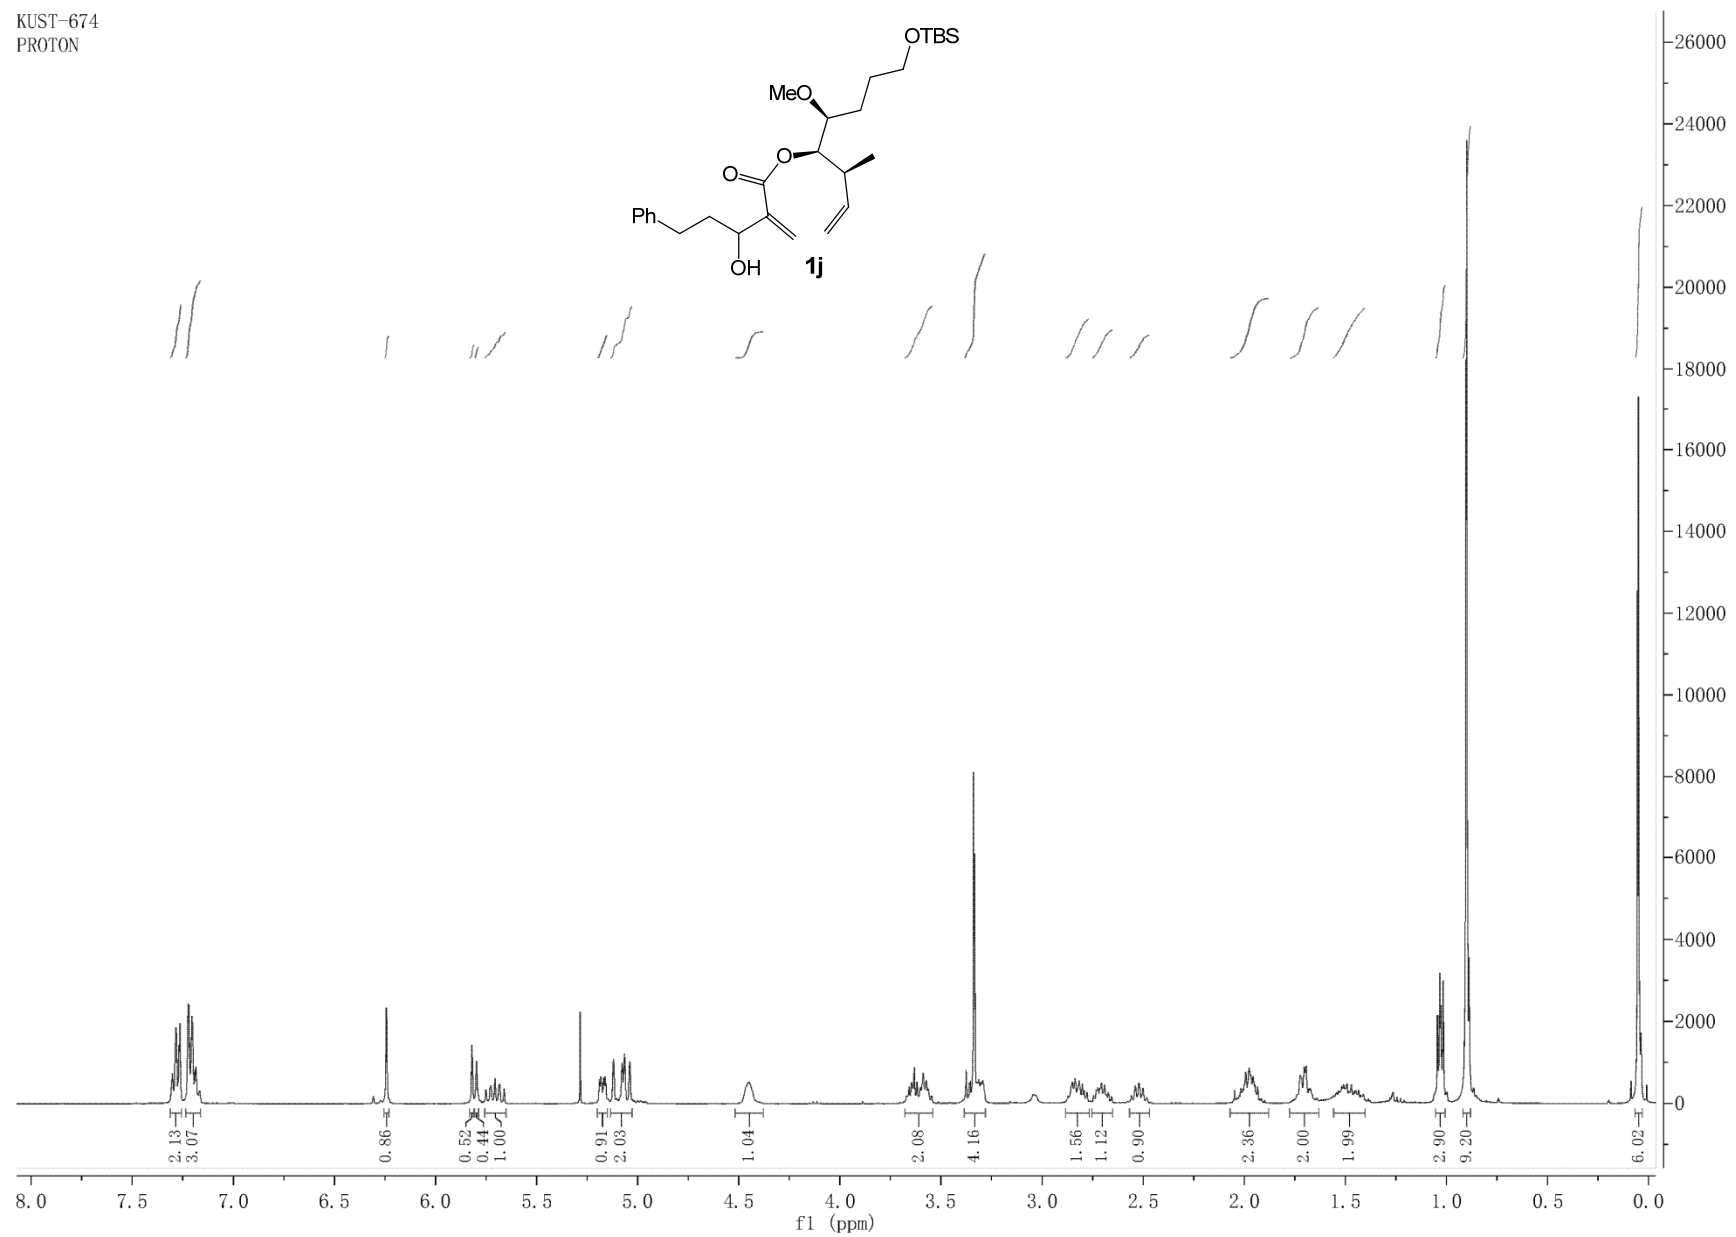

KUST-674  
C13CPD

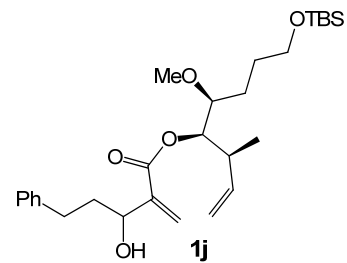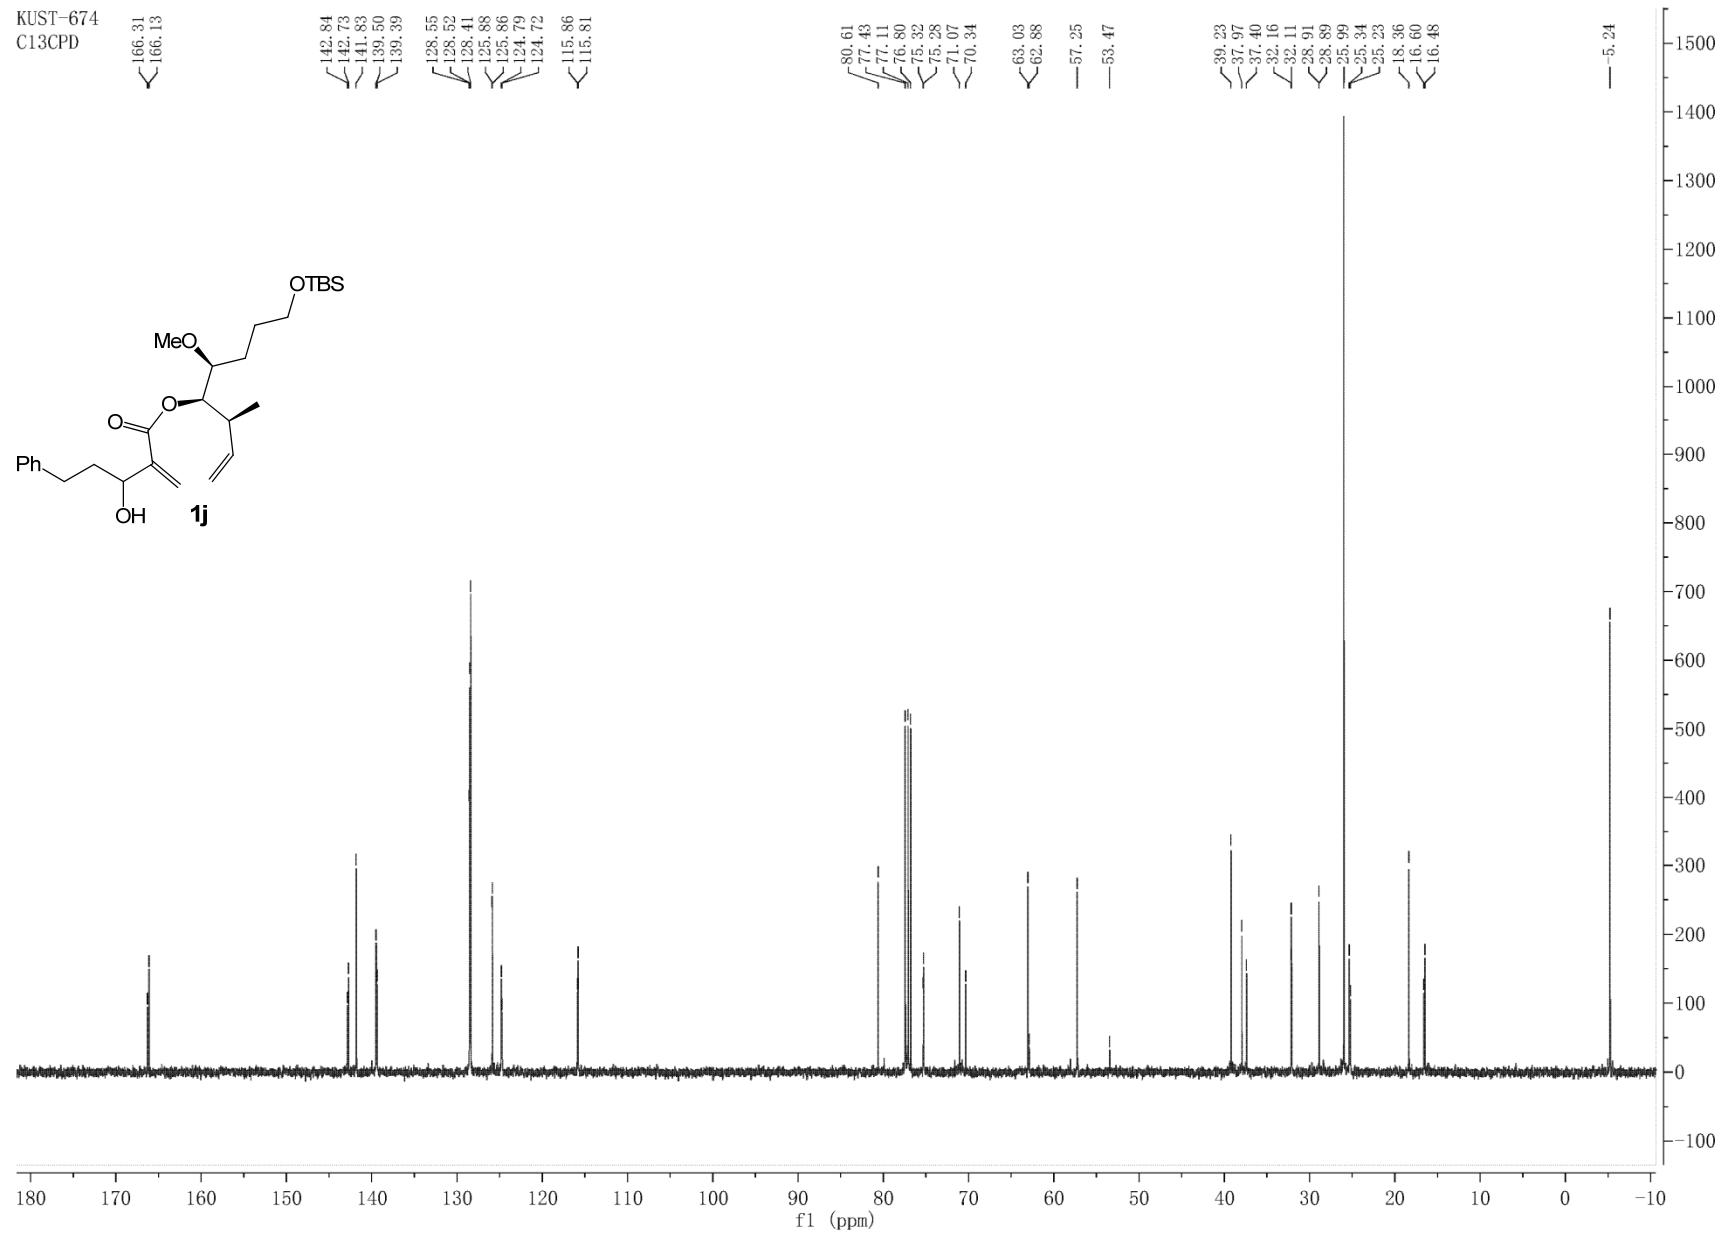

YUFUCHAO140523NMR  
YUNNAN UNIVERSITY AV. DRX 500  
yufuchao KuST779 in CDCl3  
14052009

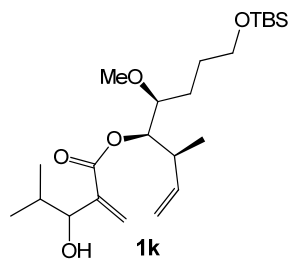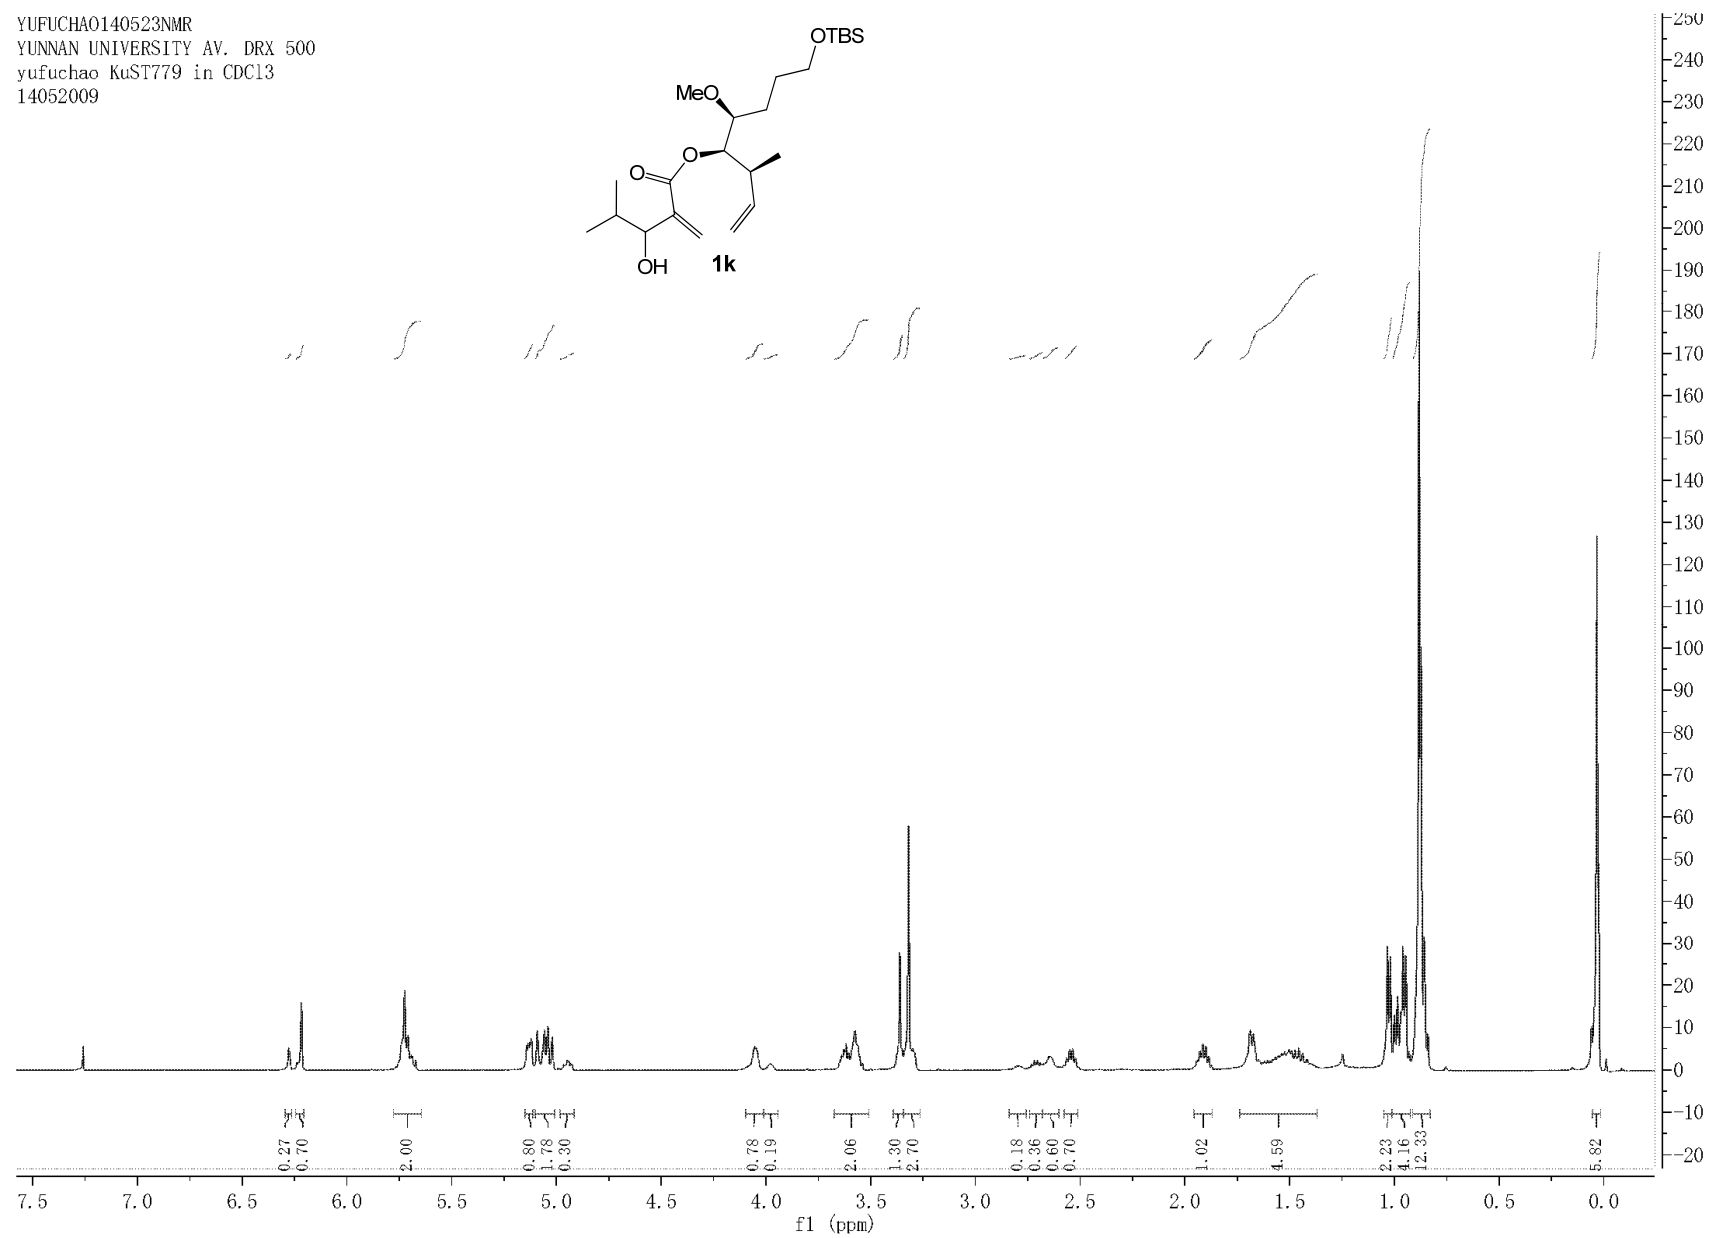





sx-61-a  
sx-61-a  
PROTON CDC13 D:\ XCF 16

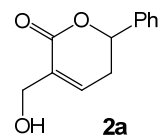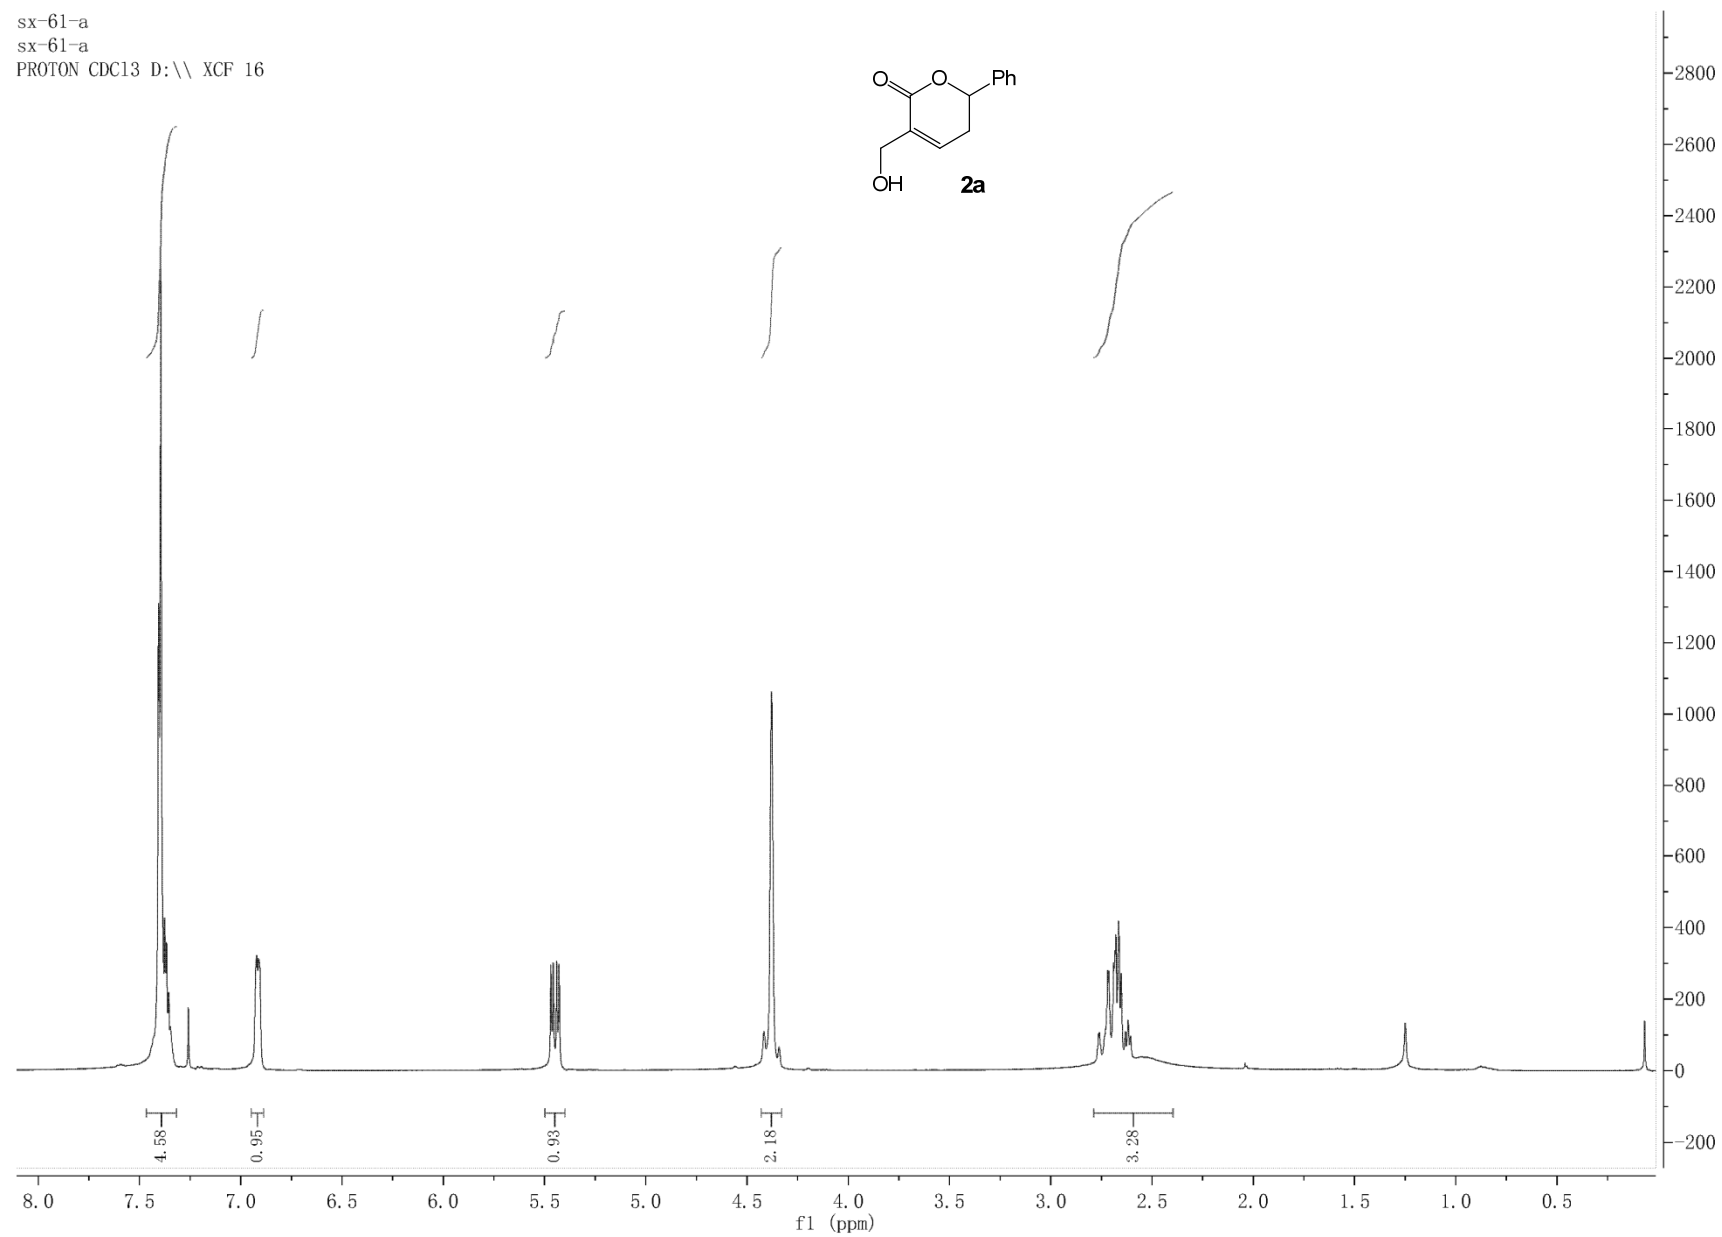

sx-61-a  
sx-61-a  
C13CPD CDC13 D<sub>2</sub>O XCF 16

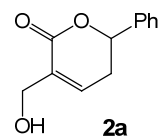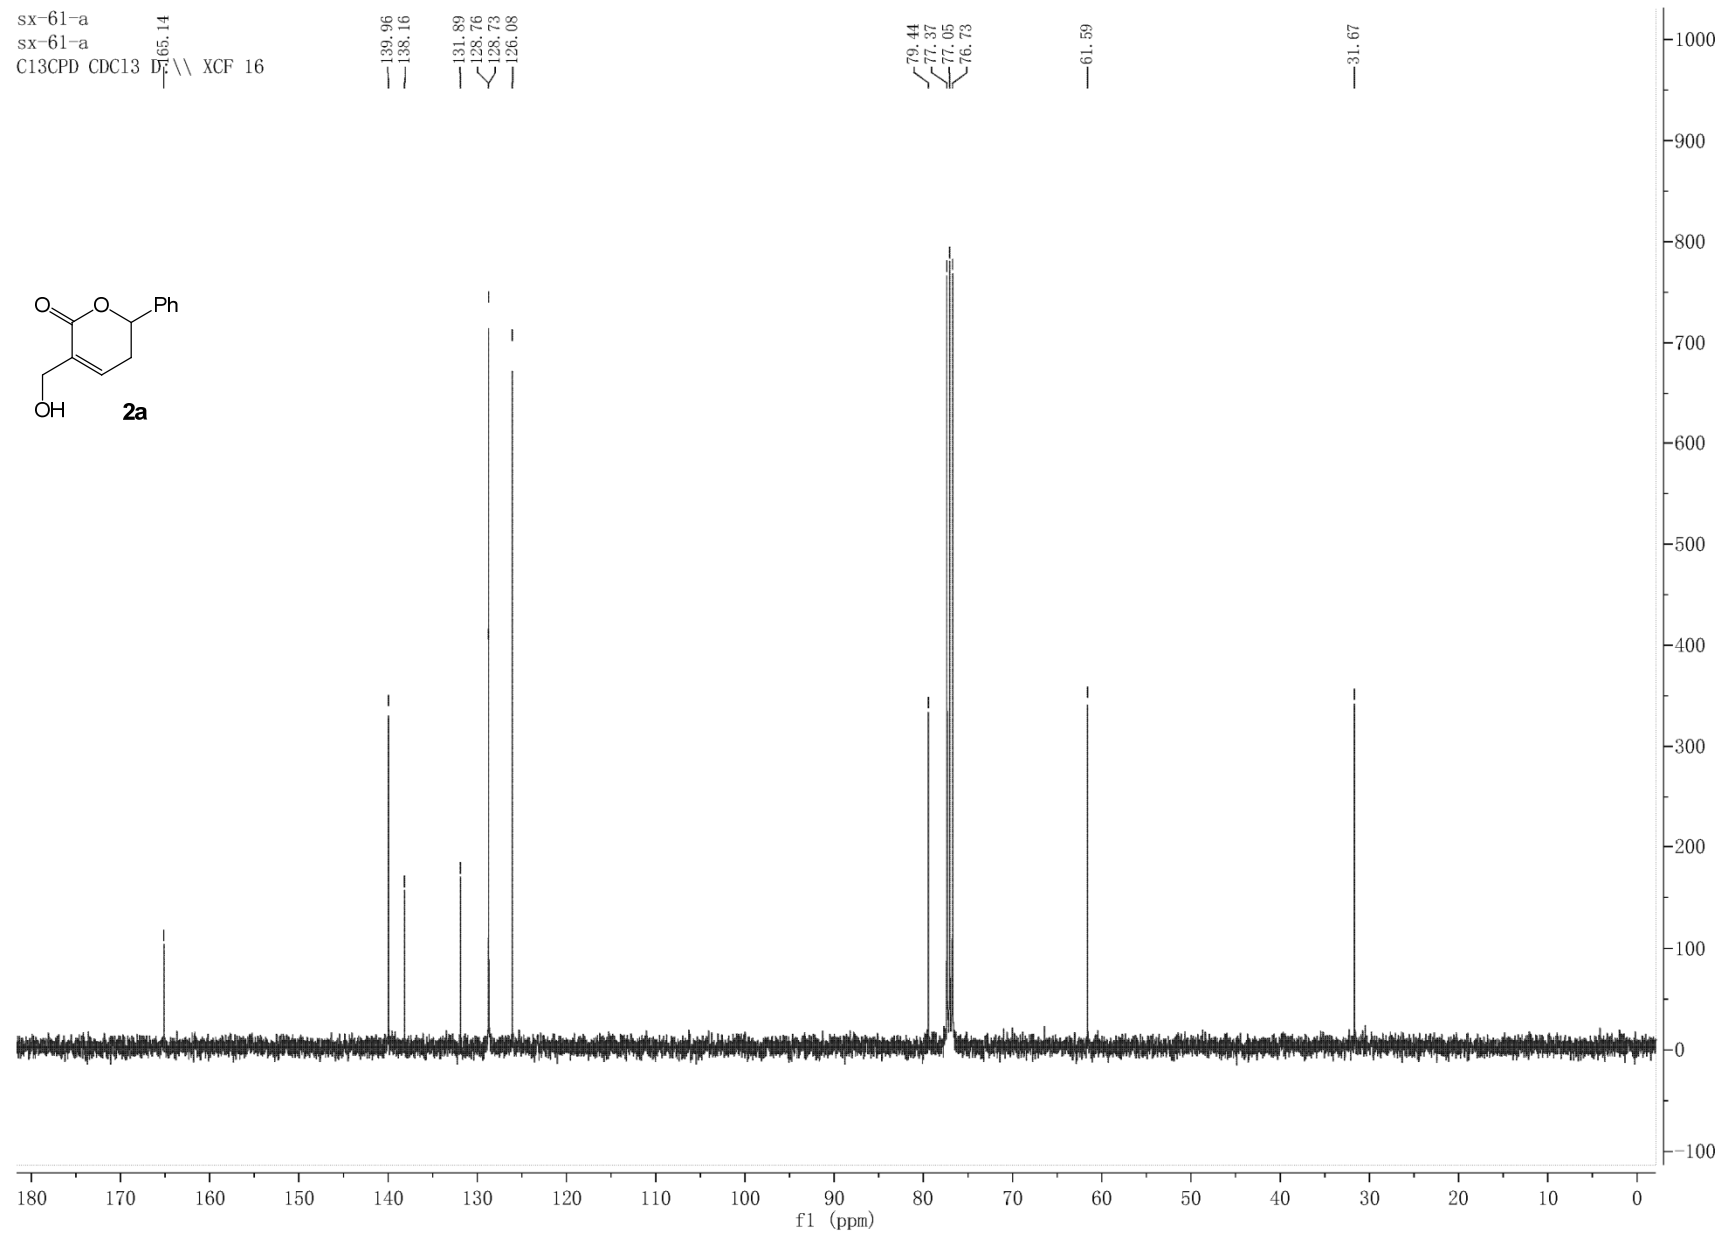

sx-59-b  
sx-59-b  
PROTON CDC13 D:\ XCF 18

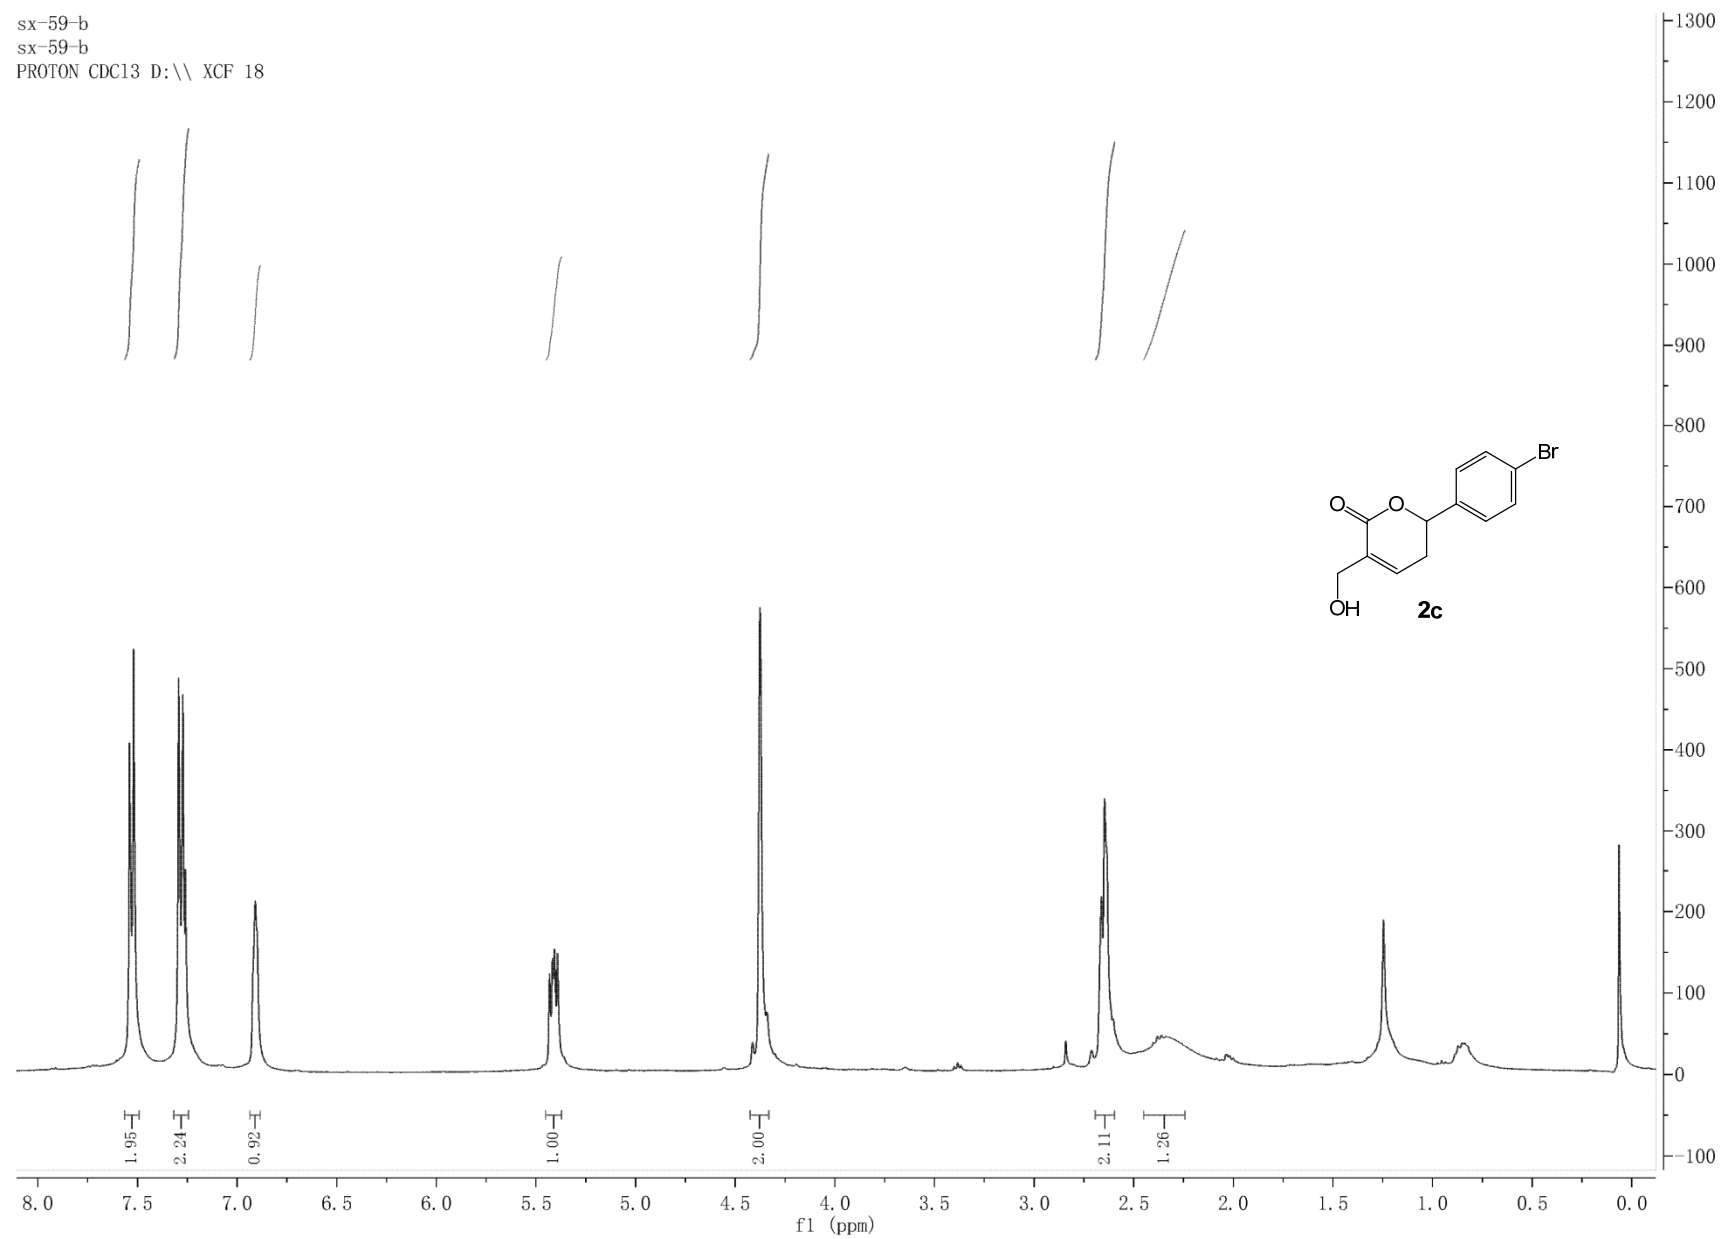

sx-59-b  
sx-59-b  
C13CPD CDC13 D: 164.79 XCF 18

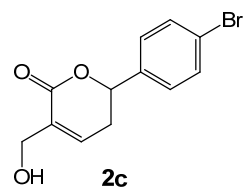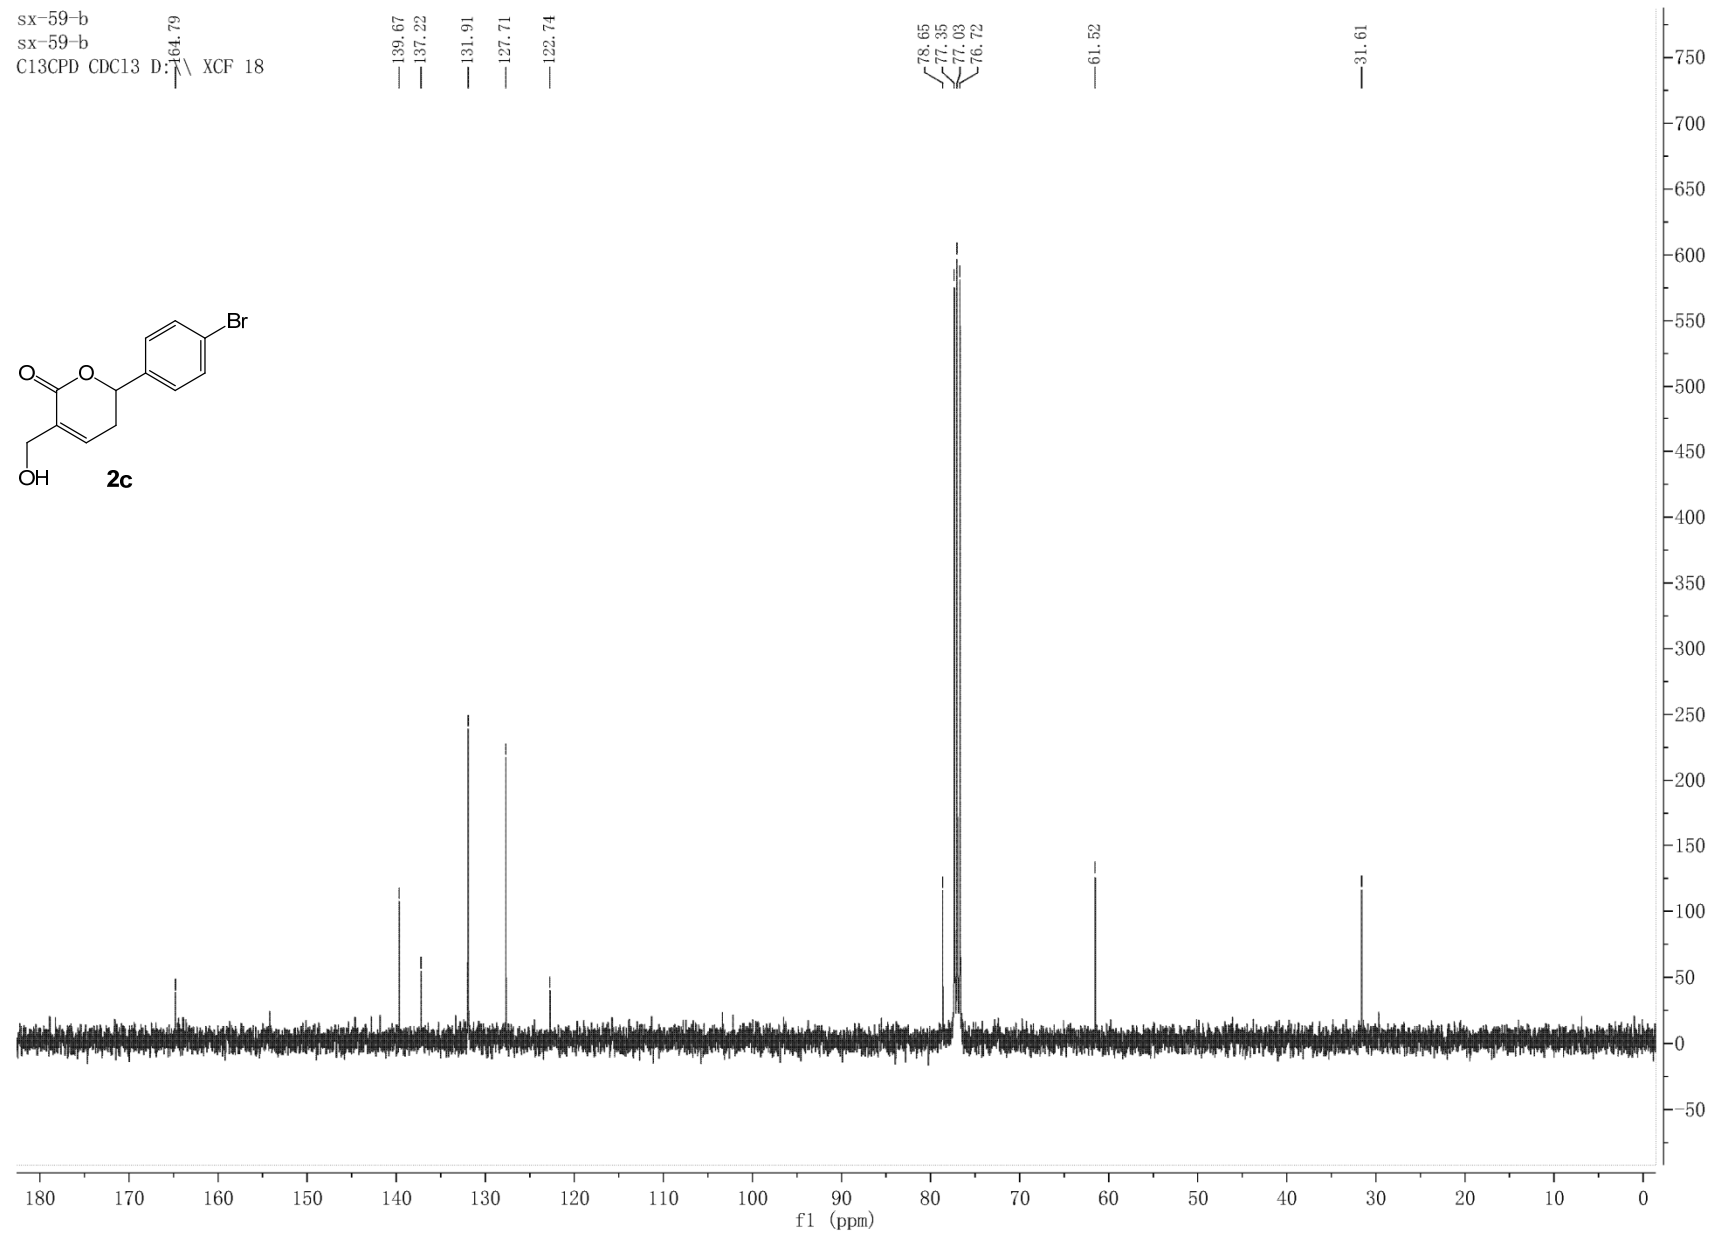

sx-56-a  
sx-56-a  
PROTON CDC13 D:\ XCF 19

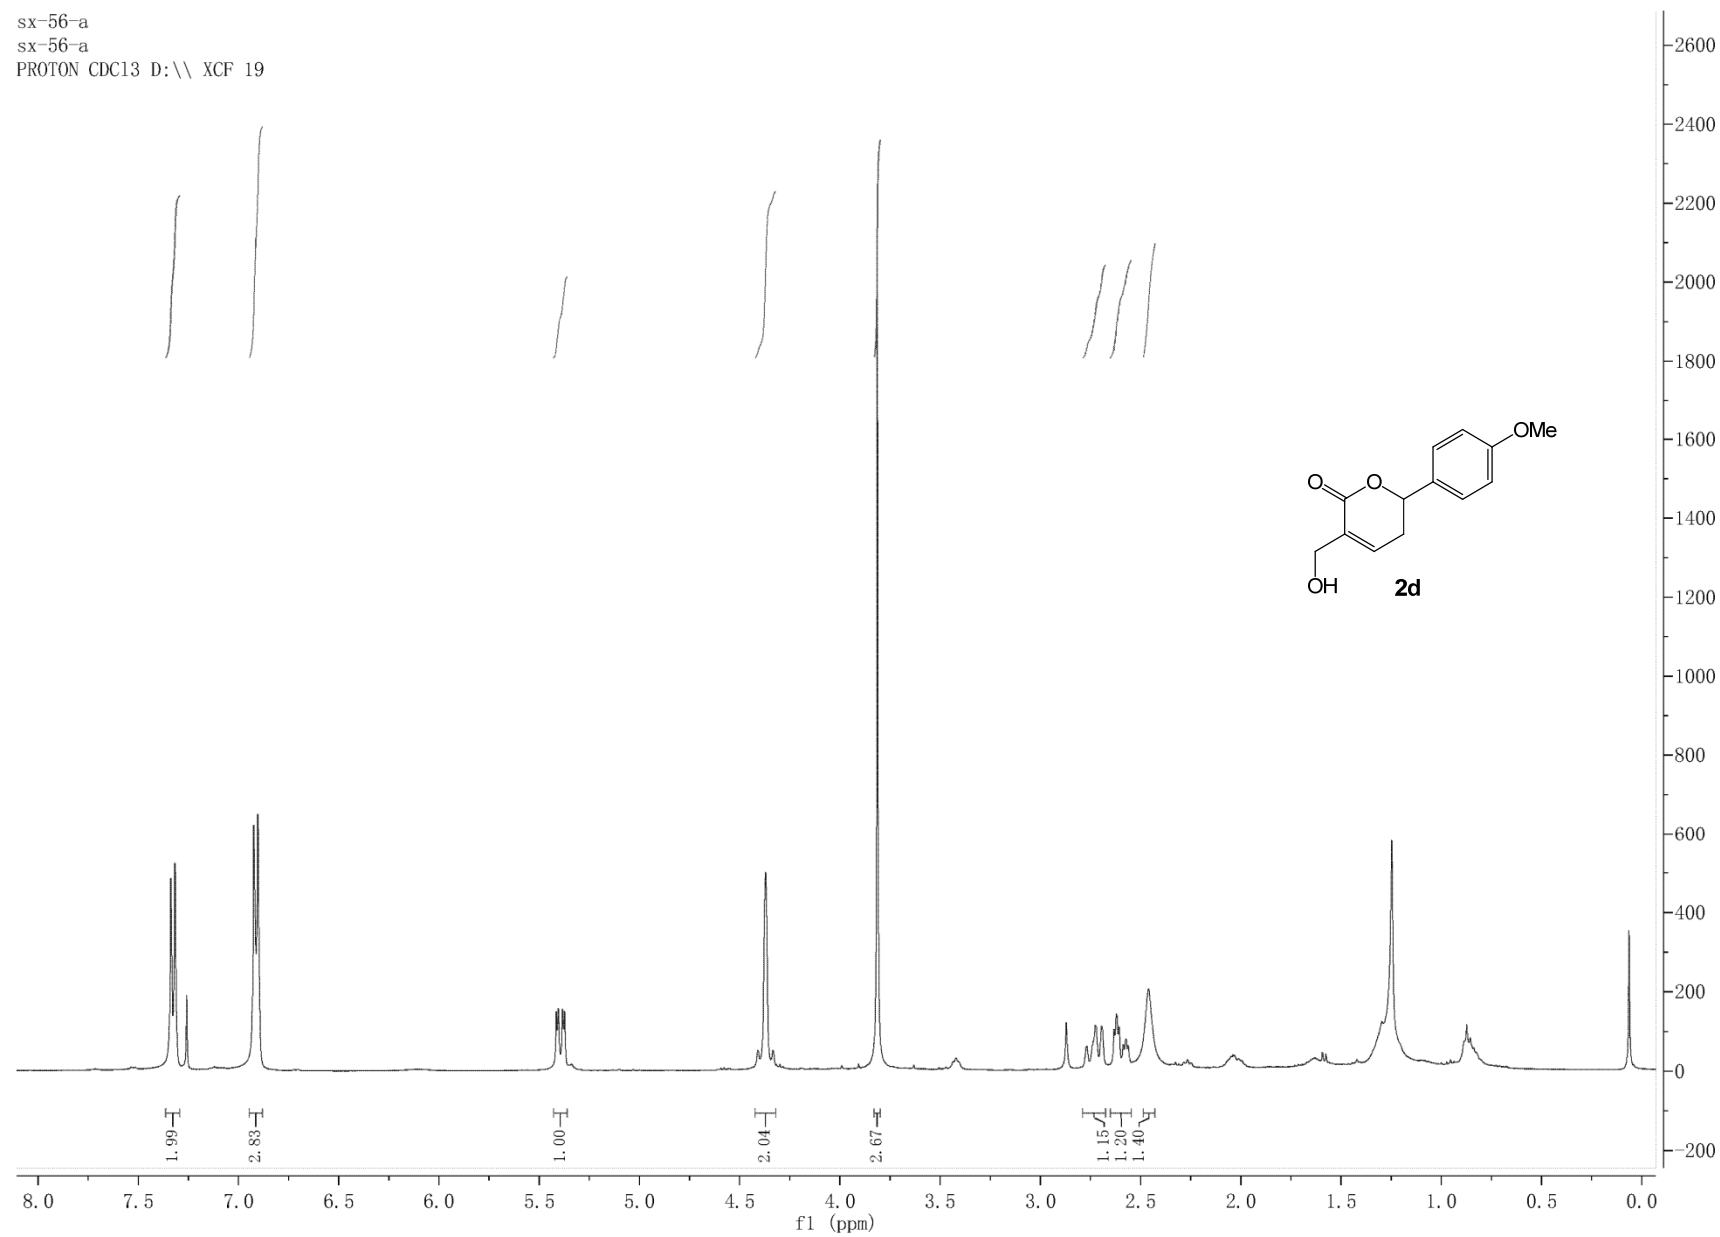

sx-56-a  
sx-56-a  
C13CPD CDC13 165.34  
CF 19 159.92

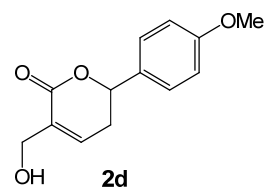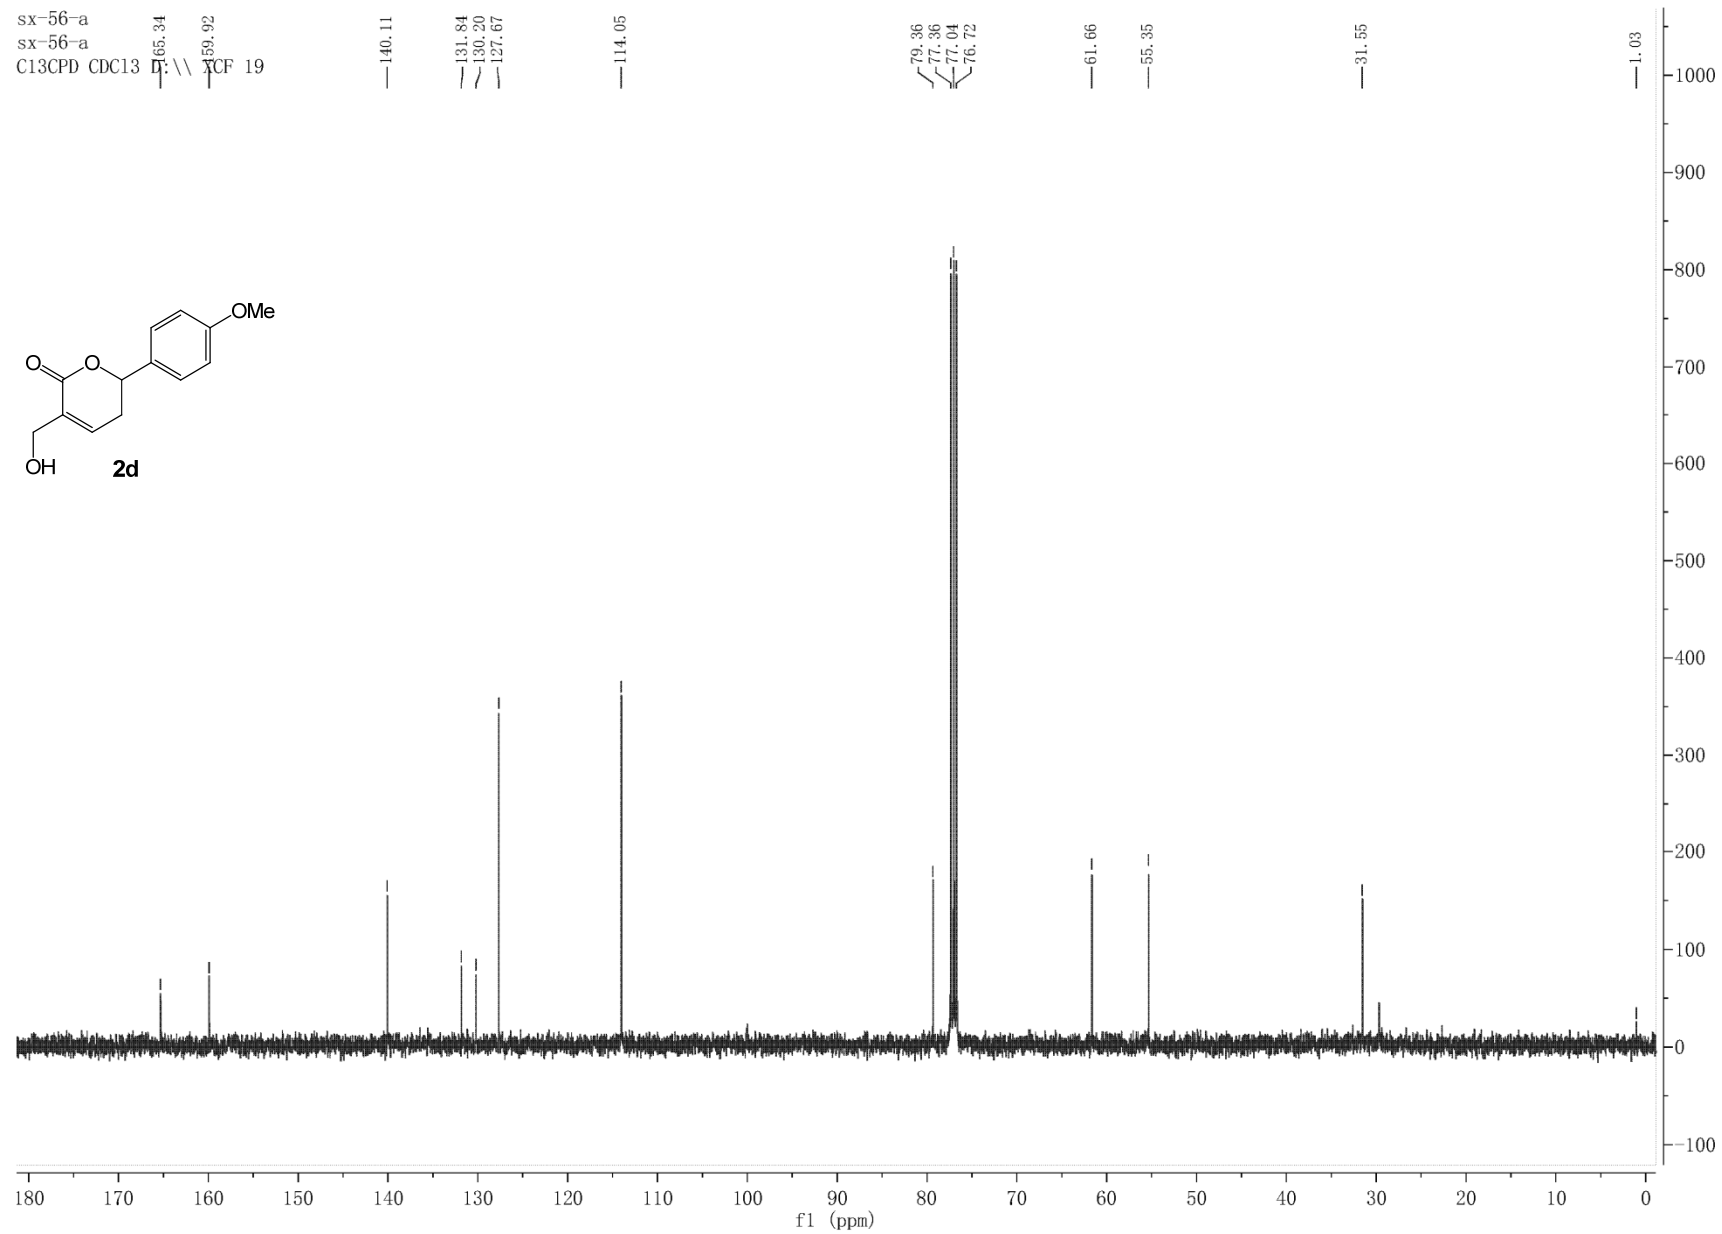

S-53-A  
S-53-A  
PROTON CDC13 D:\ XCF 22

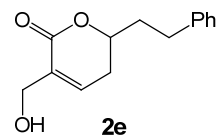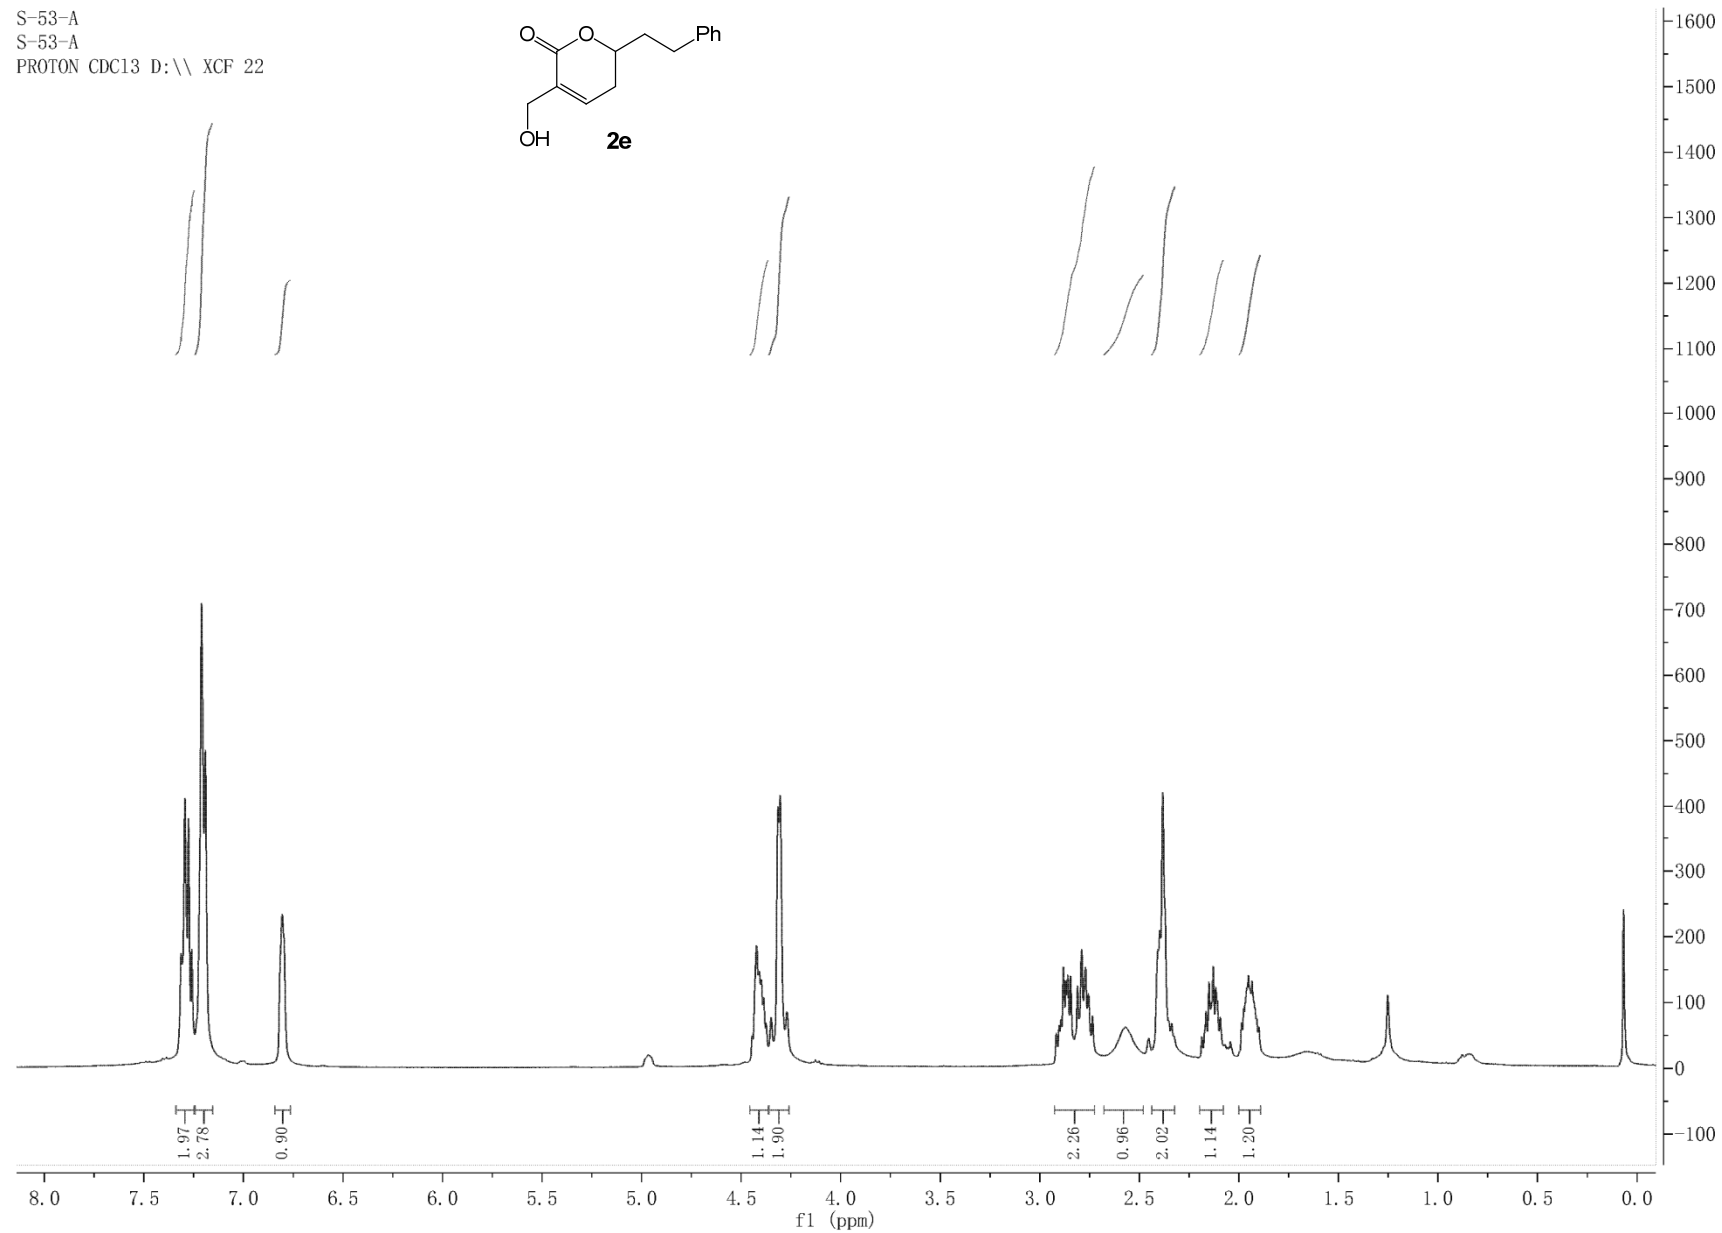



S-53-A  
S-53-A  
C13CPD32 CDC13D:\ XCF 22

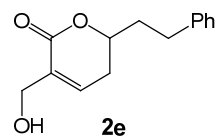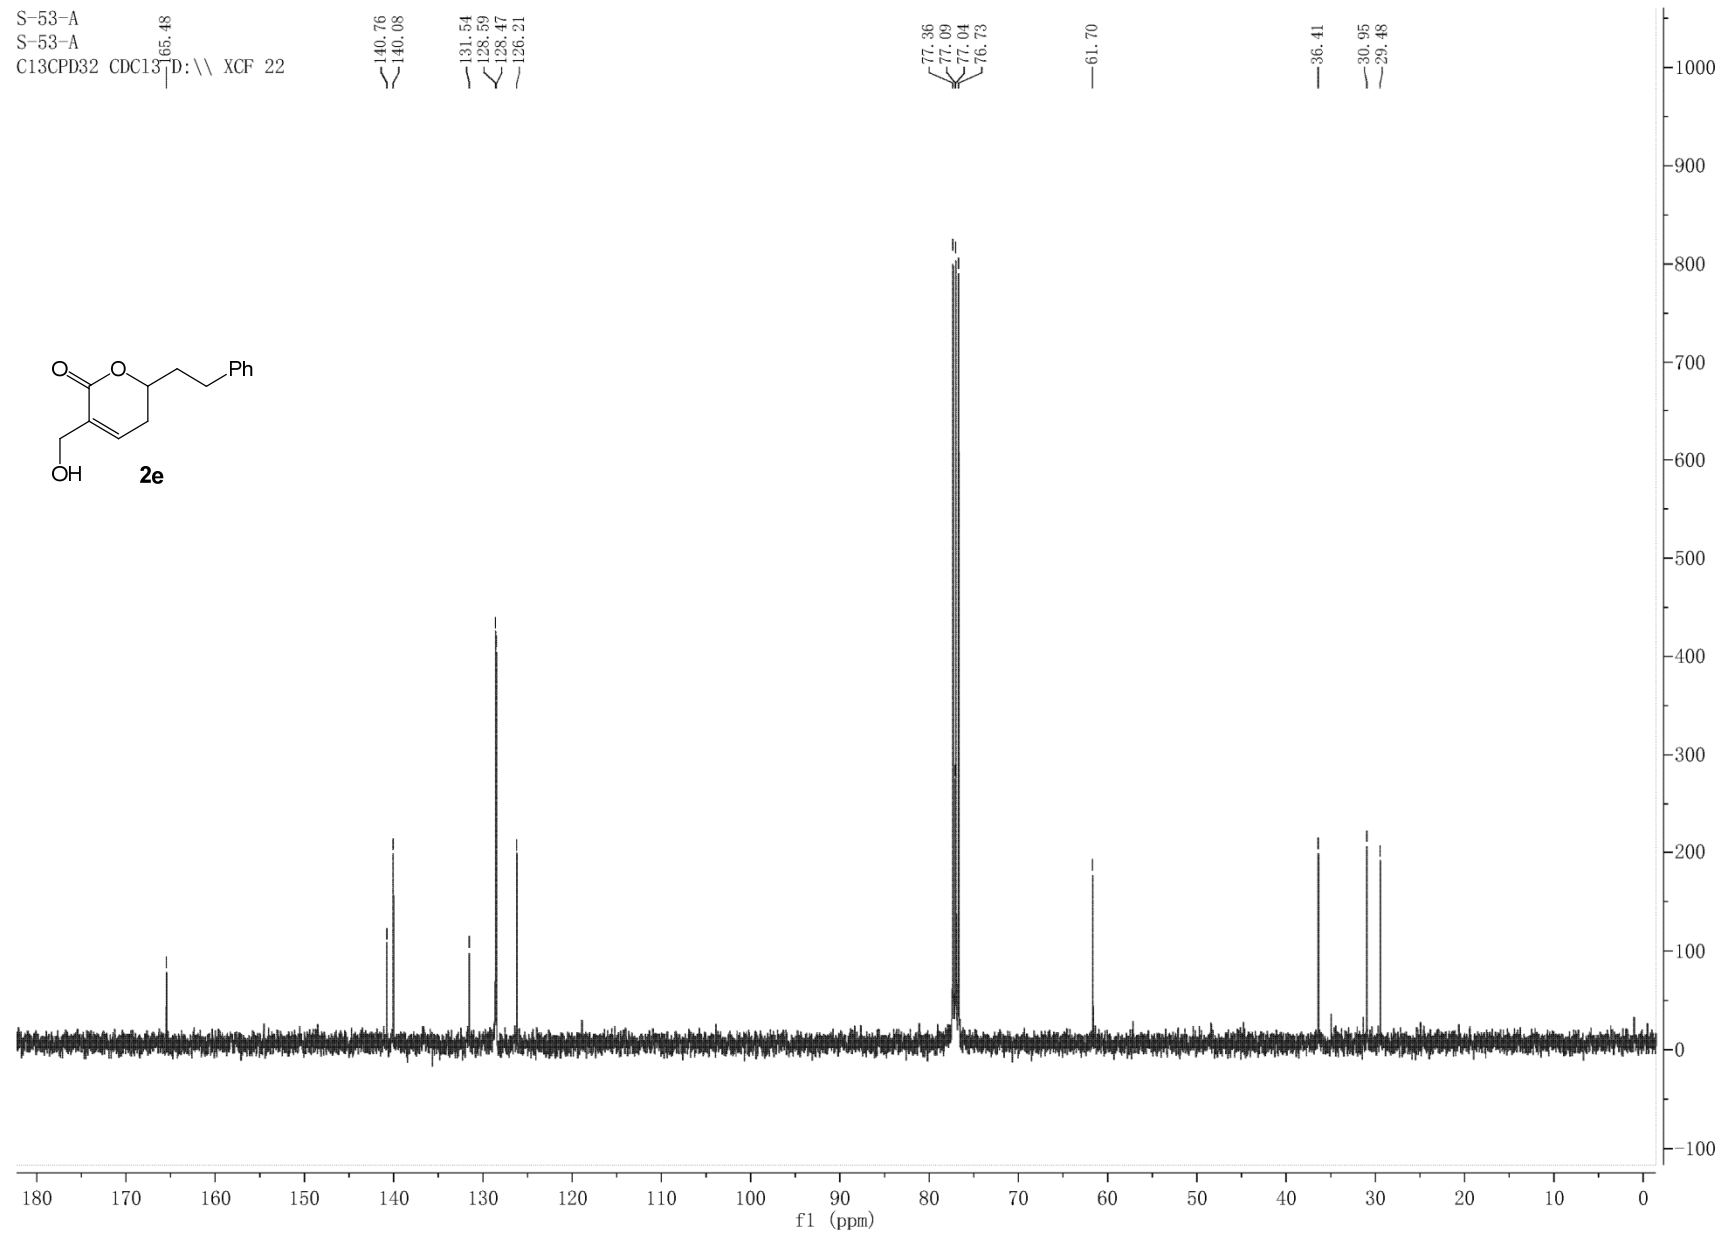

sx-68-b  
sx-68-b  
PROTON CDC13 D:\ XCF 11

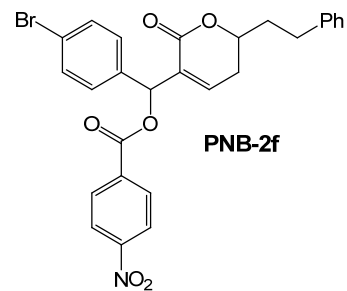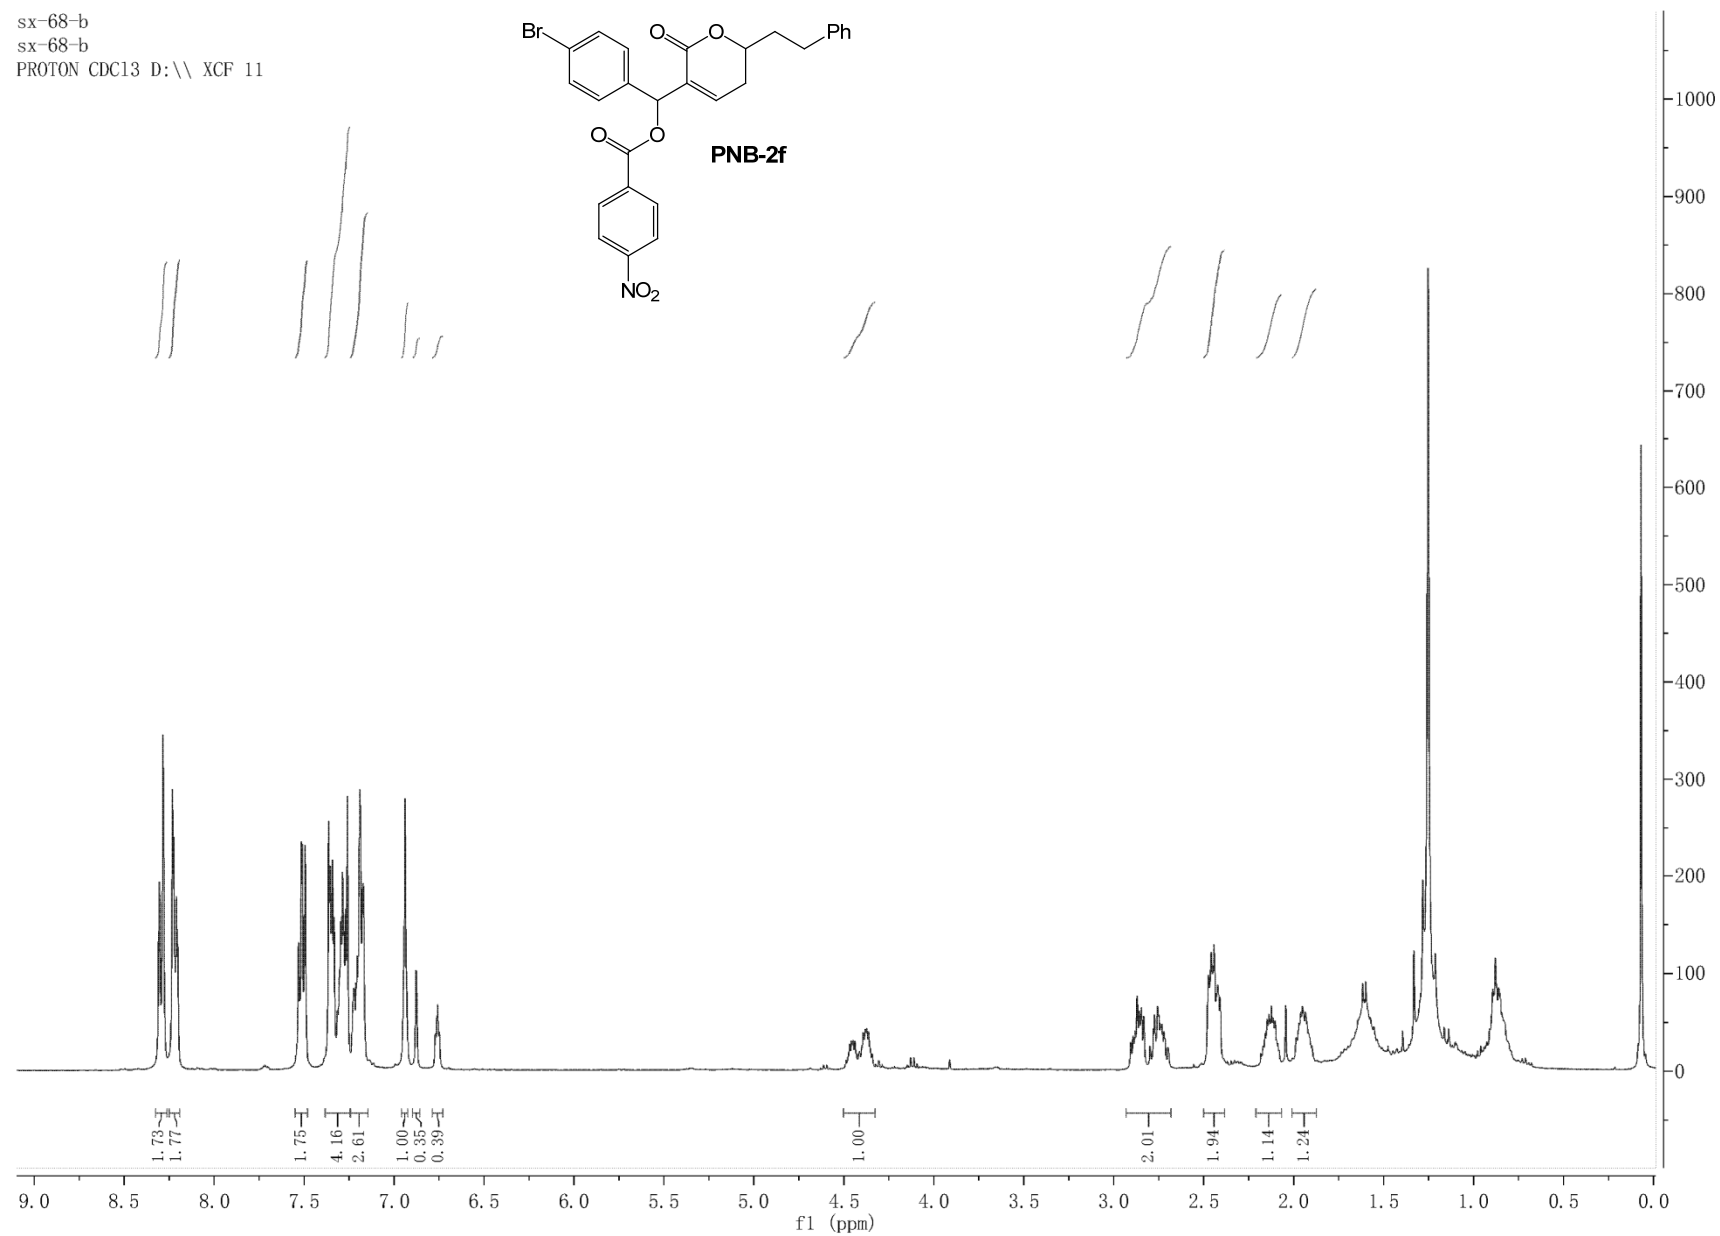

sx-68-b  
sx-68-b  
C13CPD CDC13 D:\ XCF 11

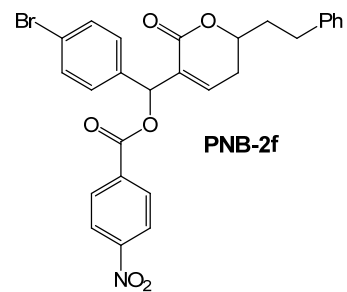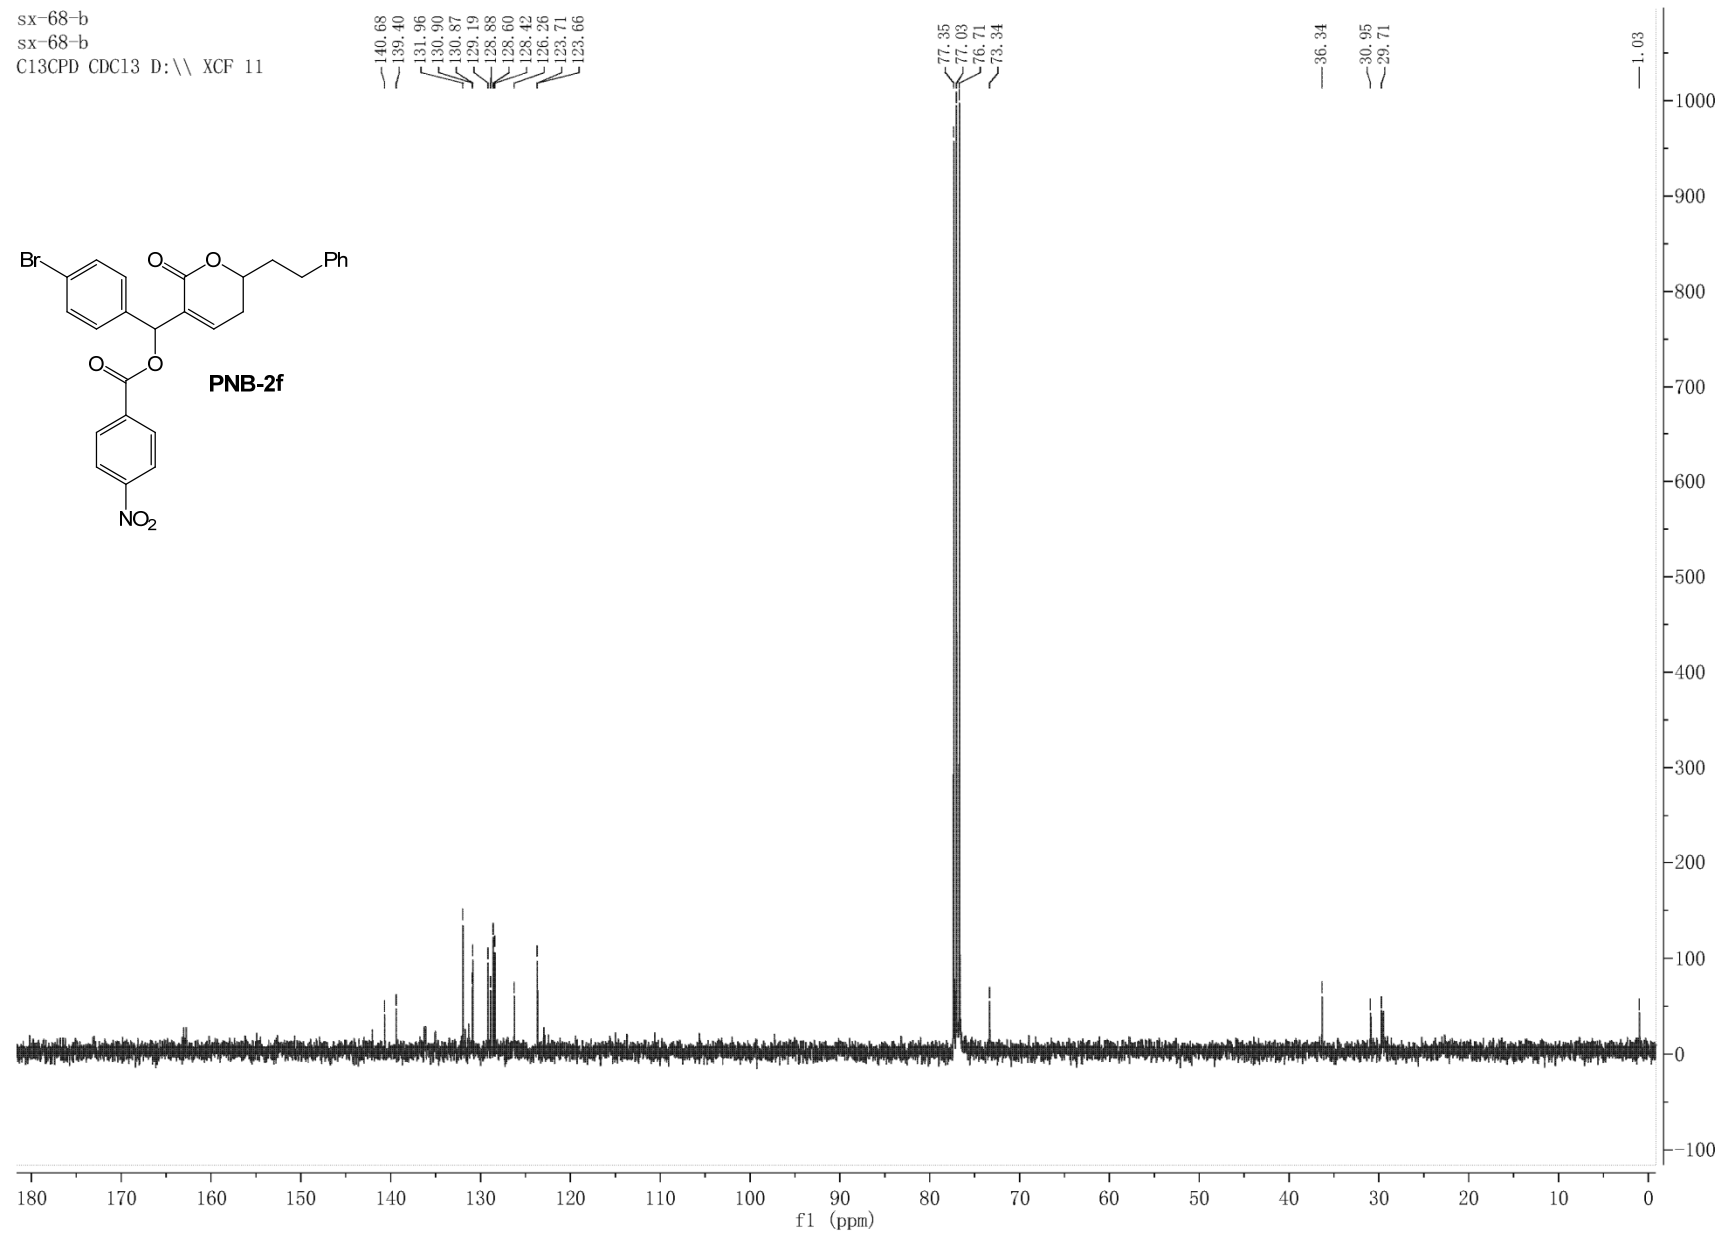

yufuchao131203  
YUNNAN UNIVER. AV. DRX 500  
K001 in CDC13  
13120301

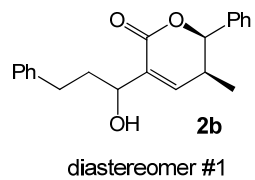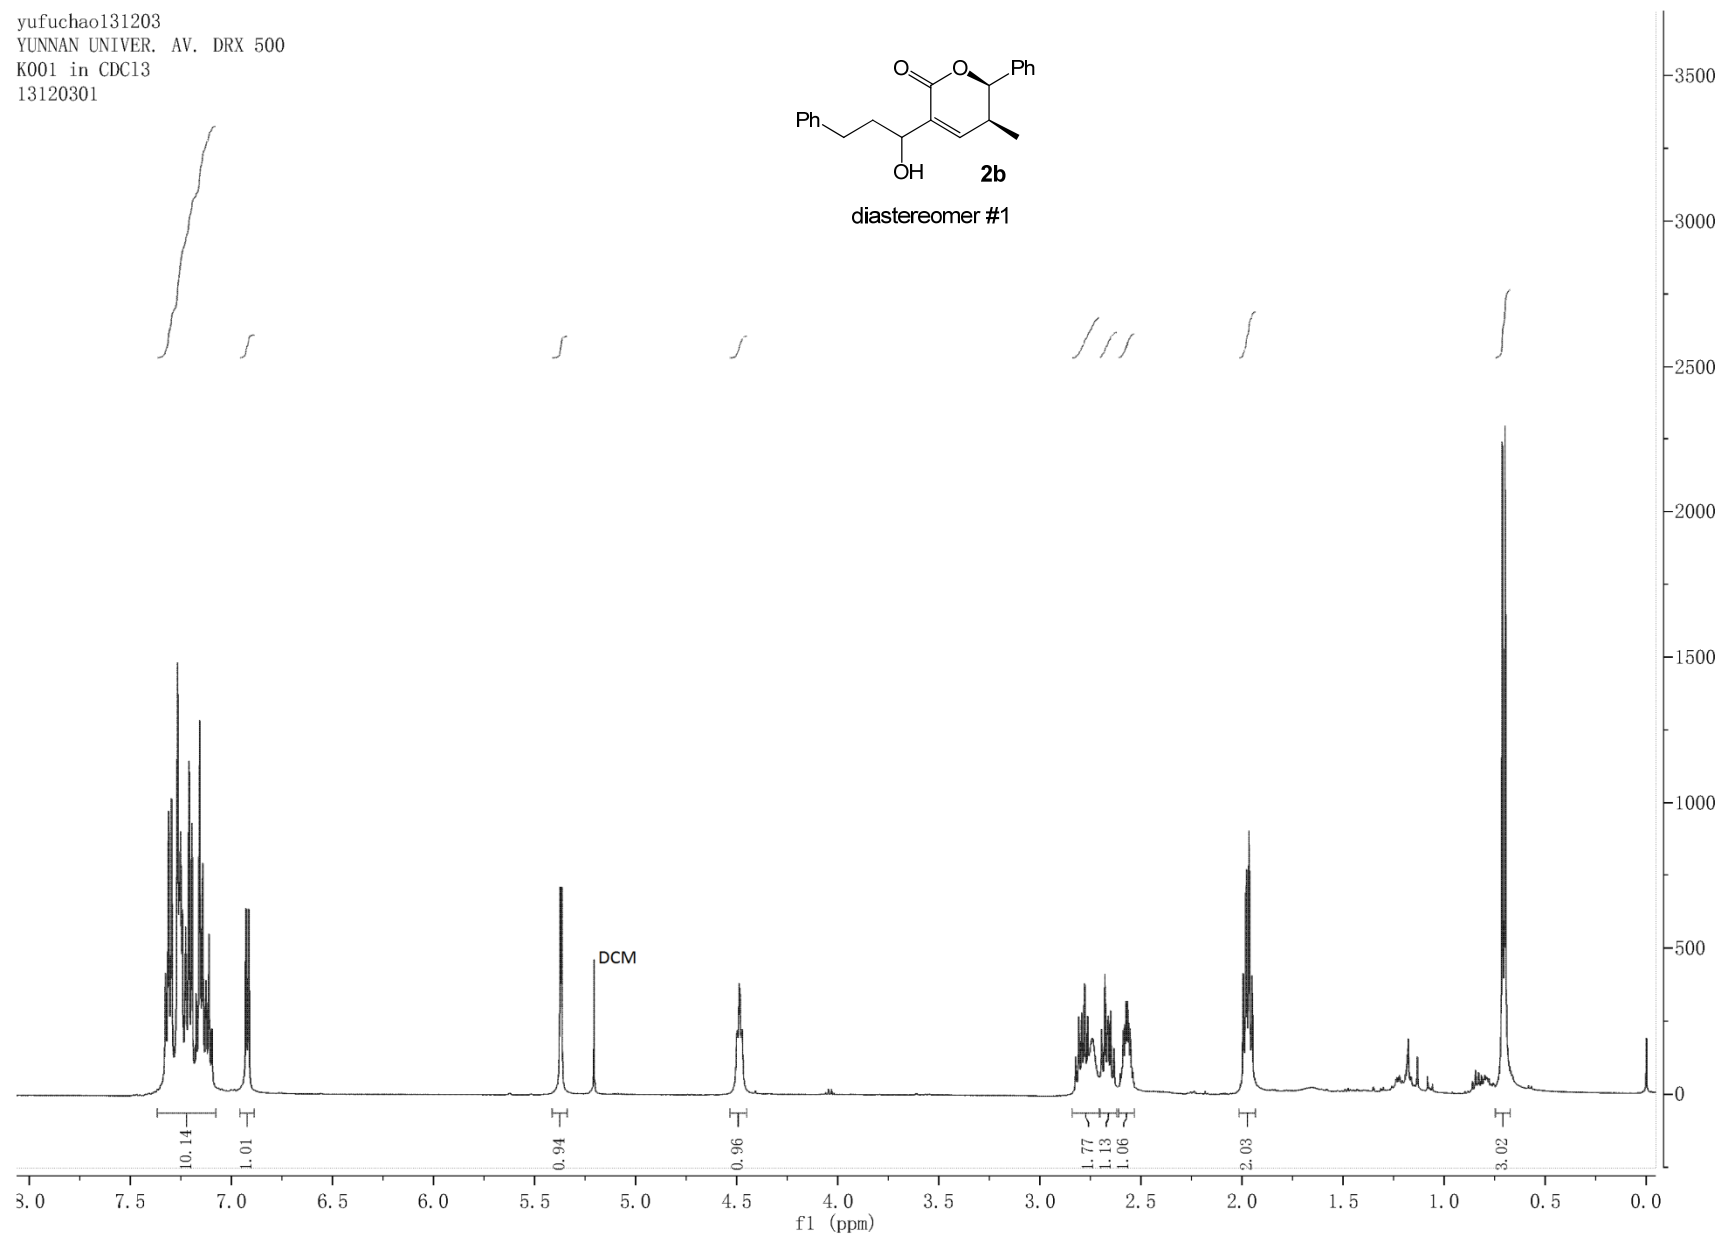

yufuchao131203  
YUNNAN UNIVER. DRX 500  
K001 in CDC13  
13120301

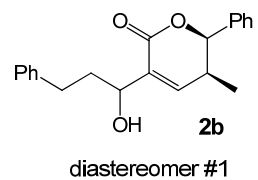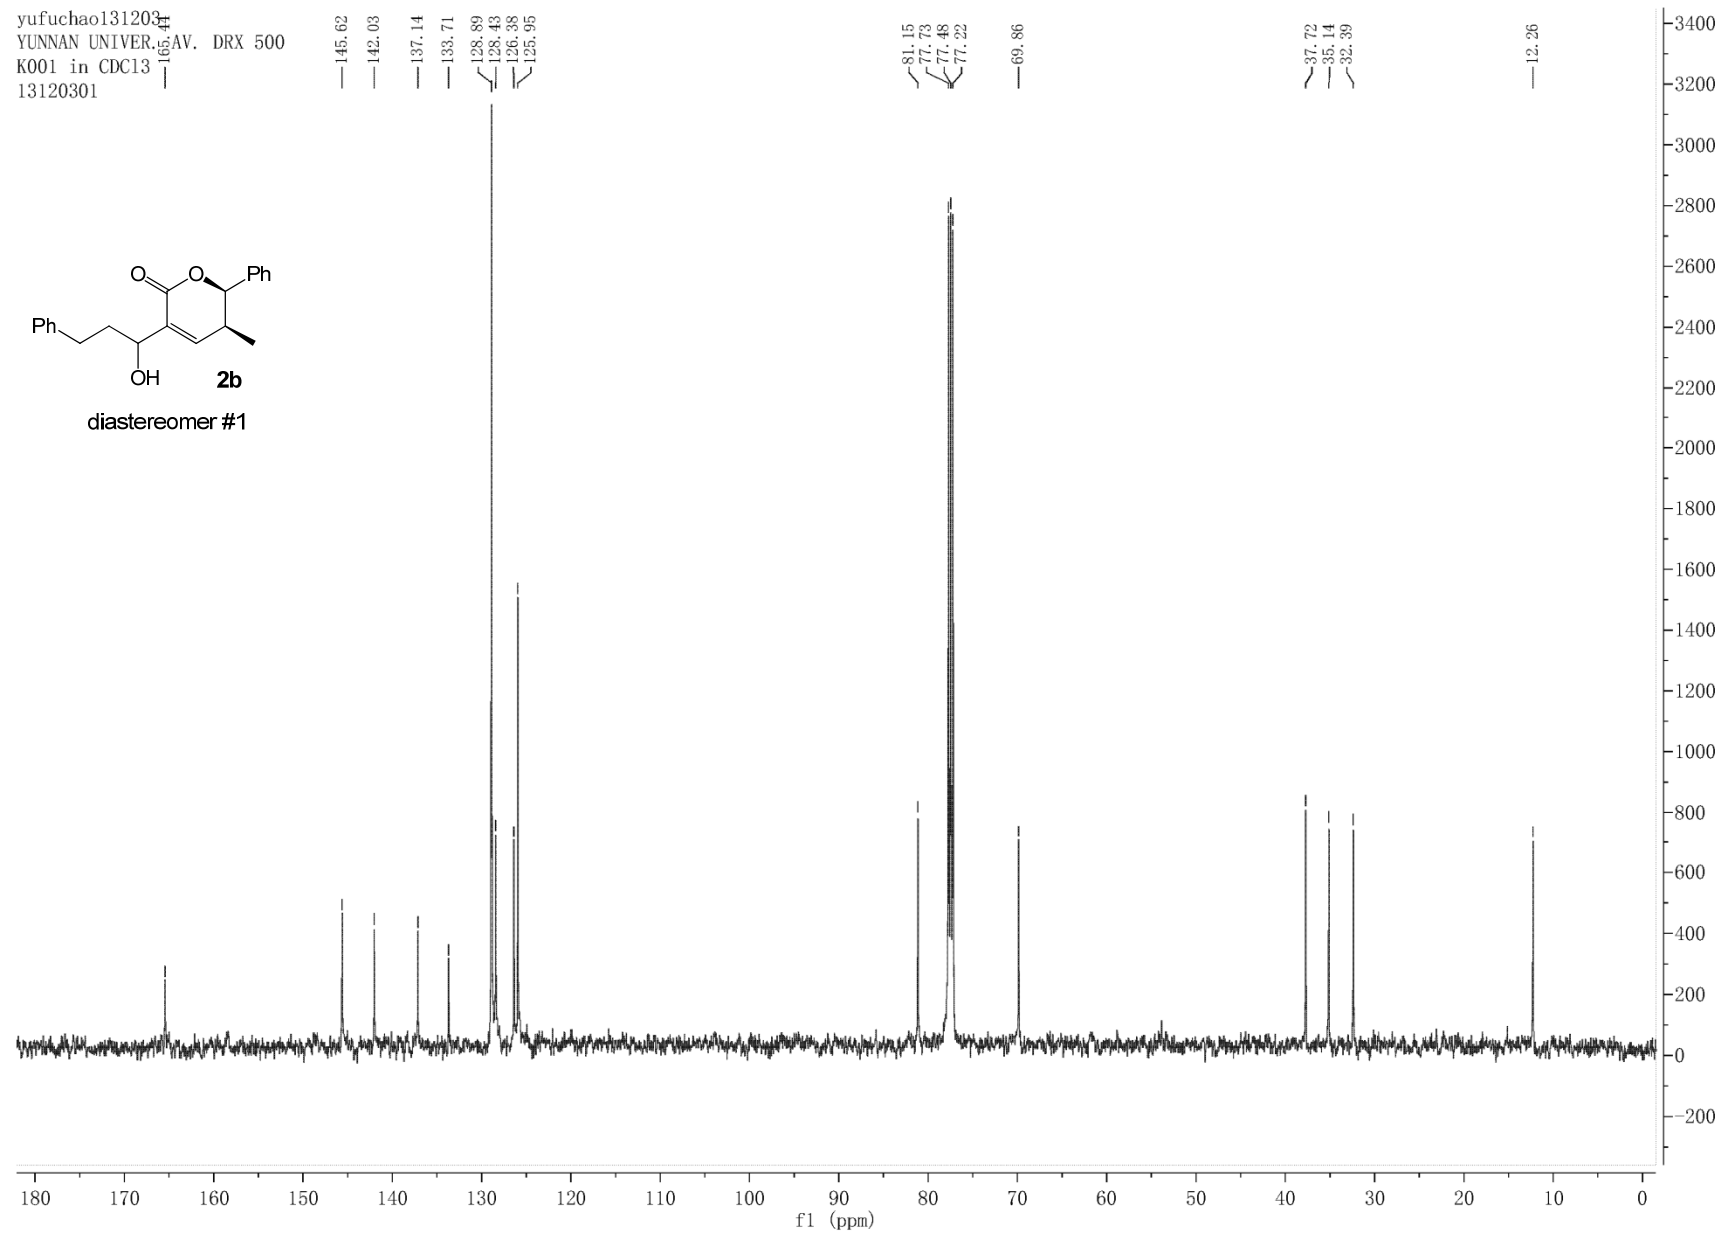

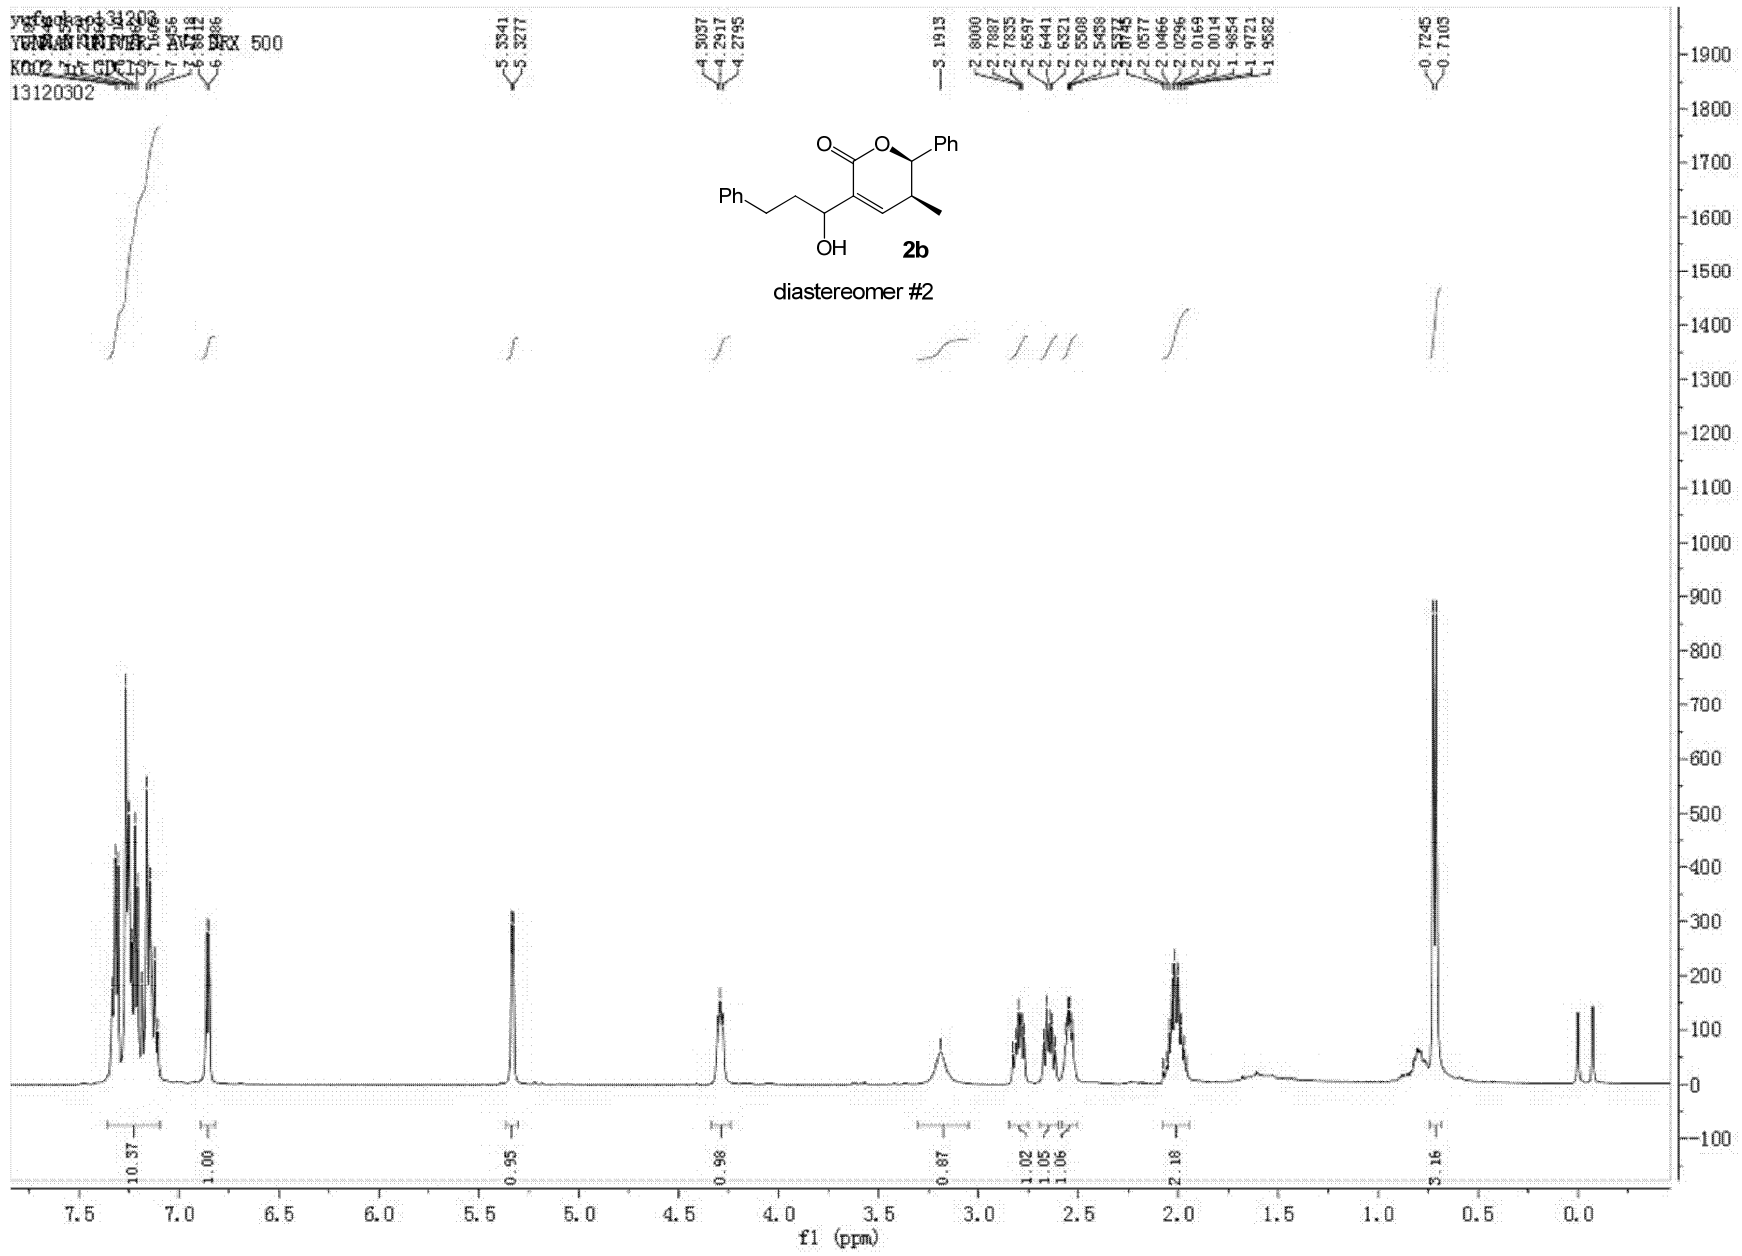

yufuchao131203  
YUNNAN UNIVERSITY AV. DRX 500  
K002 in CDC13  
13120302

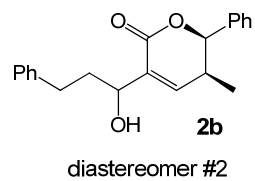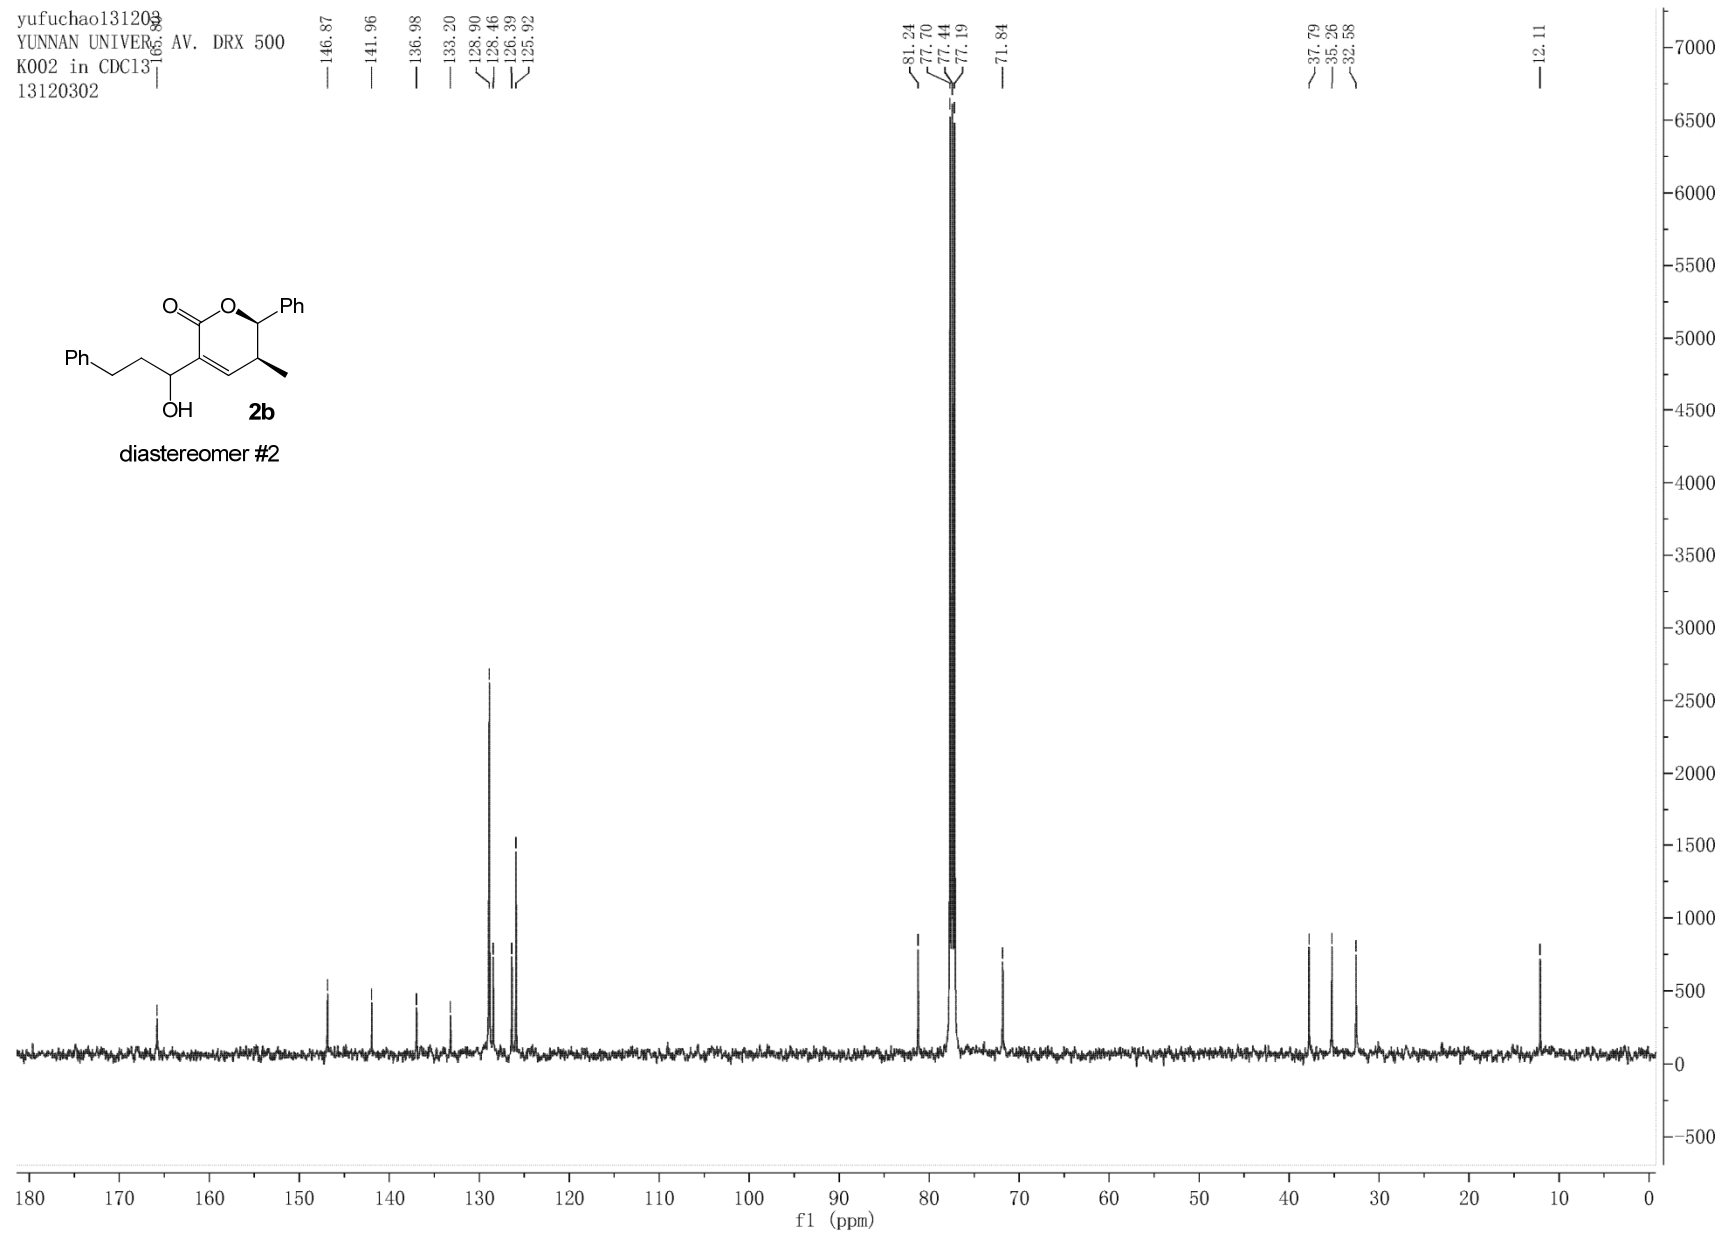

yufuchao140530  
YUNNAN UNIVERSITY AV. DRX 500  
yufuchao KuST793 in CDC13  
14052811

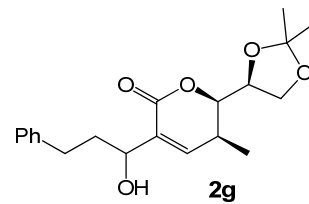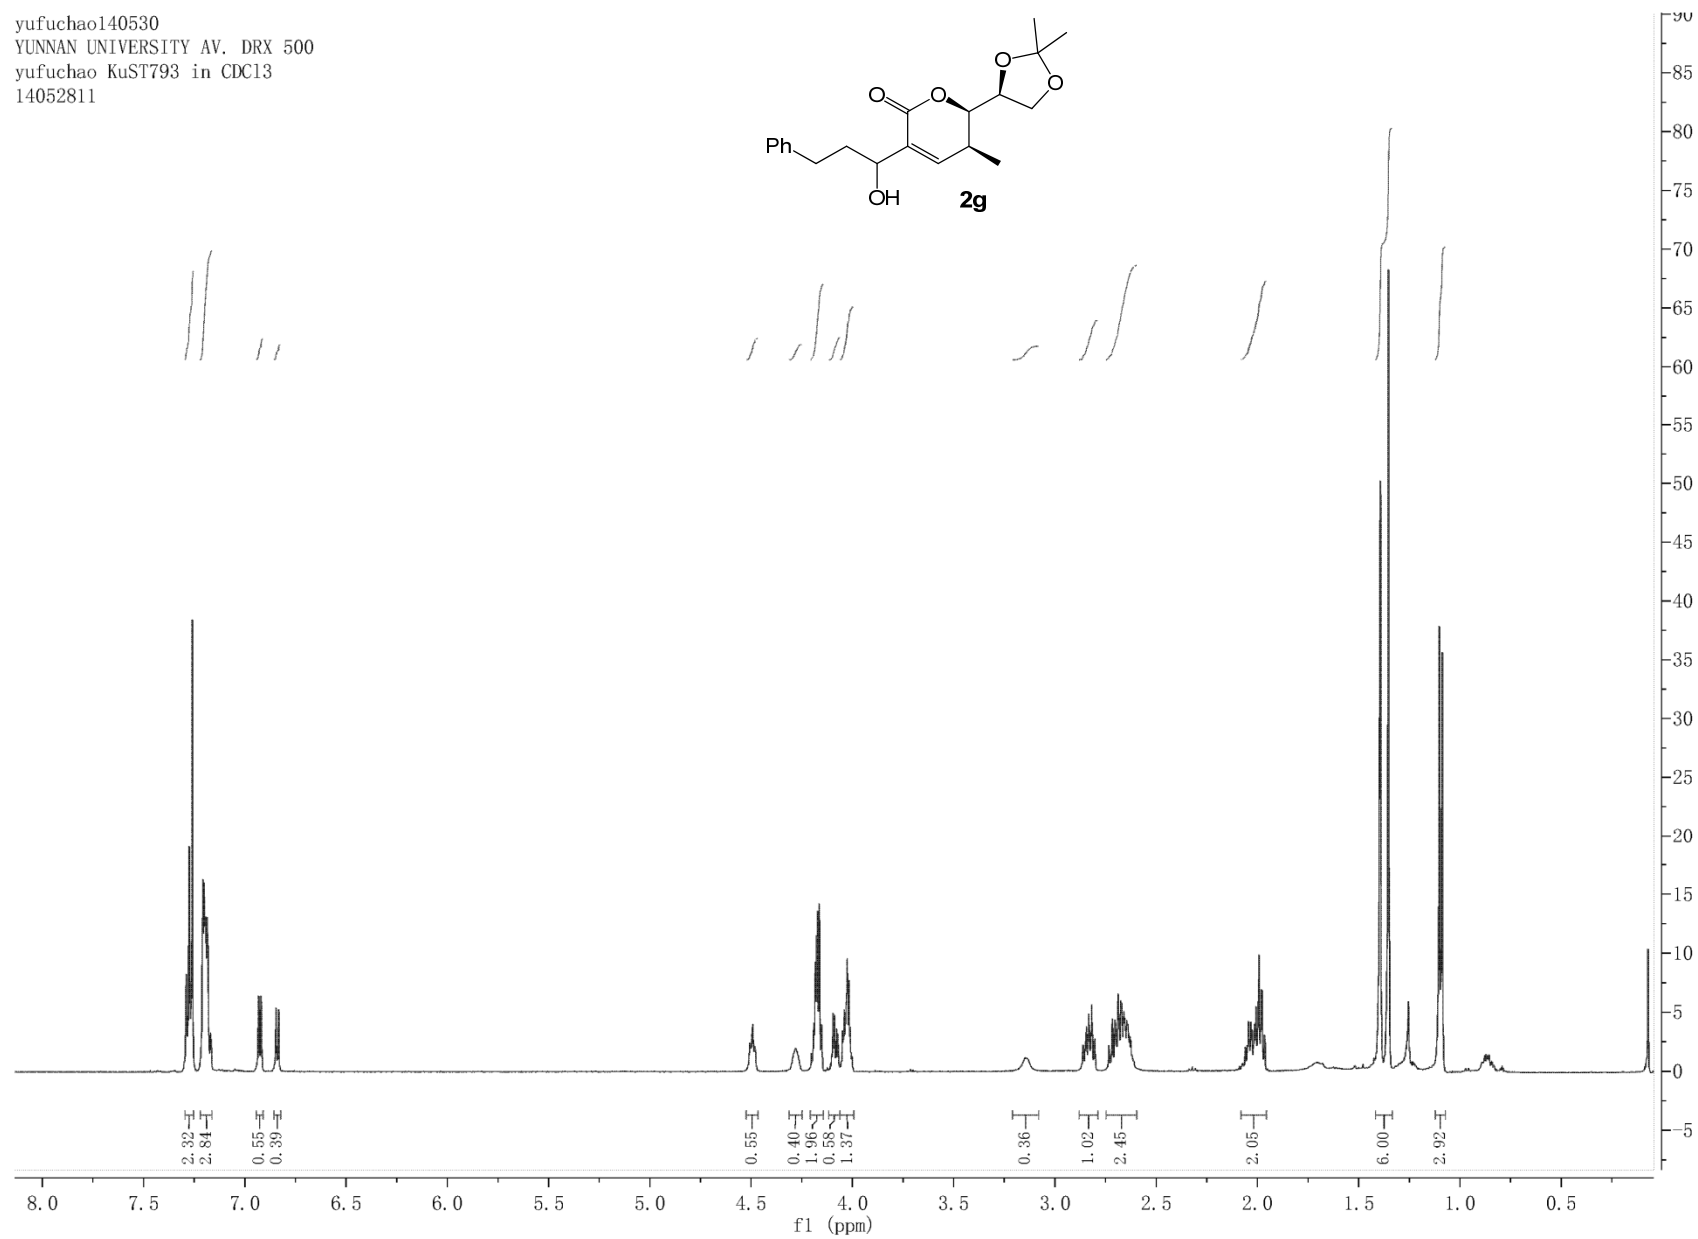



yufuchao140530  
YUNNAN UNIVERSITY, DRX 500  
yufuchao KuST in CDC13  
14052811

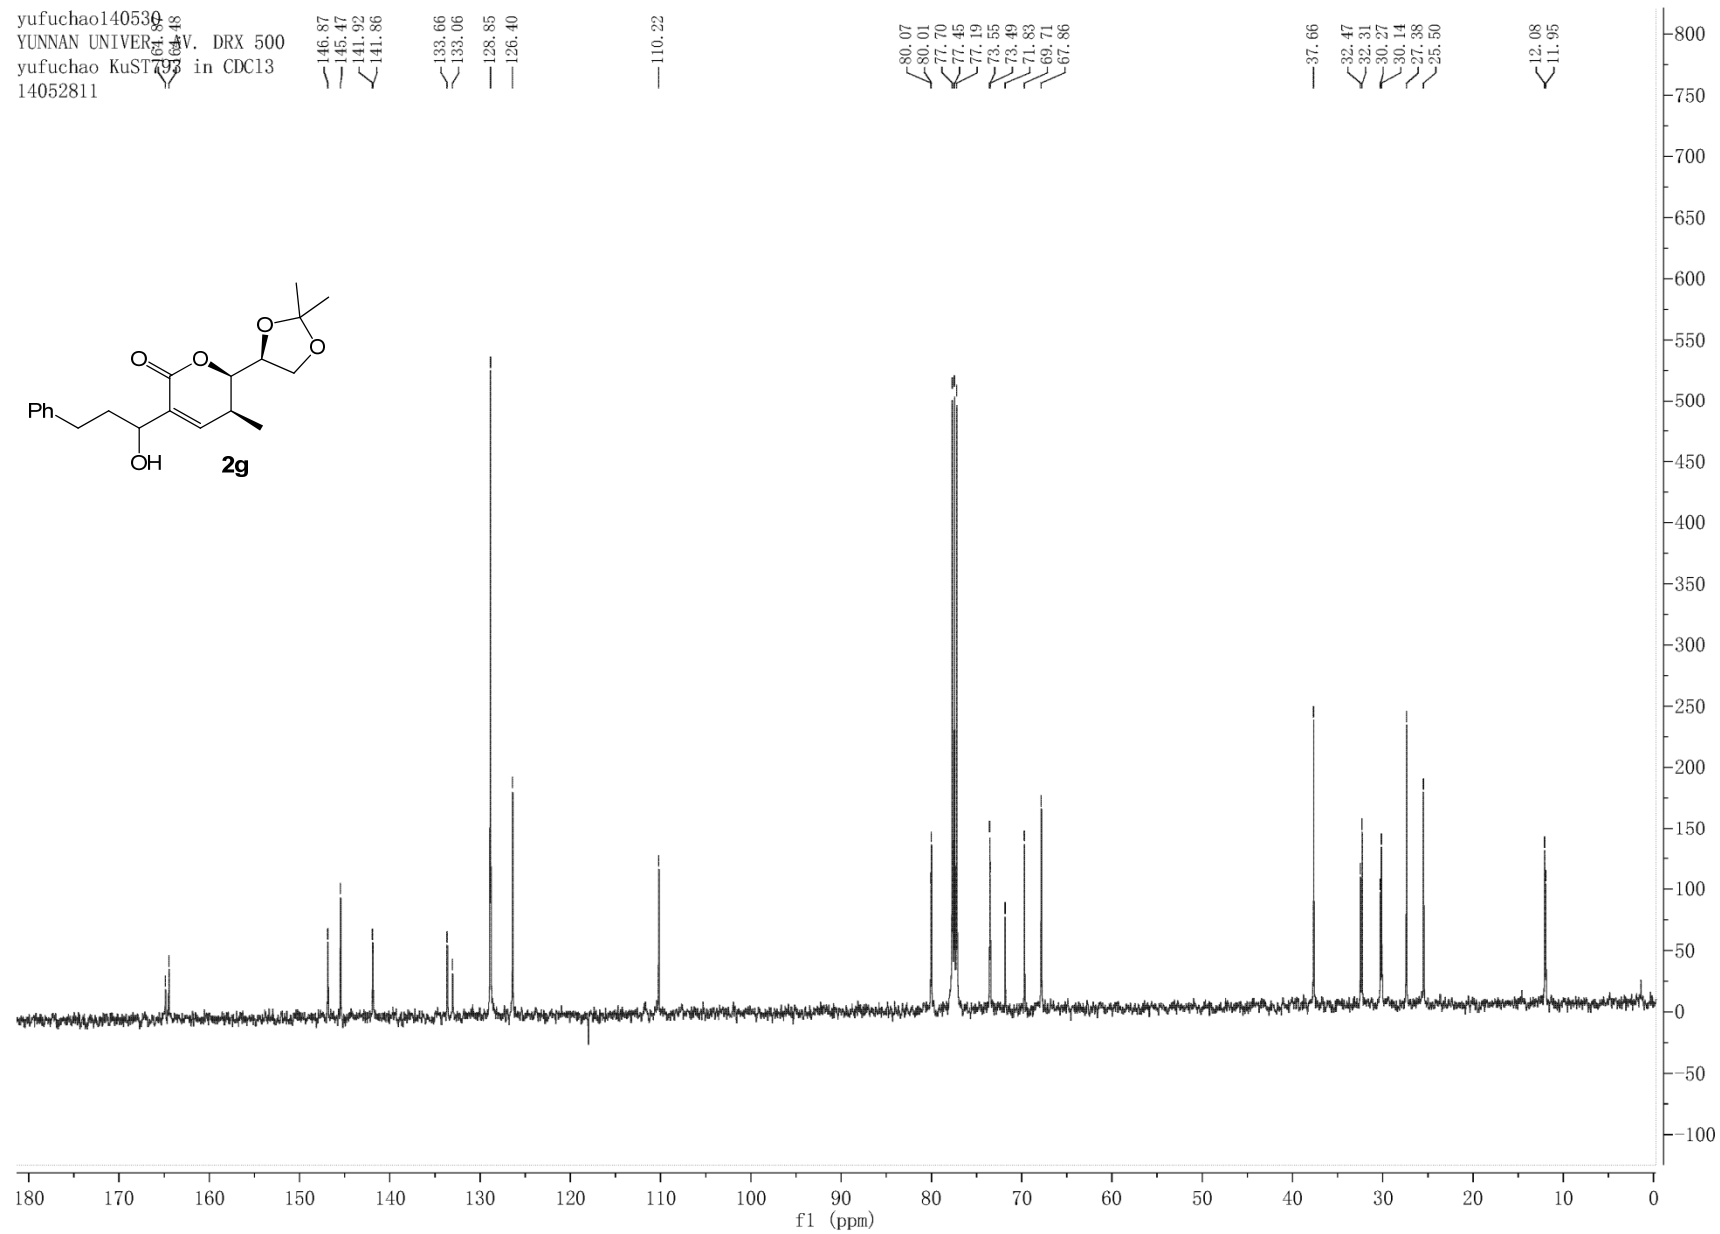

2014753-f1-k03hh\_pslabel\_01  
Gradient Shimming

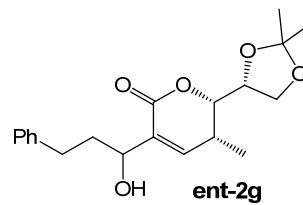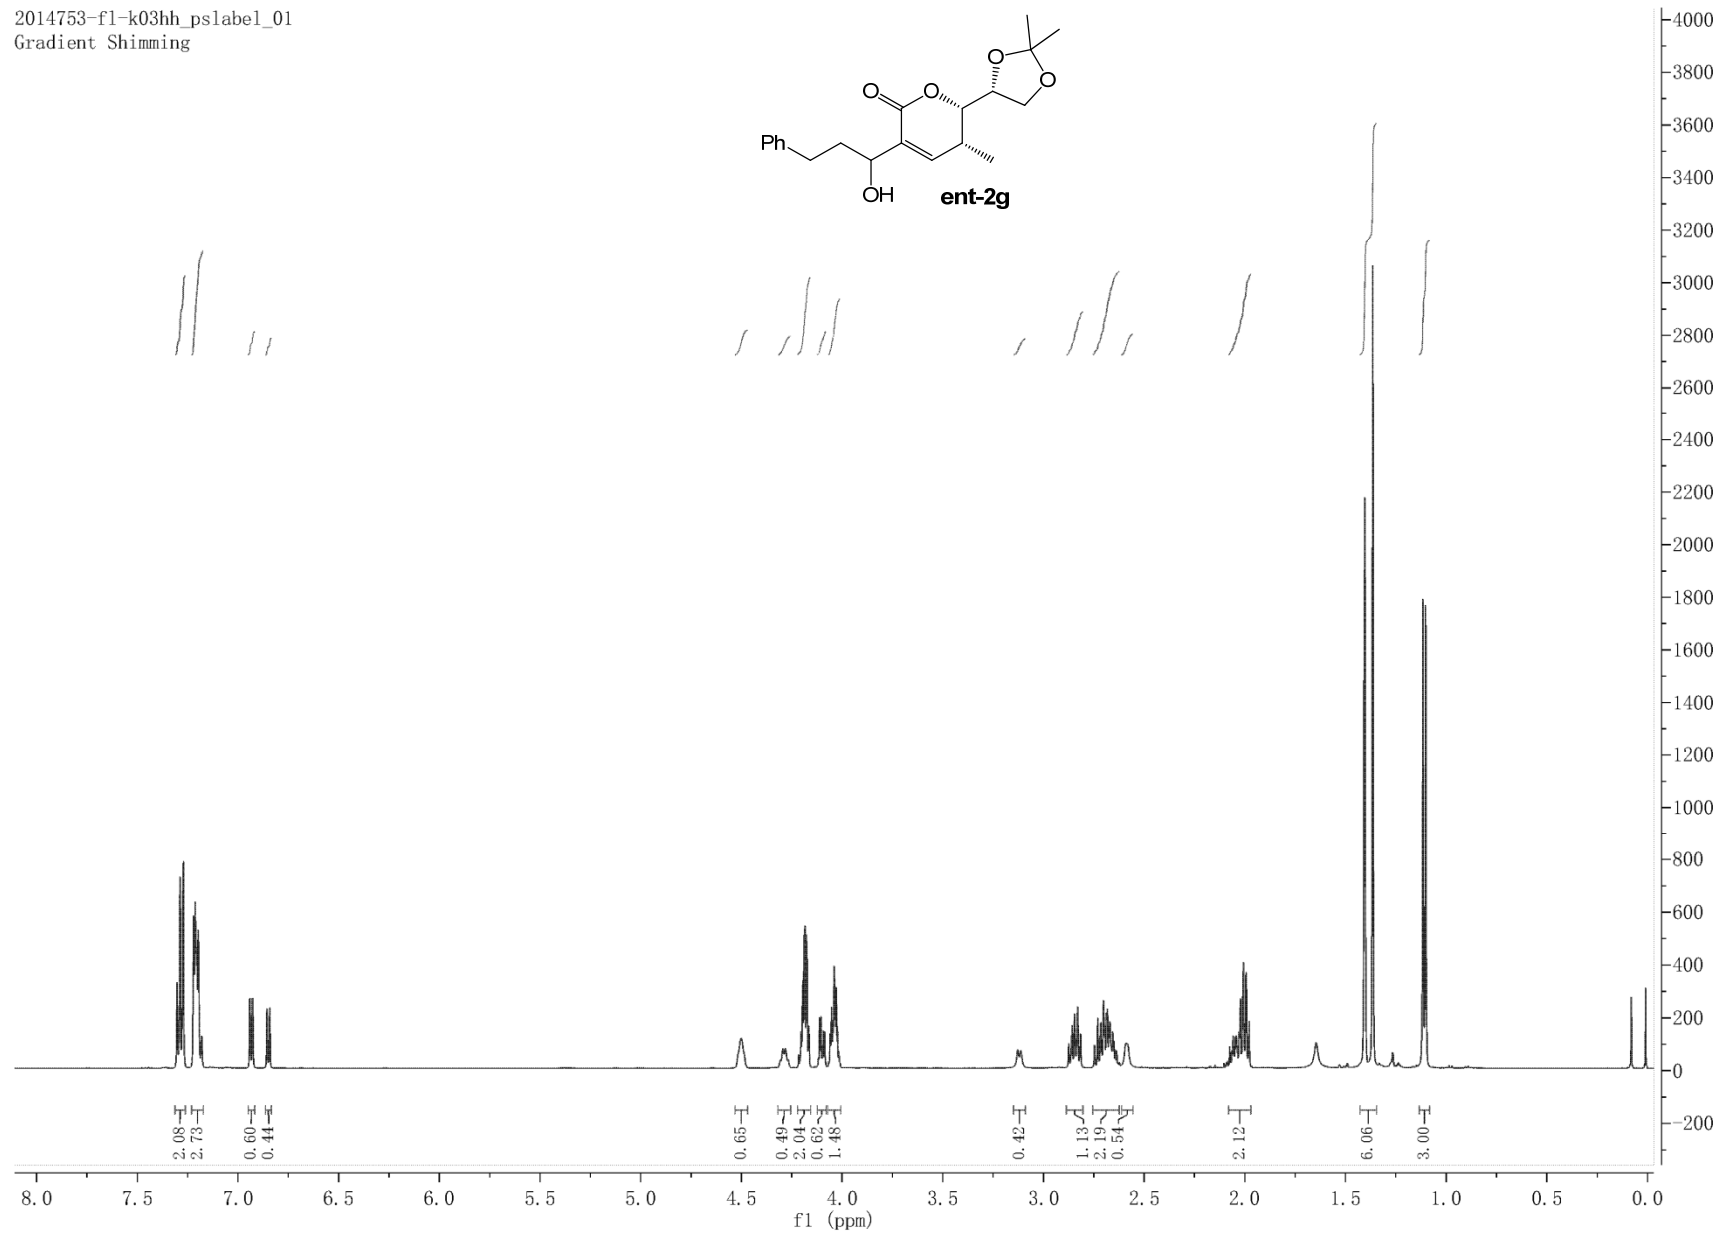

2014753-f1-k036-pslabel\_01  
Gradient Shimadzu

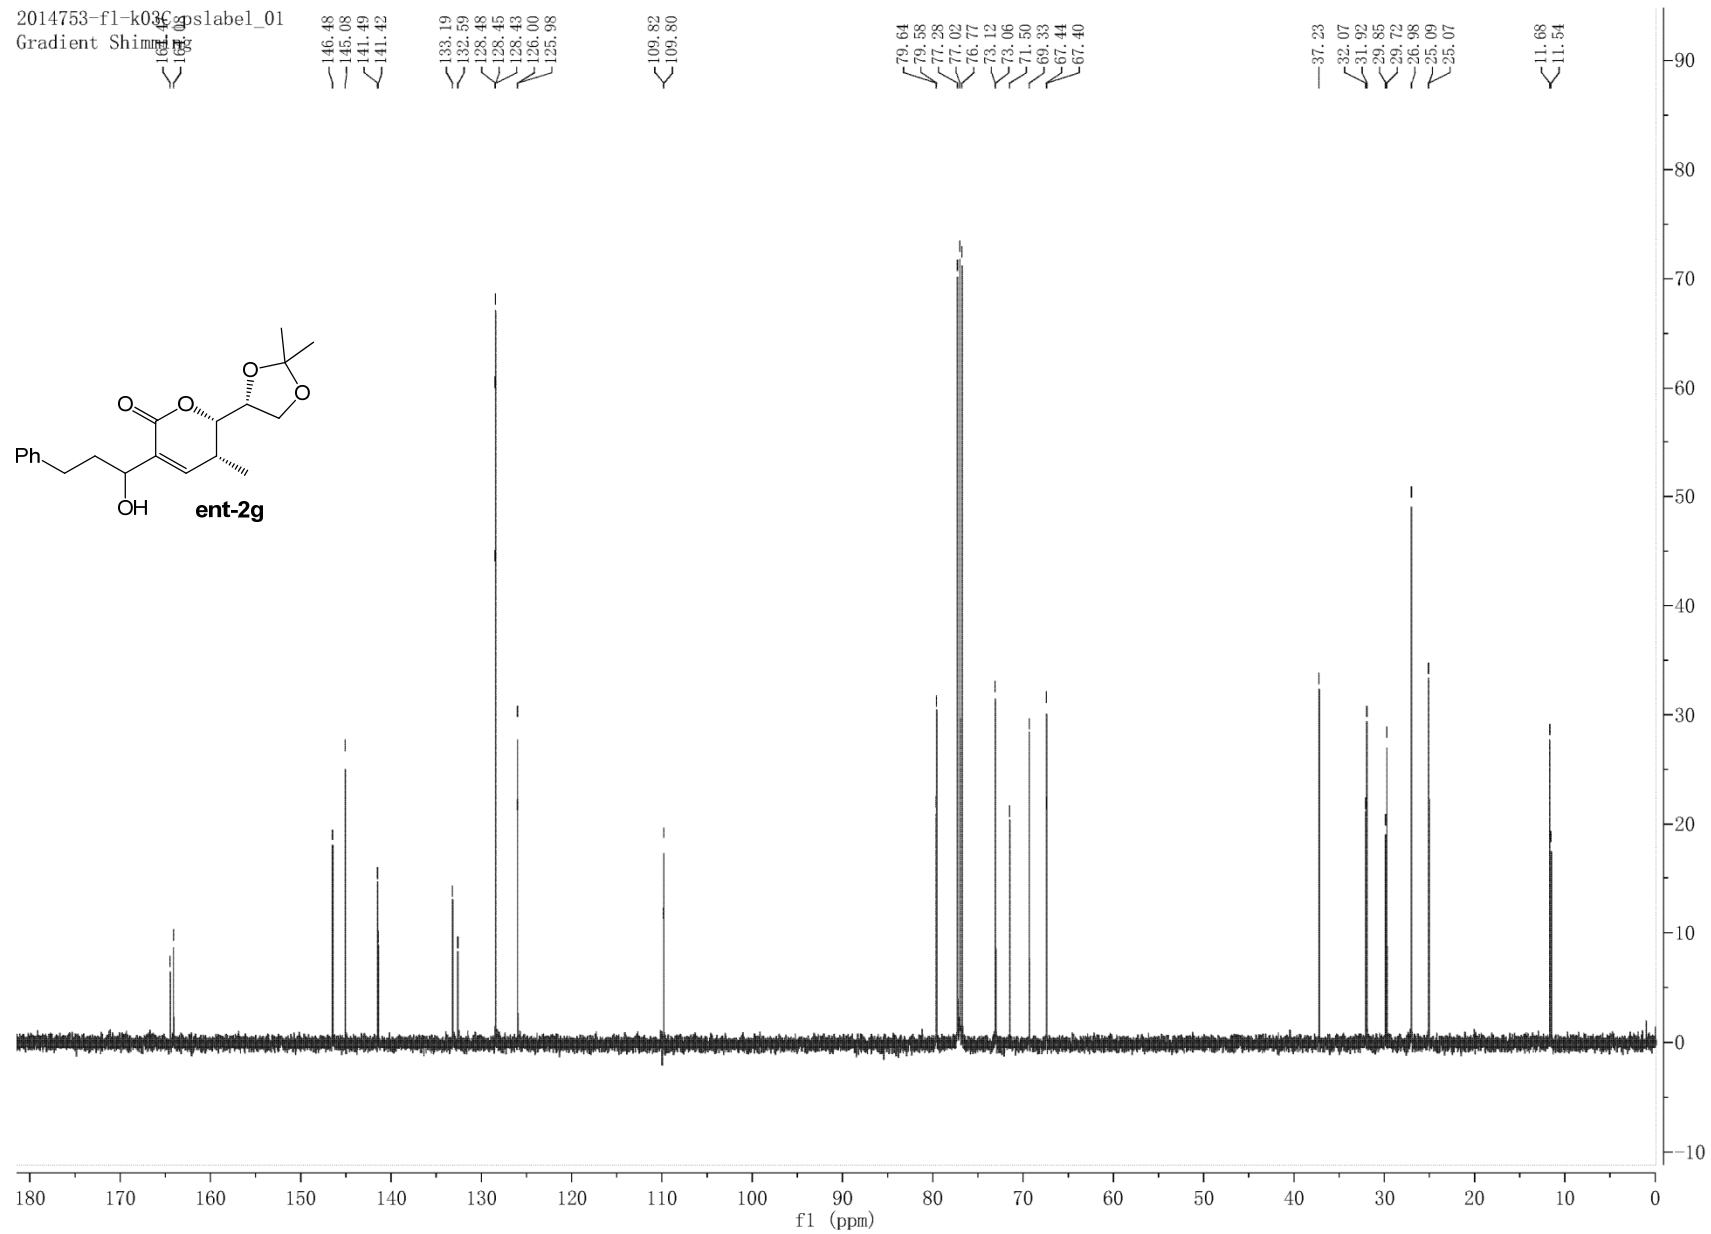

yfc-140520NMR  
YUNNAN UNIVERSITY AV. DRX 500  
yufuchao KuST774 in CDC13  
14052004

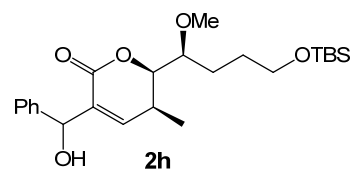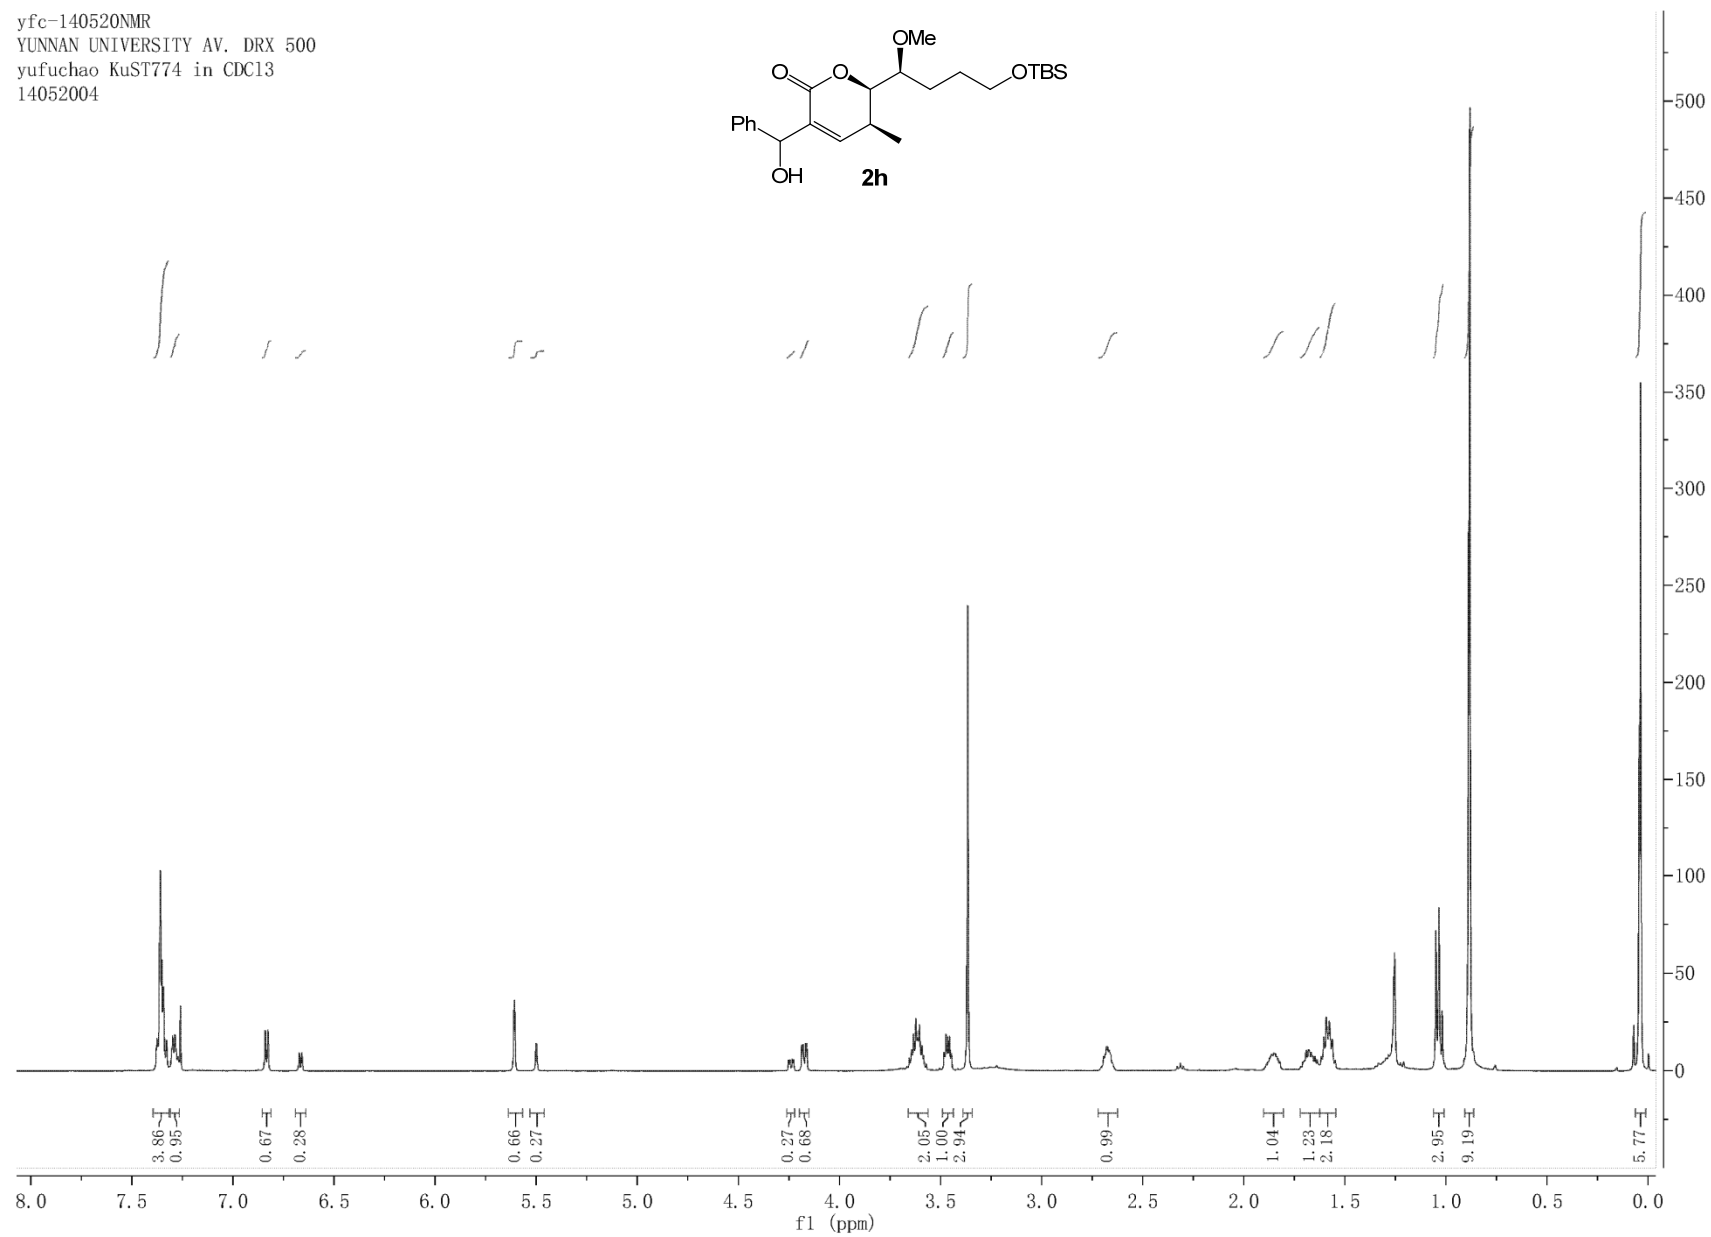

yfc-140520NMB  
YUNNAN UNIVERSITY  
yufuchao Kus  
14052004

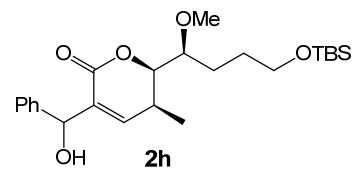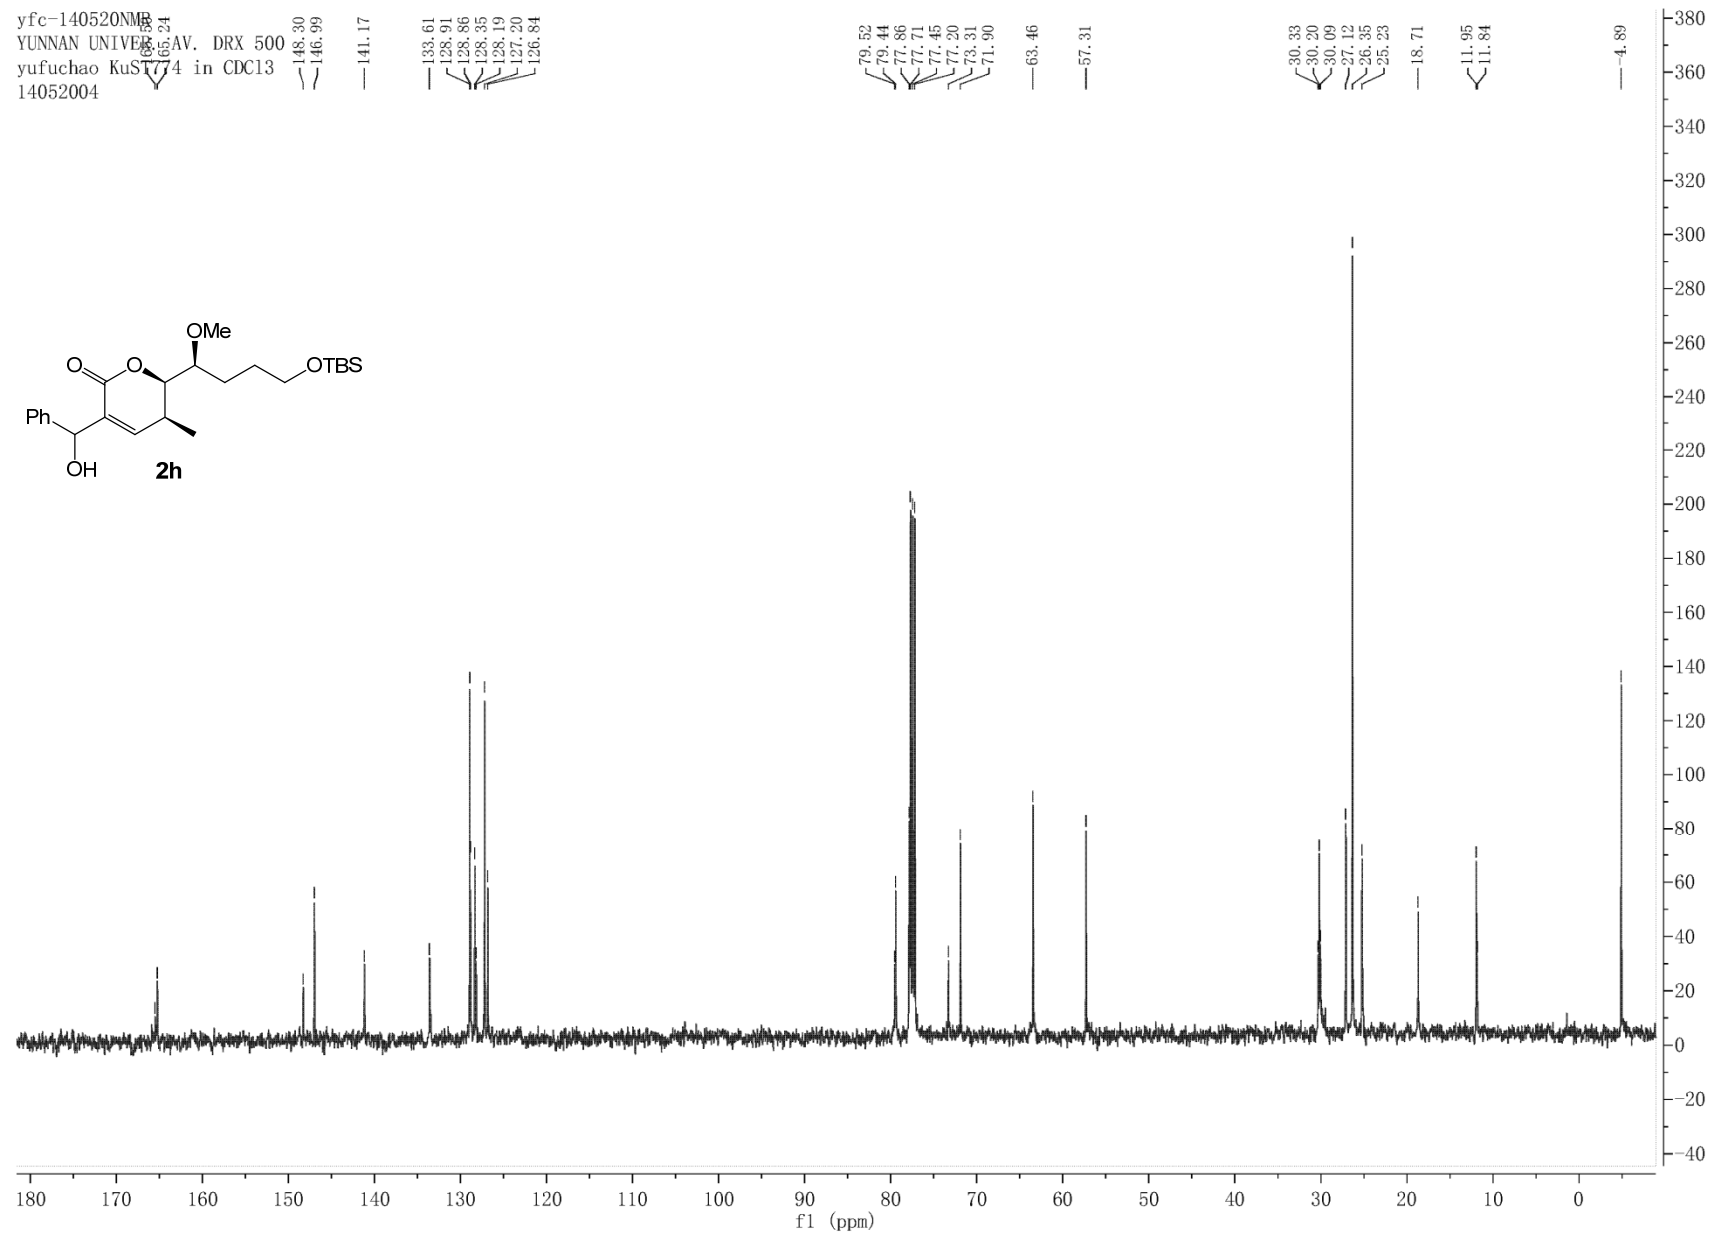

140520NMR  
YUNNAN UNIVERSITY AV. DRX 500  
yufuchao KuST775 in CDC13  
14052005

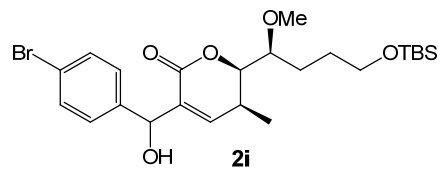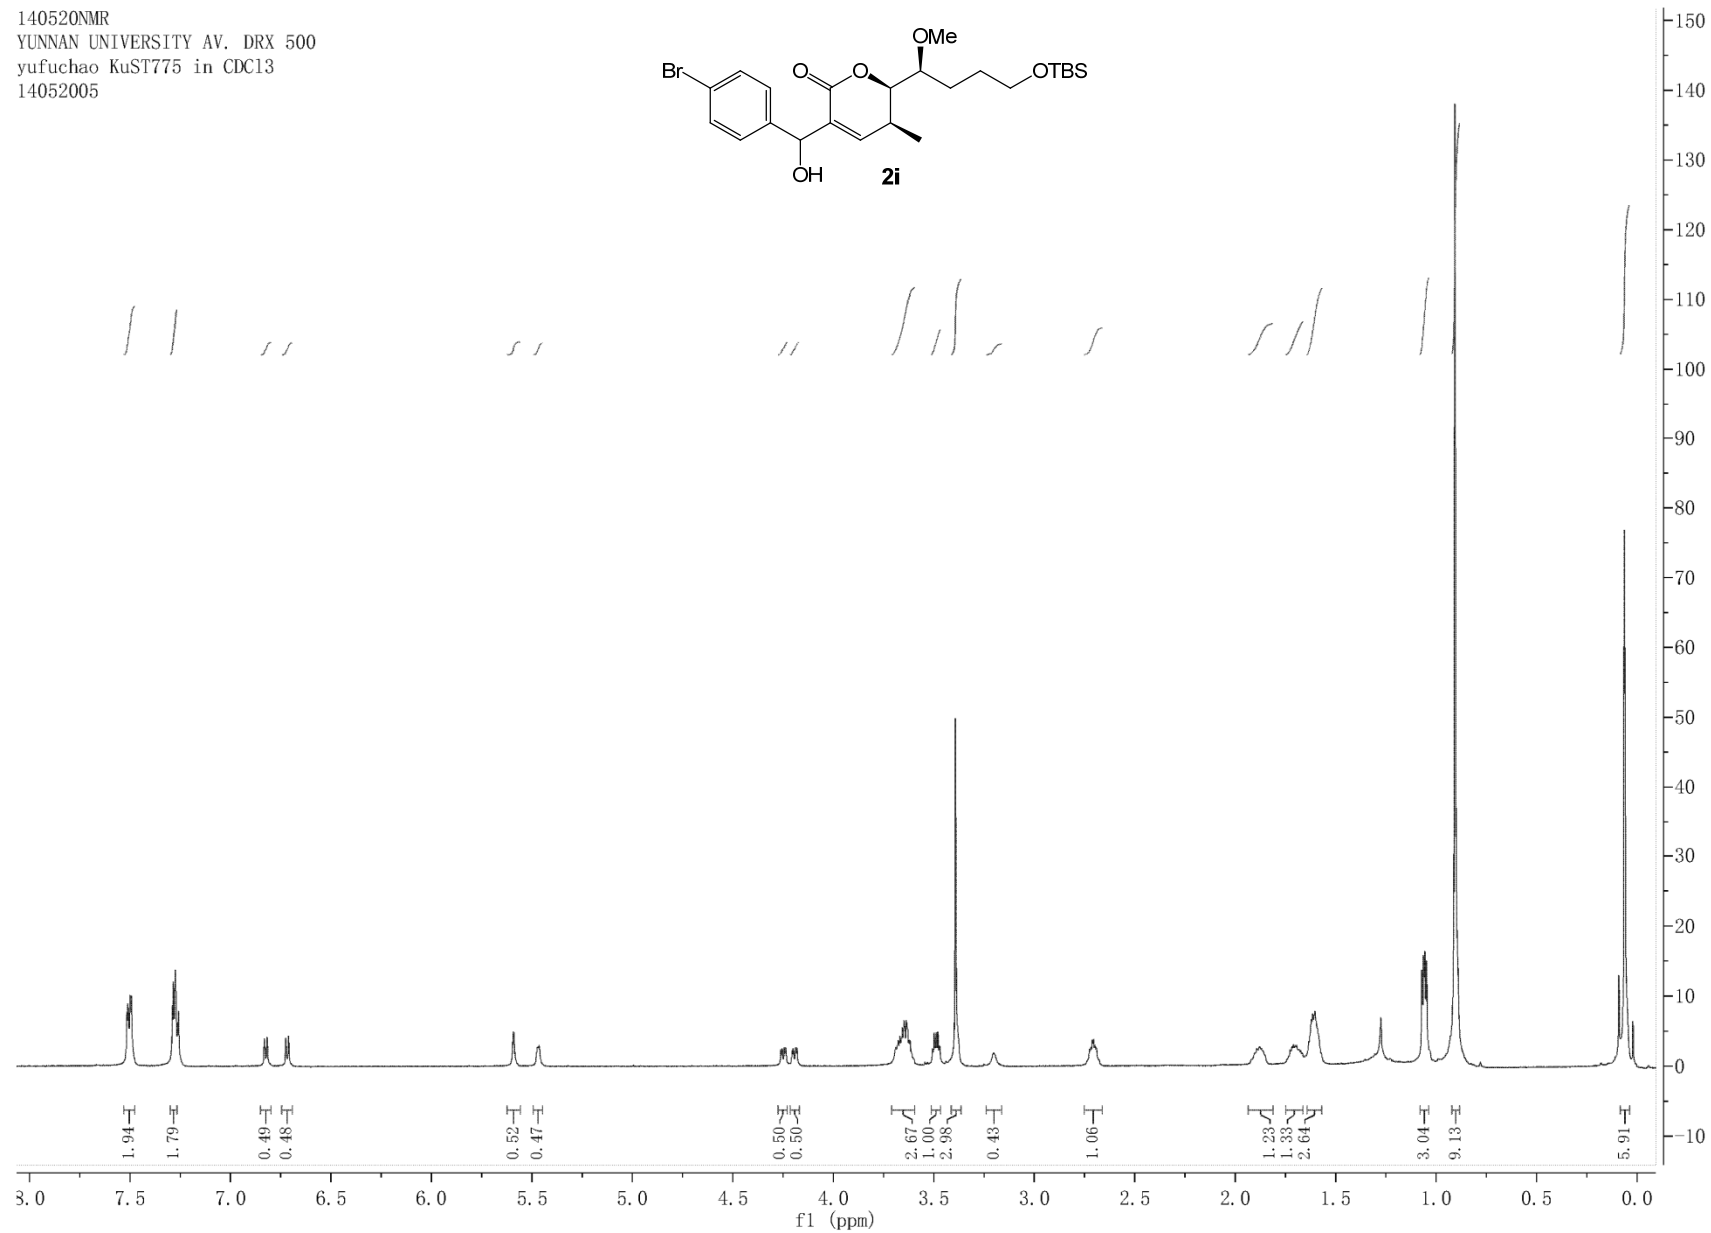

140520NMR  
YUNNAN UNIVERSITY  
yufuchao Kusin in CDC13  
14052005

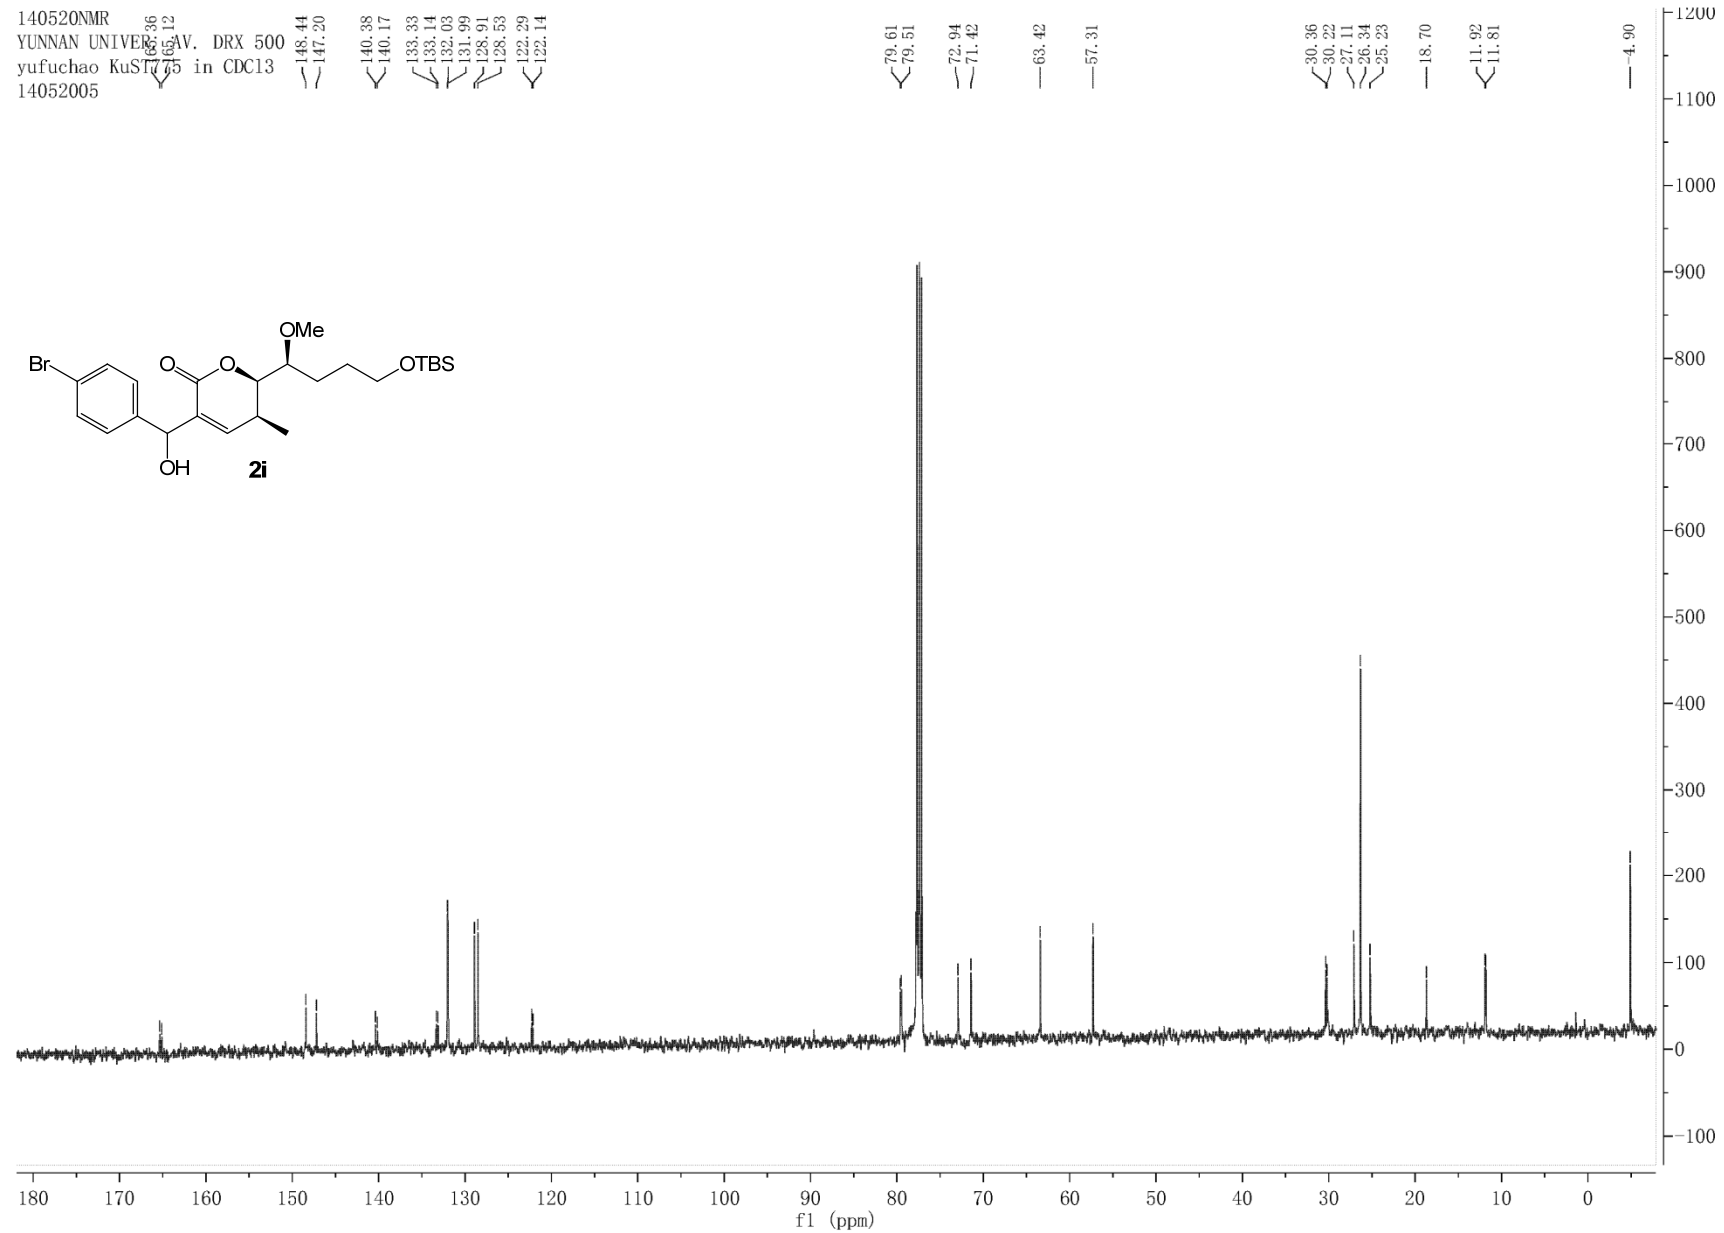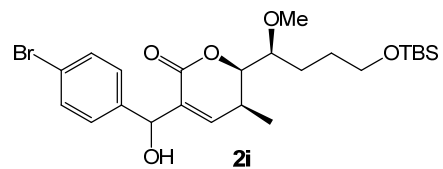

140620NMR  
YUNNAN UNIVERSITY AV. DRX 500  
yufuchao KuST812 in CDC13  
14061808

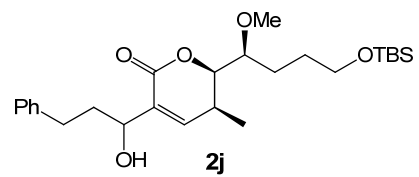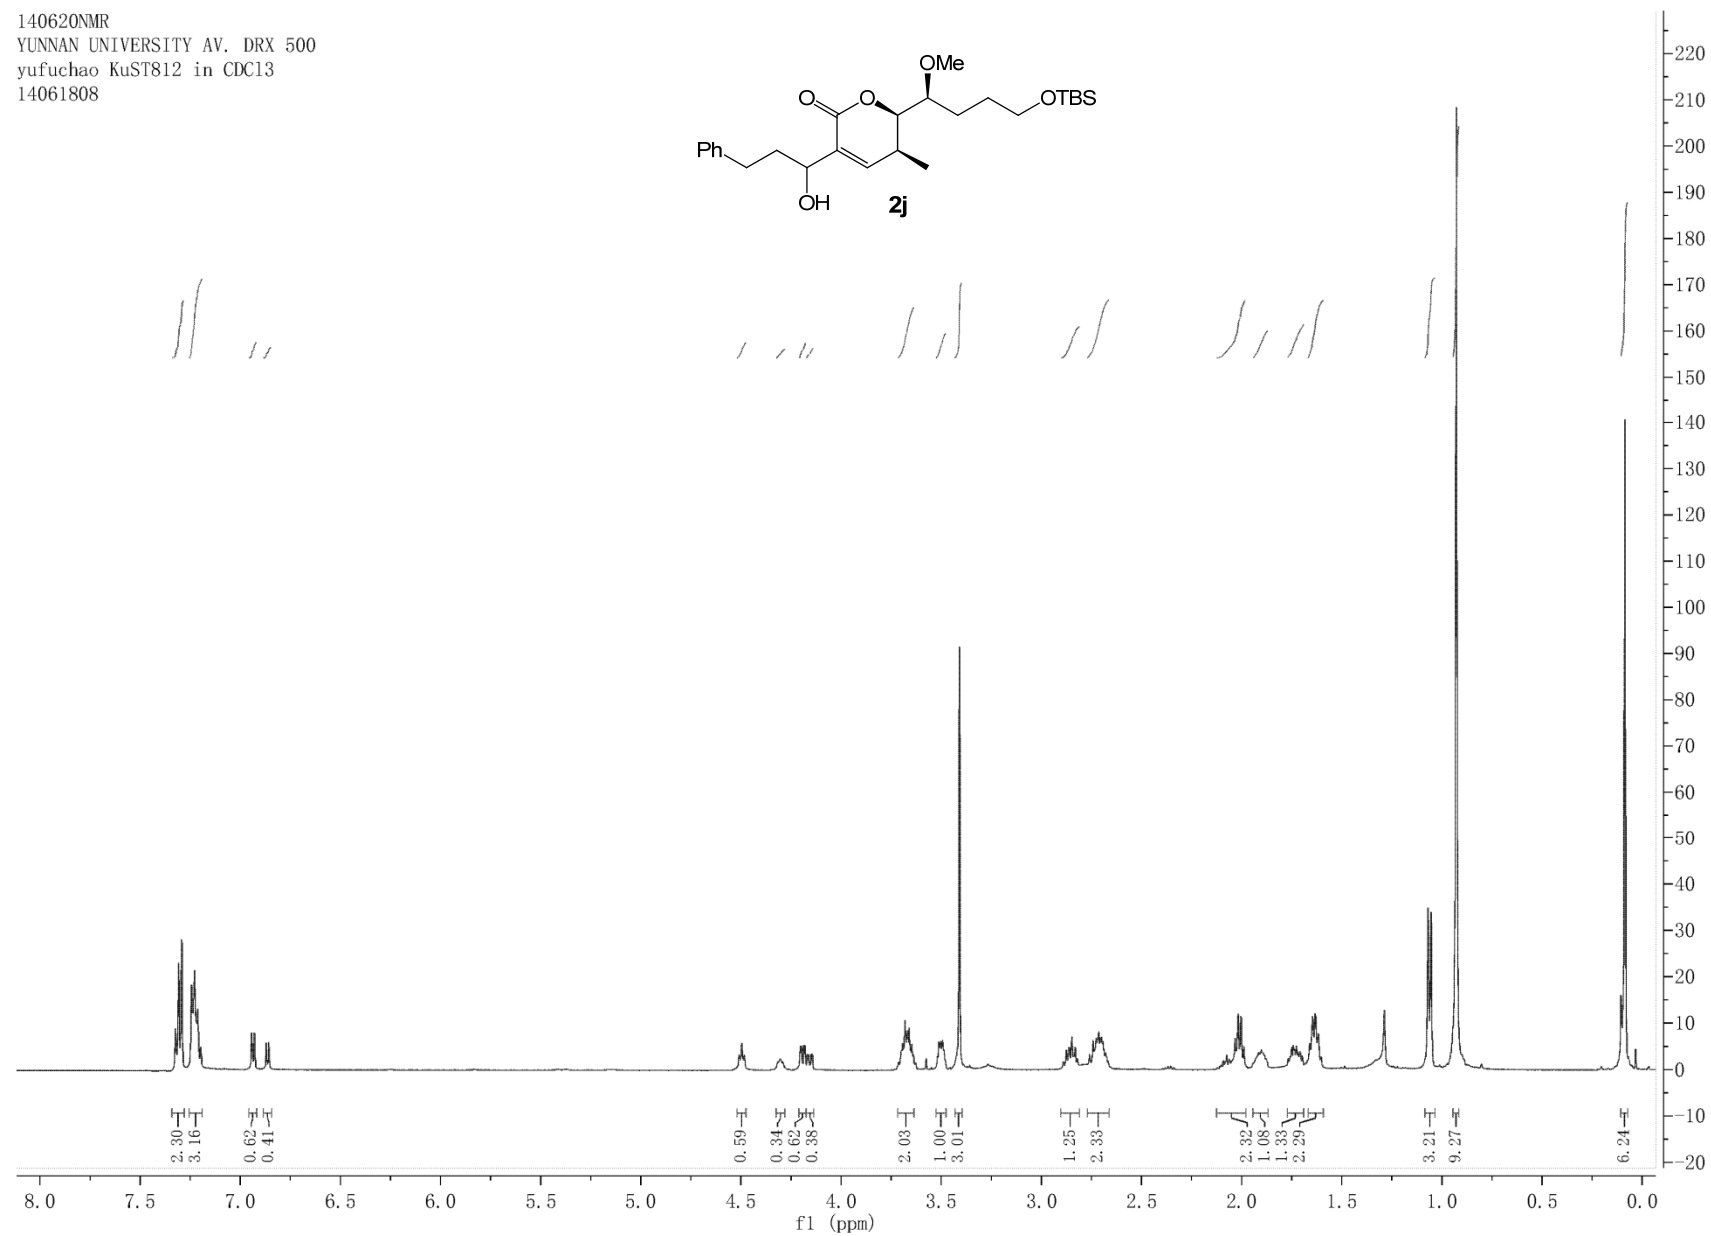



140620NMR  
YUNNAN UNIVERSITY  
yufuchao Kusong  
14061808

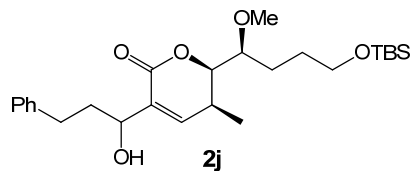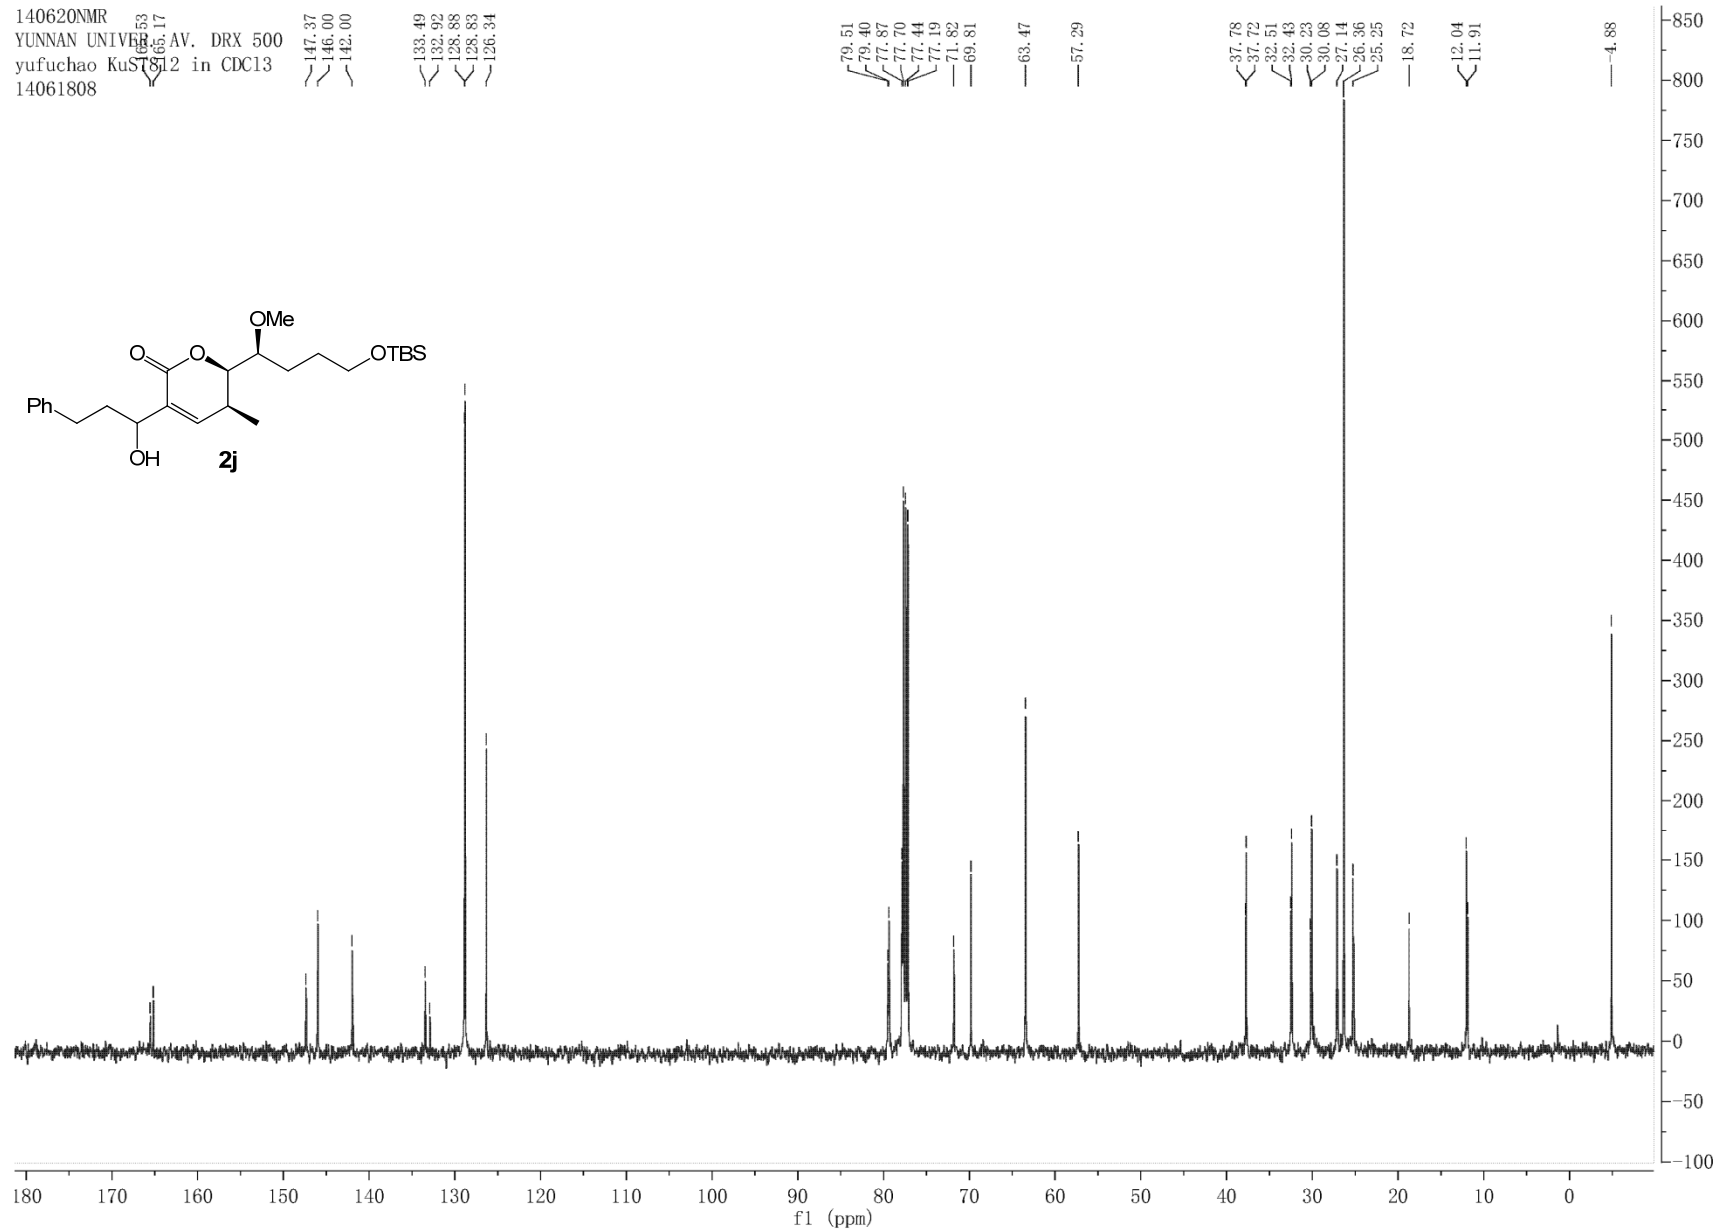

yufuchao140530  
YUNNAN UNIVERSITY AV. DRX 500  
yufuchao KuST790 in CDC13  
14052809

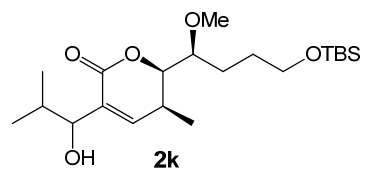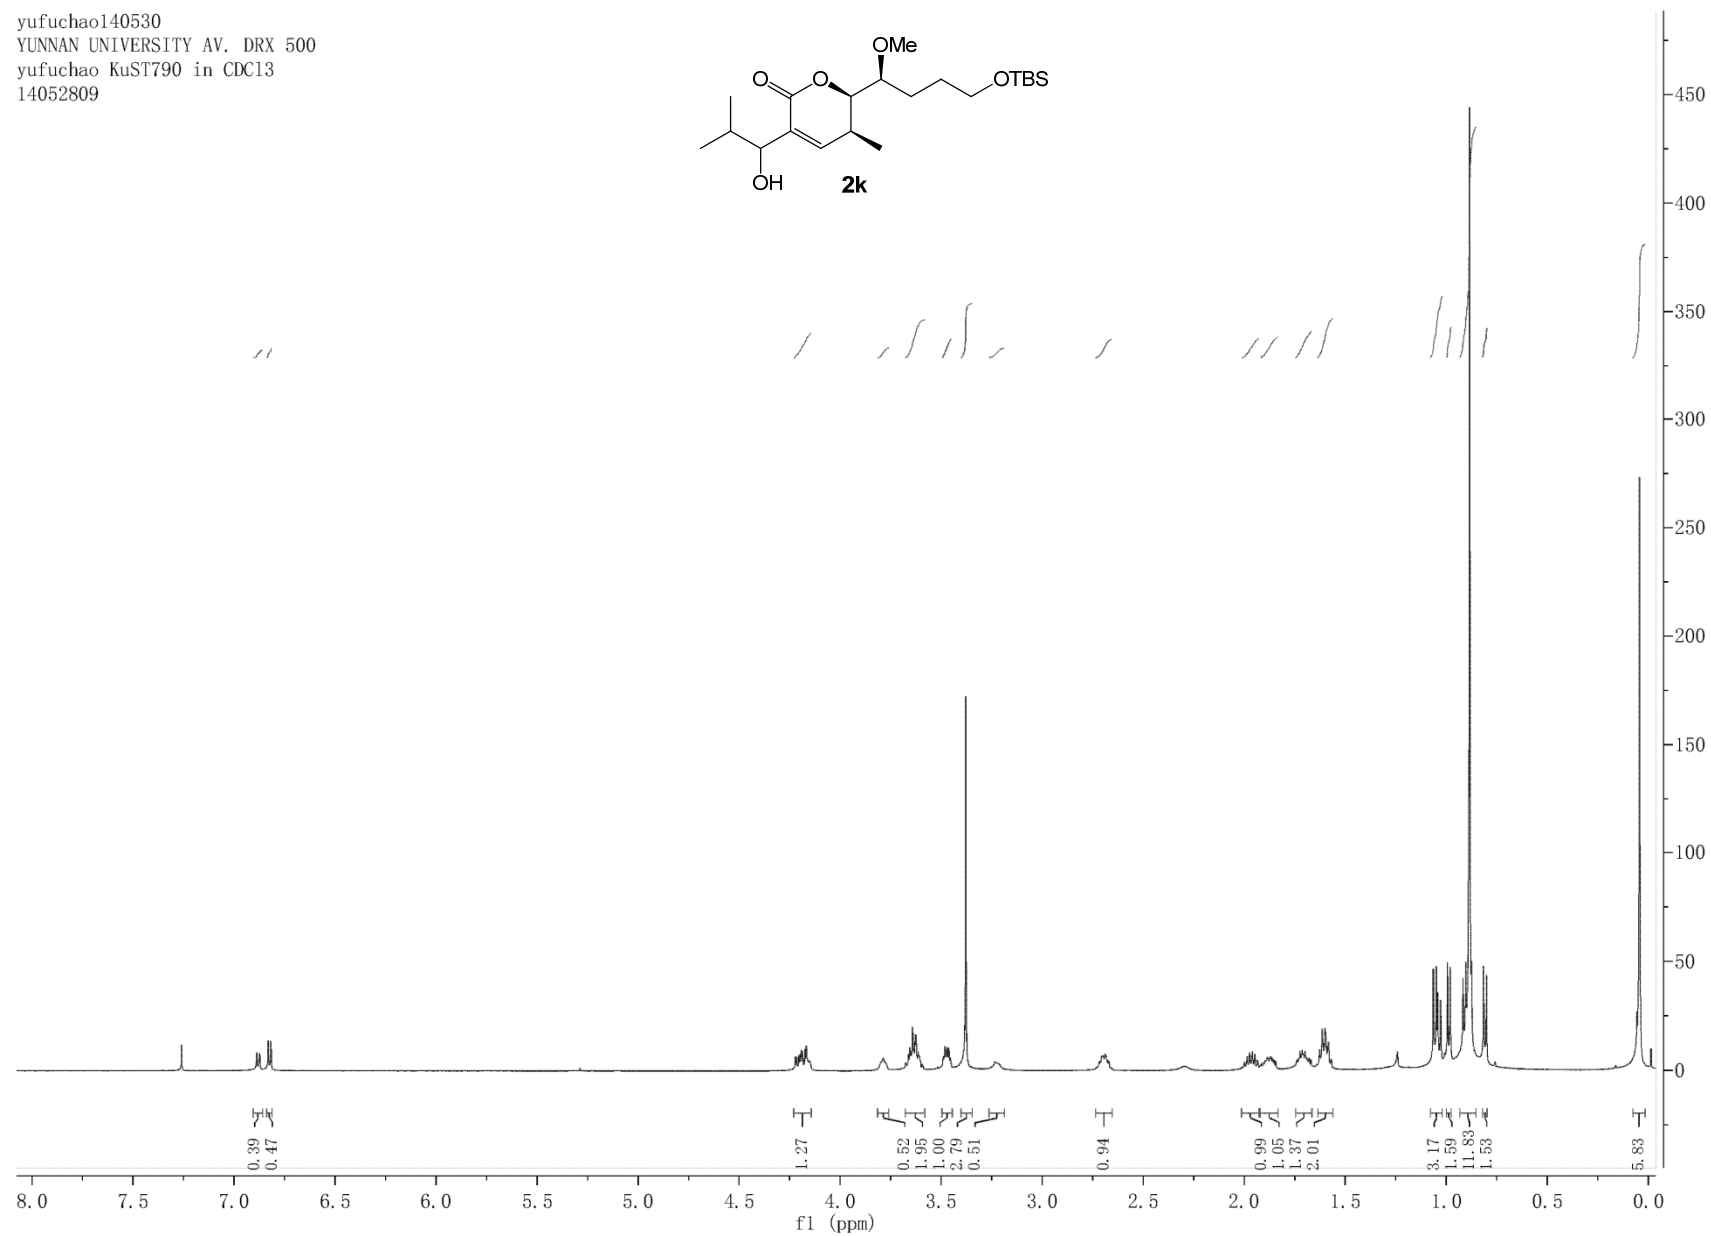

yufuchao140580  
YUNNAN UNIVERSITY AV. DRX 500  
yufuchao Kus1790 in CDC13  
14052809

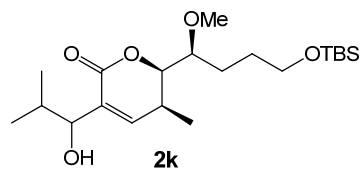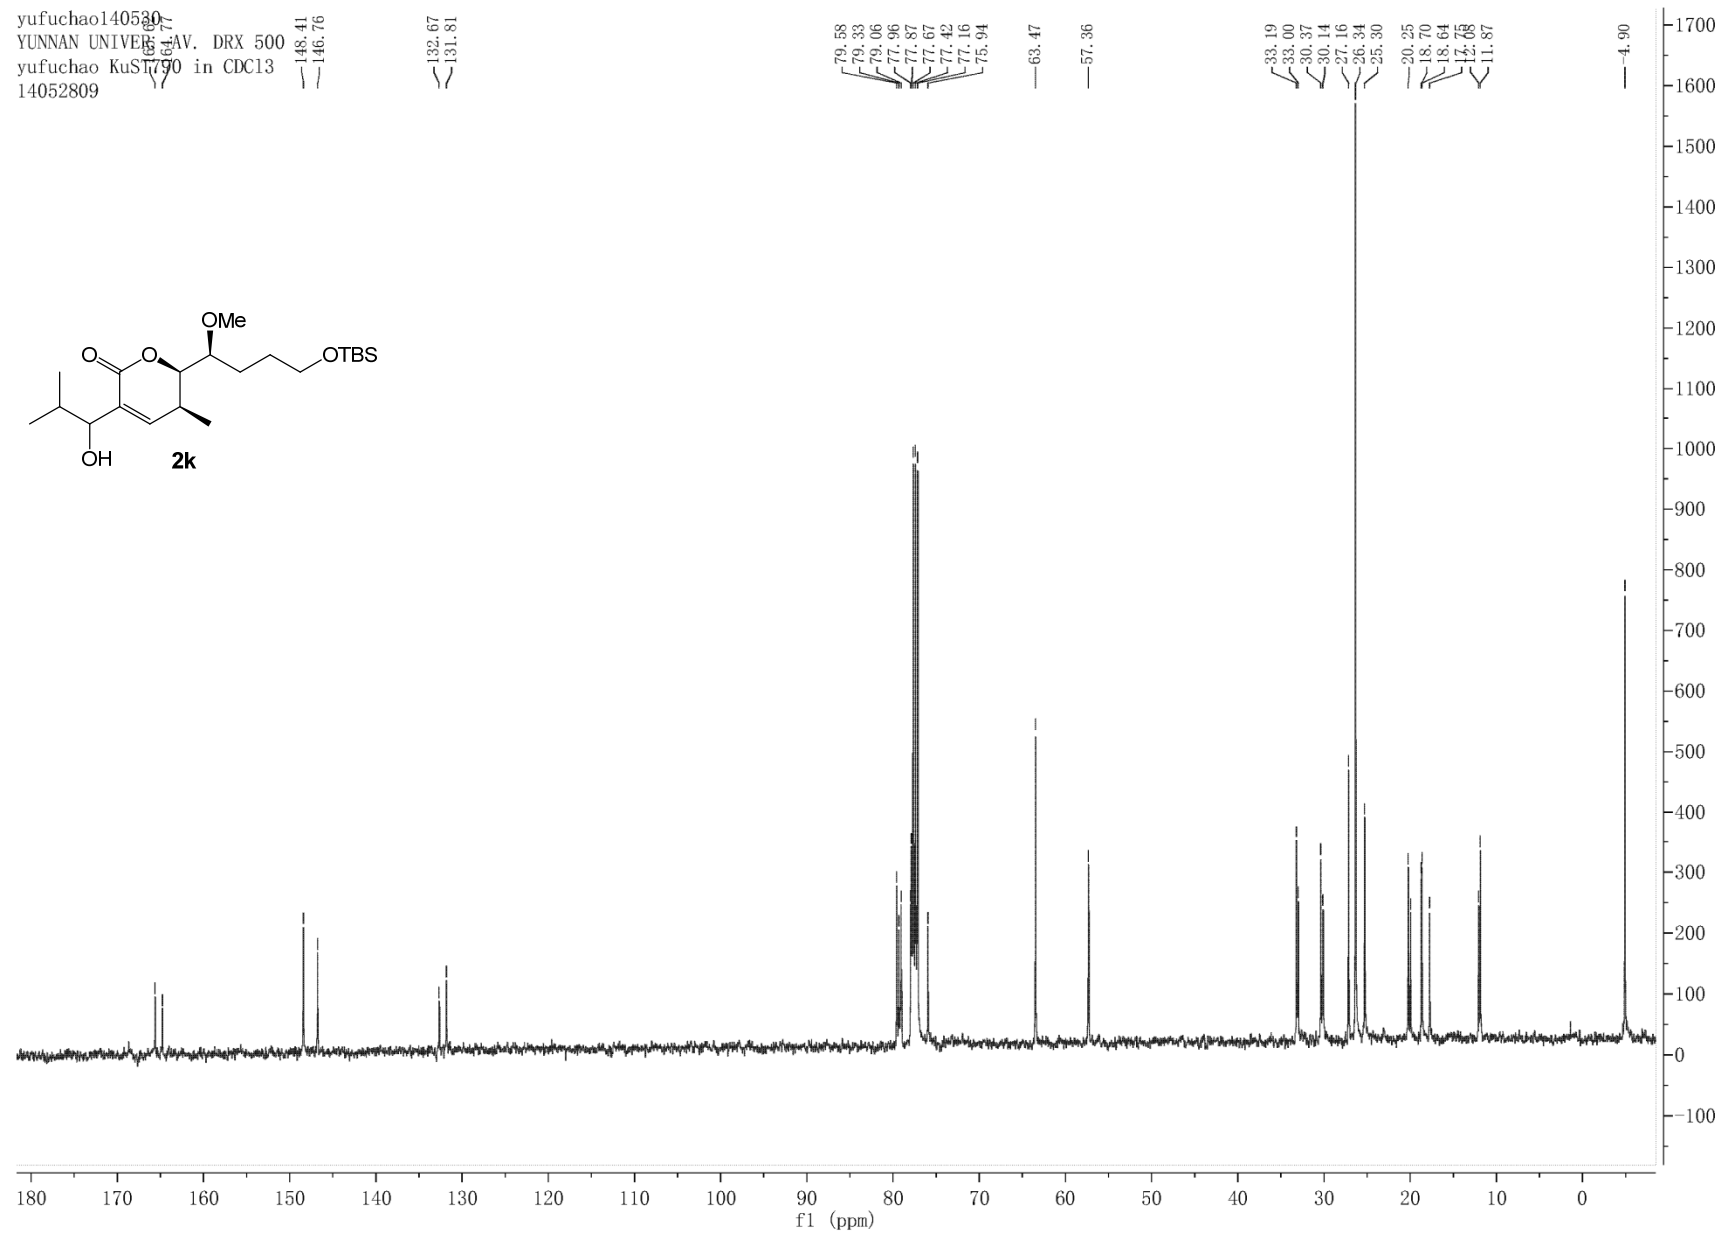

2014753-FL-022h\_pslabel\_01  
Gradient Shimming

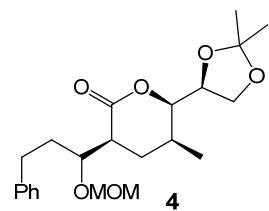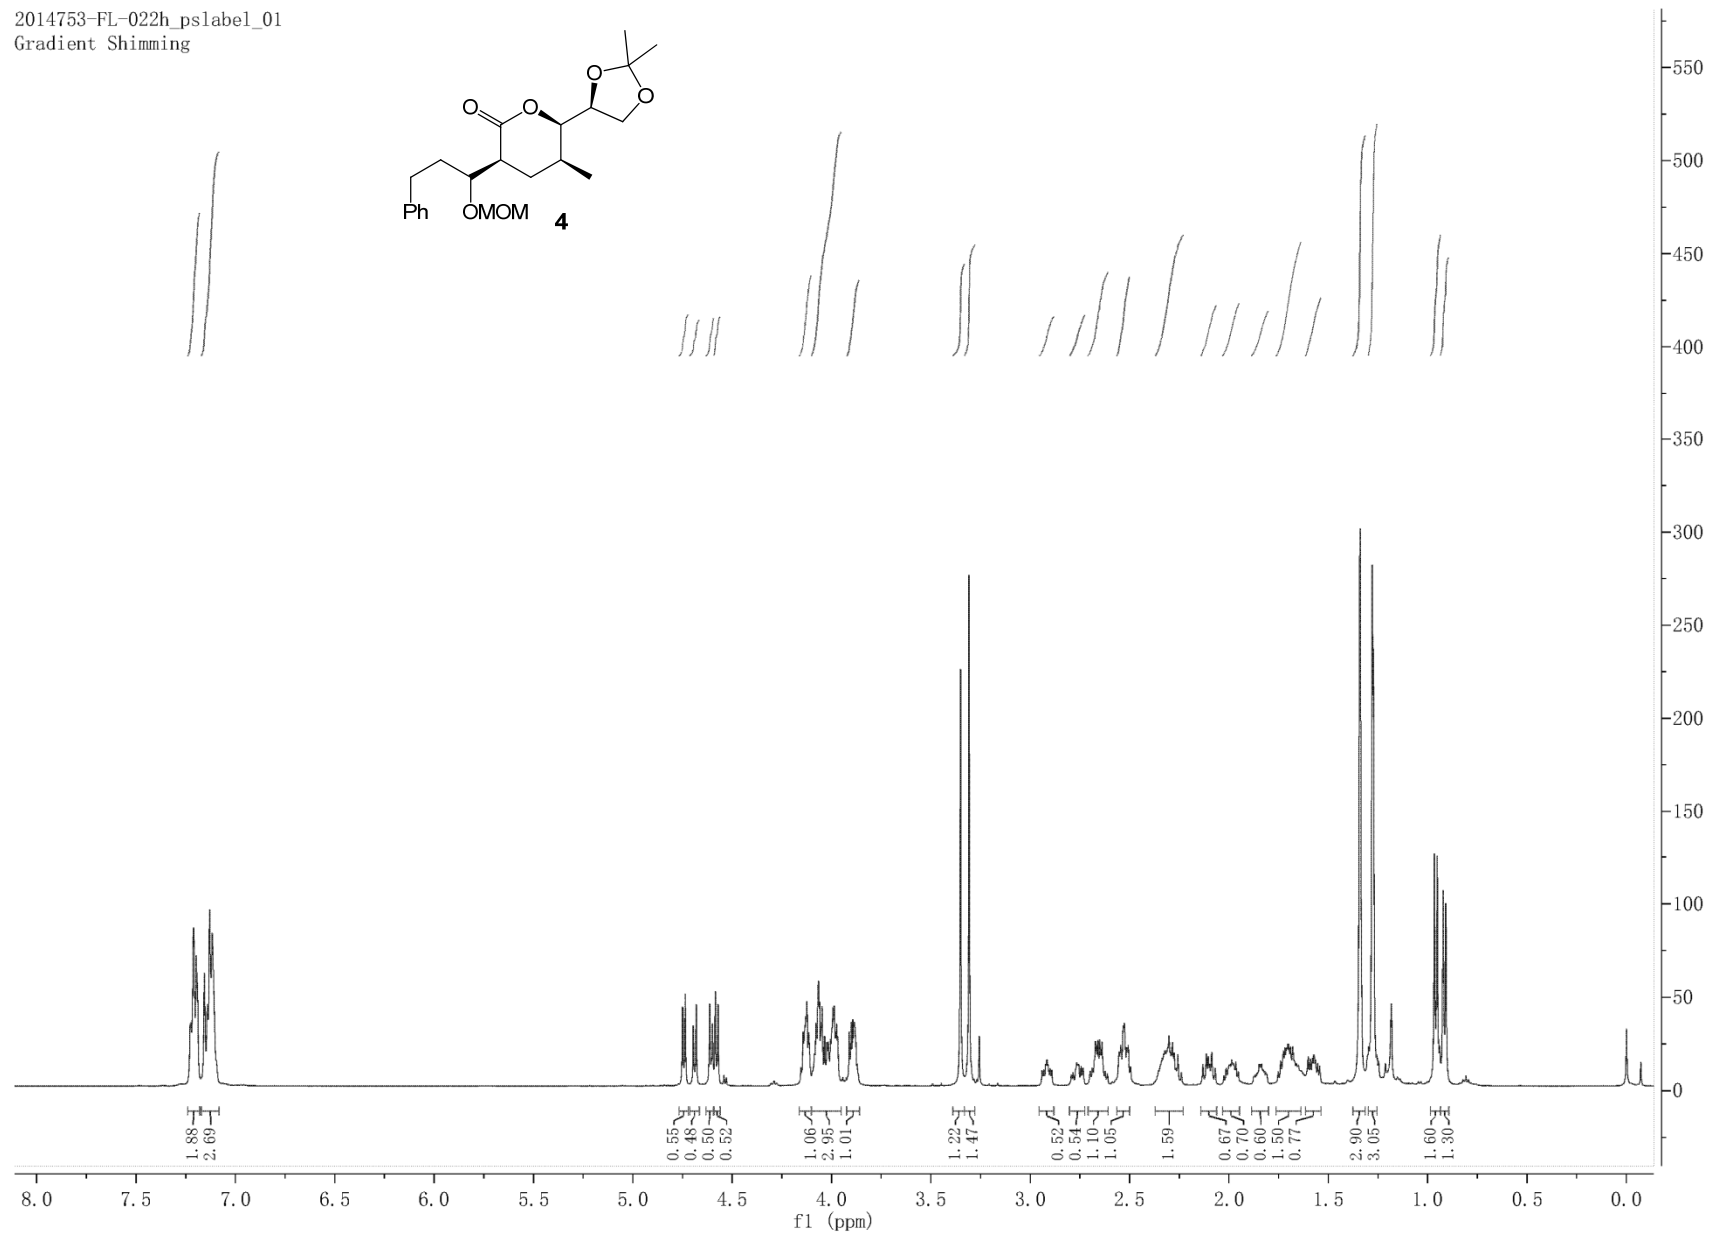

2014753661-022C\_pslabel\_01  
Gradient Shimming

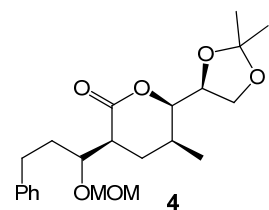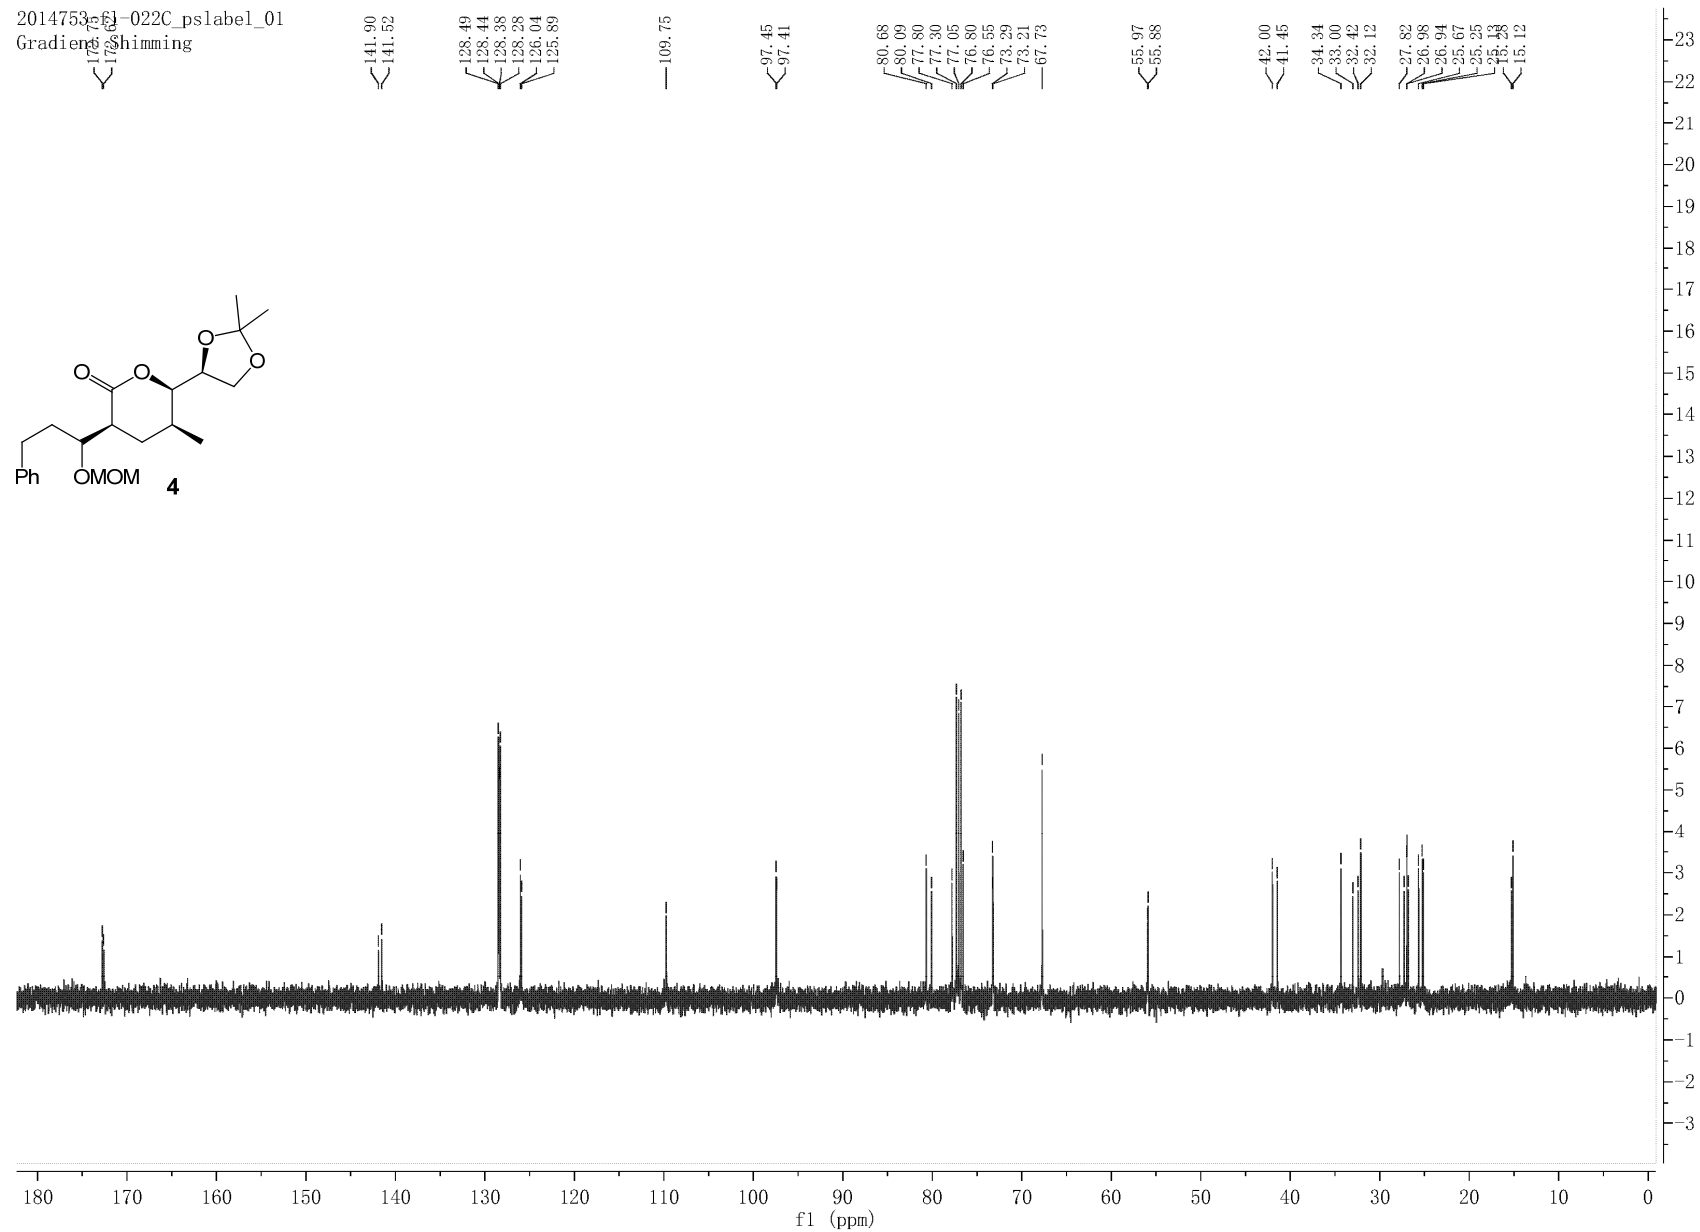

Supplement: c6ob02129h1.pdf [file c6ob02129h1.pdf]
